# Supplementary material for: Regioselective one-pot synthesis of 1,4-disubstituted 1,2,3-triazoles over Ag–Zn-based nanoheterostructured catalysts
Source: Royal Society of Chemistry journal article supplement (doi:10.1039/d4nj03273j), 2024-01-01

## **Supporting Information**

### **Regioselective One-pot Synthesis of 1,4-Disubstituted 1,2,3-Triazoles Over Ag-Zn-based Nanoheterostructured Catalysts**

Priyanka Gogoi,<sup>a</sup> Monisur Rahman,<sup>a</sup> Roktopol Hazarika,<sup>a</sup> Babulal Das,<sup>b</sup> Kalyanjyoti Deori<sup>a\*</sup>  
and Diganta Sarma<sup>a\*</sup>

<sup>a</sup>Department of Chemistry, Dibrugarh University, Dibrugarh-786004, Assam, India

<sup>b</sup>Central Instruments Facility, Indian Institute of Technology Guwahati, Guwahati, 781039  
Assam, India

Email: [kalchemdu@dibru.ac.in](mailto:kalchemdu@dibru.ac.in), [dsarma22@dibru.ac.in](mailto:dsarma22@dibru.ac.in)

## **Contents**

|    |                                                                                         |       |
|----|-----------------------------------------------------------------------------------------|-------|
| 1. | Single crystal XRD data                                                                 | 3-4   |
| 2. | ICP data for fresh and recovered catalyst                                               | 4     |
| 3. | Comparison of the current work with some earlier nanomaterials catalysed AAC reactions. | 5     |
| 3. | HRTEM image of Ag <sub>2</sub> O-ZnO                                                    | 6     |
| 4. | Analytical data of 1,2,3-triazole derivatives                                           | 7-12  |
| 5. | NMR spectra                                                                             | 13-82 |
| 6. | Check CIF file for the single crystal XRD data                                          | 83-84 |

## 1. Single Crystal XRD Studies:

We have developed single crystals for **4af** (Table 3, main manuscript) and analyses clearly suggests discrete formation of the molecules.

The single crystal data collections were carried out using a Bruker D-8 Quest diffractometer with a photon detector (Mo K $\alpha$ : 0.71073 Å, monochromator: graphite). Frames were collected at room temperature by  $\omega$ ,  $\phi$ , and  $2\theta$  rotation at 3 s per frame. The SAINT software was used to integrate the measured intensities. Structure solution, refinement, and data output were carried out using the inbuilt SHELXTL-2018 program. Non-hydrogen atoms were refined anisotropically. C–H hydrogen atoms were placed in geometrically calculated positions by using a riding model. Images were created by using the ORTEP program.

The thin needle like crystals of **4af** crystallized in the monoclinic system with the space group  $P2_1$ . The crystals contain one molecule in each of its asymmetric unit (Figure S1). All crystallographic details are listed in Table S1.

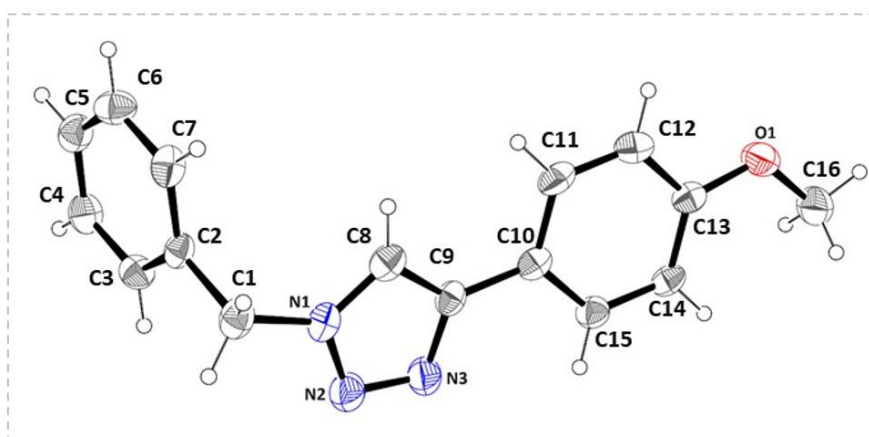

**Fig. S1:** X-ray structure (ORTEP view) of 1,2,3-triazole compound **4af** (Table 3, main manuscript).

**Table S1:** Crystallographic parameters

|                   |                                                  |
|-------------------|--------------------------------------------------|
| CCDC              | 2308691                                          |
| Molecular formula | C <sub>16</sub> H <sub>15</sub> N <sub>3</sub> O |
| Molecular weight  | 265.32                                           |
| Crystal system    | Monoclinic                                       |
| Space group       | P2 <sub>1</sub>                                  |
| Temperature (K)   | 296 (2)                                          |

|                                         |             |
|-----------------------------------------|-------------|
| a (Å)                                   | 8.1513(8)   |
| b (Å)                                   | 5.6813(6)   |
| c (Å)                                   | 14.7970(15) |
| $\alpha$ (°)                            | 90          |
| $\beta$ (°)                             | 93.787(3)   |
| $\gamma$ (°)                            | 90          |
| V (Å <sup>3</sup> )                     | 683.75(12)  |
| Z                                       | 2           |
| D <sub>calc</sub> (g cm <sup>-3</sup> ) | 1.289       |
| $\mu$ (mm <sup>-1</sup> )               | 0.083       |
| Total collected reflections             | 11528       |
| Unique reflections                      | 1275        |
| Observed reflections                    | 1539        |
| R <sub>int</sub>                        | 0.0435      |
| R <sub>1</sub> (obs)                    | 0.0492      |
| wR <sub>1</sub> (obs)                   | 0.1057      |
| R <sub>2</sub> (all)                    | 0.0666      |
| wR <sub>2</sub> (all)                   | 0.1202      |

**Table S2:** Ag and Zn content of Ag<sub>2</sub>O-ZnO before and after reaction

| <b>Metal</b> | <b>Measured loading<br/>before reaction<br/>(mol%)<sup>a</sup></b> | <b>Measured loading<br/>after 8<sup>th</sup> cycle of<br/>reaction (mol%)<sup>a</sup></b> |
|--------------|--------------------------------------------------------------------|-------------------------------------------------------------------------------------------|
| <b>Ag</b>    | 2.162                                                              | 2.154                                                                                     |
| <b>Zn</b>    | 12.88                                                              | 12.82                                                                                     |

<sup>a</sup>mol% of metal present in 20 mg of the catalyst

**Table S3:** Comparison of the current work with some earlier nanomaterials catalysed AAC reactions.

| Catalyst                                                              | Solvent                        | Temperature      | Yield (%) | No. of substrates | Ref.             |
|-----------------------------------------------------------------------|--------------------------------|------------------|-----------|-------------------|------------------|
| Cu NPs/C                                                              | H <sub>2</sub> O               | 100 °C           | 89        | 20                | <b>A</b>         |
| Cu NPs/C                                                              | H <sub>2</sub> O               | 70 °C            | 99        | 13                | <b>B</b>         |
| Cu <sub>2</sub> O/CPG                                                 | H <sub>2</sub> O               | 100 °C           | 98        | 17                | <b>C</b>         |
| Ag <sub>2</sub> O NPs                                                 | Toluene                        | 20 °C            | 90        | 8                 | <b>D</b>         |
| Ag NPs-Al <sub>2</sub> O <sub>3</sub> @Fe <sub>2</sub> O <sub>3</sub> | H <sub>2</sub> O               | RT               | 96        | 6                 | <b>E</b>         |
| Ag NPs-graphene                                                       | H <sub>2</sub> O               | RT               | 96        | 13                | <b>F</b>         |
| Au NPs/TiO <sub>2</sub>                                               | MeCN:H <sub>2</sub> O<br>(1:1) | 150 °C<br>MW 30W | 79        | 10                | <b>G</b>         |
| Ni-rGO-zeolite NCs                                                    | H <sub>2</sub> O               | 90 °C            | 94        | 17                | <b>H</b>         |
| ZnC <sub>2</sub> O <sub>4</sub> .2H <sub>2</sub> O NCs                | H <sub>2</sub> O:EG<br>(10:1)  | 60 °C            | 99        | 25                | <b>I</b>         |
| <b>Ag<sub>2</sub>O-ZnO</b>                                            | <b>H<sub>2</sub>O:EG (1:1)</b> | <b>RT</b>        | <b>98</b> | <b>48</b>         | <b>This work</b> |

CPG; Controlled Pore Glass, rGO; reduced graphene oxide, NCs; Nanocrystals, NPs; nanoparticles.

## References

- A) H. Sharghi, R. Khalifeh and M. M. Doroodmand, *Adv. Synth. Catal.*, 2009, **351**, 207–218.
- B) F. Alonso, Y. Moglie, G. Radivoy and M. Yus, *Adv. Synth. Catal.*, 2010, **352**, 3208–3214.
- C) A. A. Rafi, I. Ibrahim and A. Cordova, *Sci. Rep.*, 2020, **10**, 20547
- D) A. M. Ferretti, A. Ponti and G. Molteni, *Tetrahedron Lett.*, 2015, **56**, 5727–5730.
- E) P. Basu, P. Bhanja, N. Salam, T. K. Dey, A. Bhaumik, D. Das and S. M. Islam, *Mol. Catal.*, 2017, **439**, 31–40.
- F) N. Salam, A. Sinha, A. S. Roy, P. Mondal, N. R. Jana and S. K. Manirul Islam, *RSC Adv.*, 2014, **4**, 10001–10012.
- G) I. L. Librando, A. G. Mahmoud, S. A. C. Carabineiro, M. F. C. Guedes da Silva, F. J. Maldonado-Hodar, C. F. G. C. Geraldes and A. J. L. Pombeiro, *Catalysts*, 2021, **12**, 45.
- H) P. Choudhury, S. Chattopadhyay, G. De and B. Basu, *Mater. Adv.* 2021, **2**, 3042–3050.
- I) P. Gogoi, B. Bhattacharyya, B. Chakravorty, A. Garg, P. K. Hazarika, K. Deori and D. Sarma, *ChemNanoMat*, 2023, **9**, e202200407.

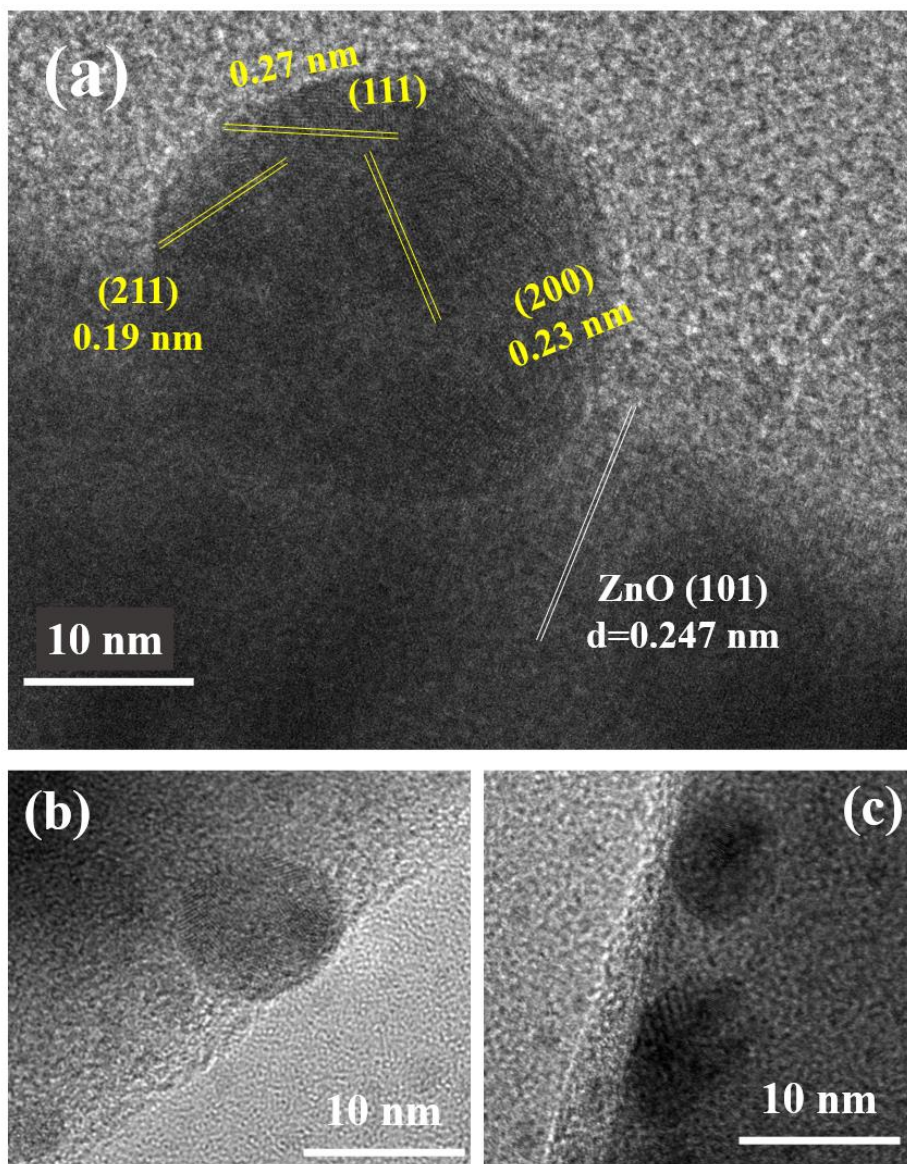

**Fig. S2:** (a-c) High resolution transmission electron microscope (HRTEM) image of as-synthesized Ag<sub>2</sub>O-ZnO nanocomposites.

## Analytical data of 1,2,3-triazole derivatives:

### 1-Benzyl-4-phenyl-1H-1,2,3-triazole (4aa)

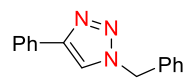 95% yield; white solid; mp 129-130 °C; <sup>1</sup>H NMR (500 MHz, CDCl<sub>3</sub>) δ 7.83 (d, *J* = 8.1 Hz, 2H), 7.69 (s, 1H), 7.42 (dt, *J* = 11.2, 8.1 Hz, 5H), 7.35 (t, *J* = 6.5 Hz, 3H), 5.61 (s, 2H); <sup>13</sup>C NMR (125 MHz, CDCl<sub>3</sub>) δ 148.9, 135.3, 131.2, 129.8, 129.4, 128.81, 128.7, 126.3, 120.1, 54.9; LCMS (ESI) *m/z* calcd for C<sub>15</sub>H<sub>14</sub>N<sub>3</sub> ([M+H]<sup>+</sup>) 236.11, found 236.11.

### 4-((4-phenyl-1H-1,2,3-triazol-1-yl)methyl)benzonitrile (4ba)

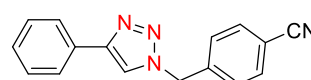 94% yield; colorless solid; <sup>1</sup>H NMR (500 MHz, CDCl<sub>3</sub>) δ 7.73 (d, *J* = 7.7 Hz, 2H), 7.66 (s, 1H), 7.60 (d, *J* = 8.1 Hz, 2H), 7.30 (ddt, *J* = 23.0, 14.8, 7.4 Hz, 5H), 5.57 (s, 2H). <sup>13</sup>C NMR (125 MHz, CDCl<sub>3</sub>) δ 151.6, 142.9, 135.9, 133.1, 131.9, 131.5, 131.4, 128.8, 122.7, 121.1, 115.8, 56.5; LCMS (ESI) *m/z* calcd for C<sub>16</sub>H<sub>13</sub>N<sub>4</sub> ([M+H]<sup>+</sup>) 261.11, found 261.14.

### 4-phenyl-1-(4-(trifluoromethyl)benzyl)-1H-1,2,3-triazole (4ca)

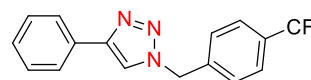 93% yield; white solid; mp 118-120 °C; <sup>1</sup>H NMR (500 MHz, CDCl<sub>3</sub>) δ 7.74 (d, *J* = 7.7 Hz, 2H), 7.63 (s, 1H), 7.58 (d, *J* = 7.9 Hz, 2H), 7.39 – 7.30 (m, 4H), 7.26 (t, *J* = 7.3 Hz, 1H), 5.58 (s, 2H); <sup>13</sup>C NMR (125 MHz, CDCl<sub>3</sub>) δ 148.6, 138.7, 131.5-130.7 (q, *J* = 32.5 Hz), 130.3, 128.9, 128.4, 128.2, 126.1 (q, *J* = 3.75 Hz), 125.8, 124.8, 122.7, 119.5, 53.6; <sup>19</sup>F NMR (470 MHz, CDCl<sub>3</sub>) δ -62.91; LCMS (ESI) *m/z* calcd for C<sub>16</sub>H<sub>13</sub>F<sub>3</sub>N<sub>3</sub> ([M+H]<sup>+</sup>) 304.10, found 304.12.

### 1-(4-chlorobenzyl)-4-phenyl-1H-1,2,3-triazole (4da)

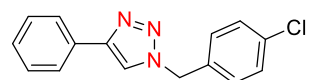 87% yield; white solid; mp 150-152 °C; <sup>1</sup>H NMR (500 MHz, CDCl<sub>3</sub>) δ 7.80 (d, *J* = 7.8 Hz, 2H), 7.74 (s, 1H), 7.47 – 7.37 (m, 5H), 7.01 (d, *J* = 8.3 Hz, 2H), 5.51 (s, 2H); LCMS (ESI) *m/z* calcd for C<sub>15</sub>H<sub>12</sub>ClN<sub>3</sub>Na ([M+Na]<sup>+</sup>) 292.07, found 292.10.

### 1-(4-bromobenzyl)-4-phenyl-1H-1,2,3-triazole (4ea)

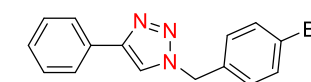 88% yield; pale yellow solid; mp 149-151 °C; <sup>1</sup>H NMR (500 MHz, CDCl<sub>3</sub>) δ 7.81 (d, *J* = 9.4 Hz, 2H), 7.75 (s, 1H), 7.52 (d, *J* = 8.4 Hz, 2H), 7.43 (dd, *J* = 14.2, 7.9 Hz, 5H), 5.54 (s, 2H); <sup>13</sup>C NMR (125 MHz, CDCl<sub>3</sub>) δ 132.2, 131.9, 130.2, 129.5, 128.9, 128.7, 128.2, 126.6, 125.6, 122.8, 122.2, 119.3, 66.5; LCMS (ESI) *m/z* calcd for C<sub>15</sub>H<sub>12</sub>BrN<sub>3</sub>Na ([M+Na]<sup>+</sup>) 336.02, found 336.02.

### 1-(4-fluorobenzyl)-4-phenyl-1H-1,2,3-triazole (4fa)

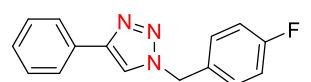 86% yield; yellow solid; <sup>1</sup>H NMR (500 MHz, CDCl<sub>3</sub>) δ 7.82 (d, 2H), 7.73 (s, 1H), 7.30 – 7.44 (m, 5H), 7.10 (t, 2H), 5.55 (s, 2H); <sup>13</sup>C NMR (125 MHz, CDCl<sub>3</sub>) δ 162.9 (d, *J* = 248.3 Hz), 130.5 (d, *J* = 3.1 Hz), 130.4, 130.0 (d, *J* = 8.3 Hz), 128.9, 128.3, 125.7, 116.3, 116.1, 53.5; <sup>19</sup>F NMR (471 MHz, CDCl<sub>3</sub>) δ -112.57; LCMS (ESI) *m/z* calcd for C<sub>15</sub>H<sub>12</sub>FN<sub>3</sub>Na ([M+Na]<sup>+</sup>) 276.01, found 276.03.

### 1-(3-bromobenzyl)-4-phenyl-1H-1,2,3-triazole (4ha)

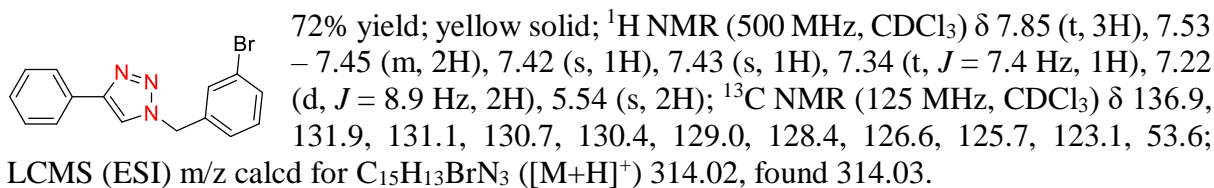

### 1-(4-(tert-butyl)benzyl)-4-phenyl-1H-1,2,3-triazole (4ia)

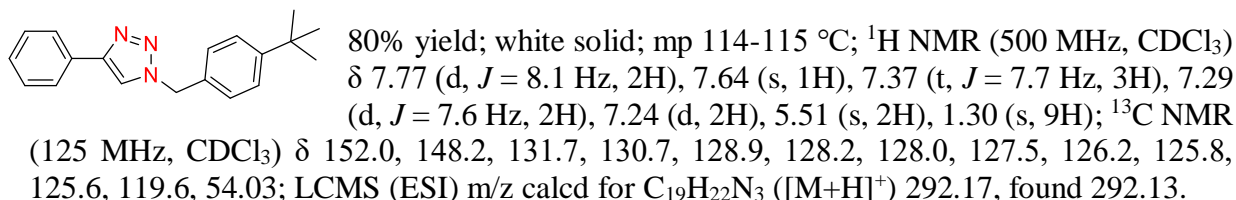

### 1-(3,5-di-tert-butylbenzyl)-4-phenyl-1H-1,2,3-triazole (4ja)

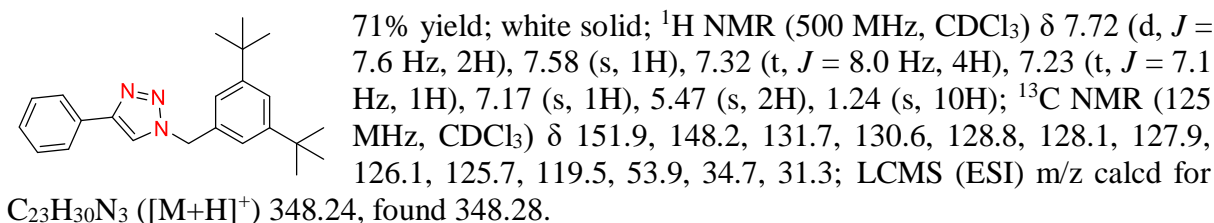

### 1-(3-chloro-5-fluorobenzyl)-4-phenyl-1H-1,2,3-triazole (4ka)

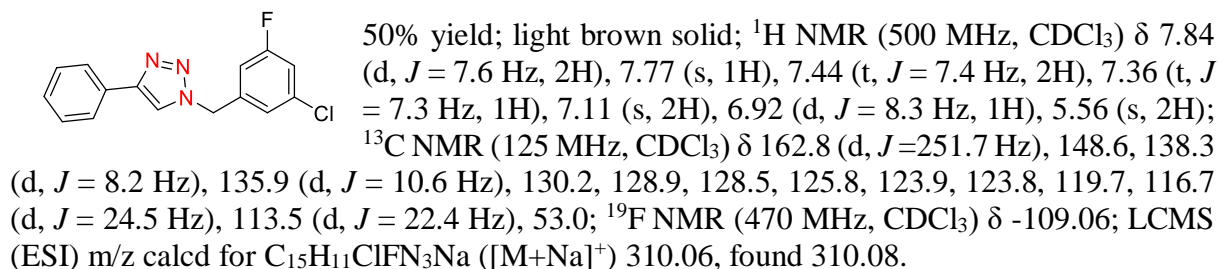

### 1-benzyl-4-(4-fluorophenyl)-1H-1,2,3-triazole (4ab)

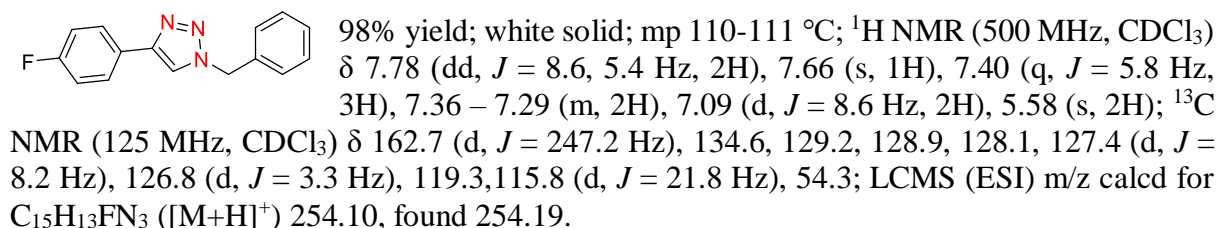

### Ethyl 1-benzyl-1H-1,2,3-triazole-4-carboxylate (4ac)

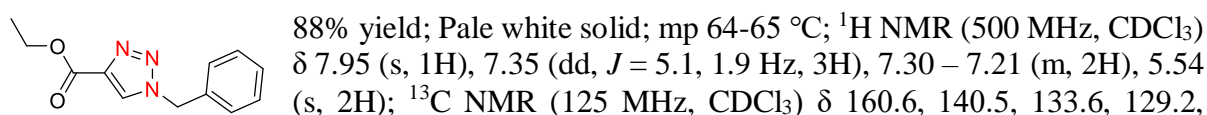



129.1, 128.2, 127.2, 61.2, 54.4, 14.2; LCMS (ESI) m/z calcd for C<sub>12</sub>H<sub>13</sub>N<sub>3</sub>O<sub>2</sub>Na ([M+Na]<sup>+</sup>) 254.10, found 254.10.

### 1-benzyl-4-(3,5-bis(trifluoromethyl)phenyl)-1H-1,2,3-triazole (4ad)

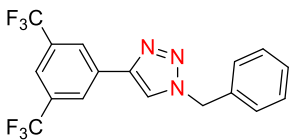 86% yield; White solid; <sup>1</sup>H NMR (500 MHz, CDCl<sub>3</sub>) δ 8.17 (s, 2H), 7.73 (d, *J* = 11.1 Hz, 2H), 7.36 – 7.29 (m, 3H), 7.25 (dd, *J* = 7.4, 1.9 Hz, 2H), 5.53 (s, 2H); <sup>13</sup>C NMR (125 MHz, CDCl<sub>3</sub>) δ 145.5, 134.1, 132.7, 132.6-132.8 (q, *J* = 33.5 Hz), 131.8, 129.3 (q, *J* = 270 Hz), 129.1, 128.2, 125.6, 125.6, 124.3, 122.1, 121.6-121.5 (dt, *J* = 7.4, 3.7 Hz), 120.5, 54.5; <sup>19</sup>F NMR (470 MHz, CDCl<sub>3</sub>) δ -62.80; LCMS (ESI) m/z calcd for C<sub>17</sub>H<sub>12</sub>F<sub>6</sub>N<sub>3</sub> ([M+H]<sup>+</sup>) 372.09, found 372.11.

### 3-(1-benzyl-1H-1,2,3-triazol-4-yl)aniline (4ae)

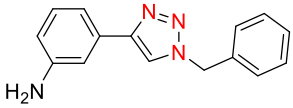 92% yield; Pale brown solid; mp 146-148 °C; <sup>1</sup>H NMR (500 MHz, CDCl<sub>3</sub>) δ 7.69 (s, 1H), 7.40 (d, *J* = 6.8 Hz, 3H), 7.35 – 7.29 (m, 4H), 7.24 (d, *J* = 7.2 Hz, 1H), 7.19 (t, *J* = 7.7 Hz, 1H), 7.15 (d, *J* = 7.6 Hz, 1H), 5.57 (s, 2H), 4.55 (s, 2H); <sup>13</sup>C NMR (125 MHz, CDCl<sub>3</sub>) δ 135.5, 132.2, 132.1, 132.0, 130.5, 129.8, 129.4, 128.7, 120.6, 116.5, 115.7, 115.3, 112.9, 112.2, 54.8; LCMS (ESI) m/z calcd for C<sub>15</sub>H<sub>14</sub>N<sub>4</sub>Na ([M+Na]<sup>+</sup>) 273.12, found 273.11.

### 1-benzyl-4-(4-methoxyphenyl)-1H-1,2,3-triazole (4af)

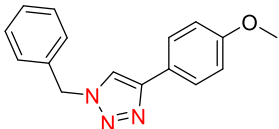 95% yield; White solid; mp 141-143 °C; <sup>1</sup>H NMR (500 MHz, CDCl<sub>3</sub>) δ 7.80 – 7.75 (m, 2H), 7.64 (s, 1H), 7.46 – 7.38 (m, 3H), 7.35 (dd, *J* = 7.6, 1.7 Hz, 2H), 7.01 – 6.94 (m, 2H), 5.60 (s, 2H), 3.87 (s, 3H); <sup>13</sup>C NMR (125 MHz, CDCl<sub>3</sub>) δ 159.7, 148.2, 134.9, 129.3, 128.9, 128.2, 127.1, 123.4, 118.9, 114.3, 55.4, 54.3; LCMS (ESI) m/z calcd for C<sub>16</sub>H<sub>16</sub>N<sub>3</sub>O ([M+H]<sup>+</sup>) 265.12, found 265.14.

### 1-benzyl-4-(p-tolyl)-1H-1,2,3-triazole (4ag)

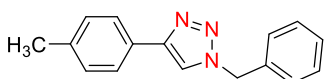 95% yield; Pale yellow solid; mp 151-153 °C; <sup>1</sup>H NMR (500 MHz, CDCl<sub>3</sub>) δ 7.72 (d, *J* = 8.1 Hz, 2H), 7.66 (s, 1H), 7.45 – 7.29 (m, 5H), 7.23 (d, *J* = 8.1 Hz, 2H), 5.59 (s, 2H), 2.39 (s, 3H); <sup>13</sup>C NMR (125 MHz, CDCl<sub>3</sub>) δ 148.3, 139.3, 138.1, 134.7, 129.5, 129.2, 128.9, 128.8, 128.1, 127.6, 127.2, 125.6, 119.2, 54.2, 21.3; LCMS (ESI) m/z calcd for C<sub>16</sub>H<sub>16</sub>N<sub>3</sub> ([M+H]<sup>+</sup>) 250.13, found 250.11.

### 9-(1-benzyl-1H-1,2,3-triazol-4-yl)-9H-fluoren-9-ol (4ak)

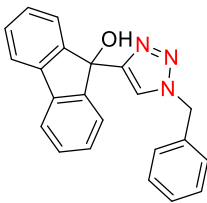 76% yield; Light orange solid; <sup>1</sup>H NMR (500 MHz, DMSO-*d*<sub>6</sub>) δ 10.56 (s, 1H), 8.36 (s, 1H), 7.82 (d, *J* = 7.1 Hz, 2H), 7.59 (d, *J* = 6.9 Hz, 3H), 7.37 (dt, *J* = 43.4, 6.7 Hz, 5H), 7.10 (d, *J* = 7.8 Hz, 1H), 6.97 (t, *J* = 7.0 Hz, 1H), 6.47 (s, 1H), 3.37 (s, 2H); <sup>13</sup>C NMR (126 MHz, DMSO-*d*<sub>6</sub>) δ 149.8, 149.6, 149.5, 139.6, 130.4, 129.3, 128.4, 125.6, 125.4, 120.6, 120.0, 117.5, 115.1, 78.6; LCMS (ESI) m/z calcd for C<sub>22</sub>H<sub>17</sub>N<sub>3</sub>ONa ([M+Na]<sup>+</sup>) 362.14, found 362.13.

### 1-benzyl-4,5-diphenyl-1H-1,2,3-triazole (4al)

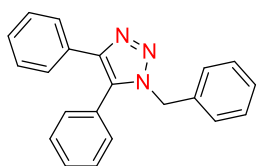

45% yield; Dark brown solid;  $^1\text{H}$  NMR (500 MHz,  $\text{CDCl}_3$ )  $\delta$  7.57 (d,  $J = 7.3$  Hz, 2H), 7.49 (t,  $J = 7.4$  Hz, 1H), 7.43 (t,  $J = 7.5$  Hz, 2H), 7.27 (dd,  $J = 8.7, 4.5$  Hz, 6H), 7.16 (d,  $J = 7.4$  Hz, 2H), 7.08 – 7.00 (m, 2H), 5.42 (s, 2H);  $^{13}\text{C}$  NMR (125 MHz,  $\text{CDCl}_3$ )  $\delta$  143.5, 134.4, 134.2, 132.9, 130.6, 129.9, 129.1, 128.7, 128.2, 127.7, 127.6, 127.5, 127.4, 127.2, 126.8, 126.7, 126.7, 126.5, 126.2, 125.7, 51.0; LCMS (ESI)  $m/z$  calcd for  $\text{C}_{21}\text{H}_{18}\text{N}_3$  ( $[\text{M}+\text{Na}]^+$ ) 312.14, found 312.19.

### 4-(thiophen-3-yl)-1-(4-(trifluoromethyl)benzyl)-1H-1,2,3-triazole (4ci)

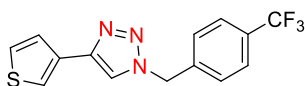

98% yield;  $^1\text{H}$  NMR (500 MHz,  $\text{CDCl}_3$ )  $\delta$  7.63 – 7.55 (m, 3H), 7.53 (s, 1H), 7.39 – 7.27 (m, 4H), 5.57 (s, 2H);  $^{13}\text{C}$  NMR (125 MHz,  $\text{CDCl}_3$ )  $\delta$  144.7, 138.6, 131.5–131.2 (q,  $J = 32.8$  Hz), 131.0, 128.2, 126.5, 126.2–126.1 (q,  $J = 3.8$  Hz), 125.7, 121.4, 119.3, 53.5; LCMS (ESI)  $m/z$  calcd for  $\text{C}_{14}\text{H}_{11}\text{F}_3\text{N}_3\text{S}$  ( $[\text{M}+\text{H}]^+$ ) 310.05, found 310.05.

### 1-(4-chlorobenzyl)-4-(thiophen-3-yl)-1H-1,2,3-triazole (4di)

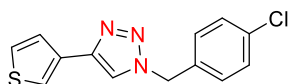

83% yield; Brown solid; mp 179–181 °C;  $^1\text{H}$  NMR (500 MHz,  $\text{CDCl}_3$ )  $\delta$  7.68 (dd,  $J = 2.9, 1.1$  Hz, 1H), 7.62 (s, 1H), 7.44 (dd,  $J = 5.0, 1.1$  Hz, 1H), 7.40 – 7.35 (m, 3H), 7.25 (d,  $J = 8.4$  Hz, 2H), 5.54 (s, 2H);  $^{13}\text{C}$  NMR (125 MHz,  $\text{CDCl}_3$ )  $\delta$  144.8, 135.0, 133.4, 131.9, 129.6, 126.7, 126.0, 121.5, 119.6, 53.7; LCMS (ESI)  $m/z$  calcd for  $\text{C}_{13}\text{H}_{11}\text{ClN}_3\text{S}$  ( $[\text{M}+\text{H}]^+$ ) 276.03, found 276.04.

### 4-(4-fluorophenyl)-1-(4-(trifluoromethyl)benzyl)-1H-1,2,3-triazole (4cb)

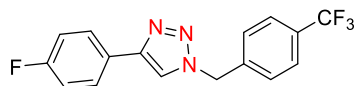

90% yield;  $^1\text{H}$  NMR (500 MHz,  $\text{CDCl}_3$ )  $\delta$  7.81 (dd,  $J = 8.3, 5.5$  Hz, 2H), 7.68 (d,  $J = 8.1$  Hz, 3H), 7.44 (d,  $J = 8.0$  Hz, 2H), 7.13 (t,  $J = 8.6$  Hz, 2H), 5.67 (s, 2H);  $^{13}\text{C}$  NMR (125 MHz,  $\text{CDCl}_3$ )  $\delta$  163.6 – 162.0 (d,  $J = 247.7$  Hz), 147.7, 138.5, 131.3–131.0 (d,  $J = 32.7$  Hz), 128.2, 127.5 – 127.5 (d,  $J = 8.1$  Hz), 126.5, 126.5, 126.2 – 126.1 (q,  $J = 3.6$  Hz), 124.6 – 122.9 (q,  $J = 272.1$  Hz), 119.3, 115.9 – 115.8 (d,  $J = 21.8$  Hz), 53.6; LCMS (ESI)  $m/z$  calcd for  $\text{C}_{16}\text{H}_{12}\text{F}_4\text{N}_3$  ( $[\text{M}+\text{H}]^+$ ) 322.09, found 322.10.

### 1-(4-chlorobenzyl)-4-(4-fluorophenyl)-1H-1,2,3-triazole (4db)

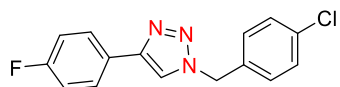

81% yield; White solid; mp 106–108 °C;  $^1\text{H}$  NMR (500 MHz,  $\text{CDCl}_3$ )  $\delta$  7.79 (dd,  $J = 8.6, 5.3$  Hz, 2H), 7.66 (s, 1H), 7.38 (d,  $J = 8.4$  Hz, 2H), 7.28 (t,  $J = 8.3$  Hz, 2H), 7.11 (t,  $J = 8.6$  Hz, 2H), 5.56 (s, 2H);  $^{13}\text{C}$  NMR (125 MHz,  $\text{CDCl}_3$ )  $\delta$  163.6 (d,  $J = 247.8$  Hz), 147.6, 135.0, 133.2, 129.5, 127.6 (d,  $J = 7.9$  Hz), 126.7 (d,  $J = 2.7$  Hz), 119.3, 116.0 (d,  $J = 21.7$  Hz), 53.6; LCMS (ESI)  $m/z$  calcd for  $\text{C}_{15}\text{H}_{12}\text{ClFN}_3$  ( $[\text{M}+\text{H}]^+$ ) 288.06, found 288.07.

### 1-(4-bromobenzyl)-4-(4-fluorophenyl)-1H-1,2,3-triazole (4eb)

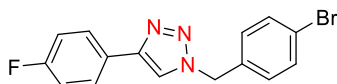

85% yield; Pale yellow solid;  $^1\text{H}$  NMR (500 MHz,  $\text{CDCl}_3$ )  $\delta$  7.74 (dd,  $J = 7.9, 5.6$  Hz, 2H), 7.61 (s, 1H), 7.49 (d,  $J = 8.2$  Hz, 2H),

7.16 (d,  $J = 8.1$  Hz, 2H), 7.07 (t,  $J = 8.3$  Hz, 2H), 5.50 (s, 2H);  $^{13}\text{C}$  NMR (125 MHz,  $\text{CDCl}_3$ )  $\delta$  162.8 (d,  $J = 247.2$  Hz), 147.6, 135.3, 133.7, 132.4, 129.8, 127.6 (d,  $J = 8.4$  Hz), 126.7 (d,  $J = 3.3$  Hz), 125.1, 123.1, 119.3, 115.9 (d,  $J = 21.7$  Hz), 53.6; LCMS (ESI)  $m/z$  calcd for  $\text{C}_{15}\text{H}_{12}\text{BrFN}_3$  ( $[\text{M}+\text{H}]^+$ ) 332.01, found 332.10; ( $[\text{M}+2]$ ) 333.01, found 333.07.

#### 4-(3,5-bis(trifluoromethyl)phenyl)-1-(4-chlorobenzyl)-1H-1,2,3-triazole (4dd)

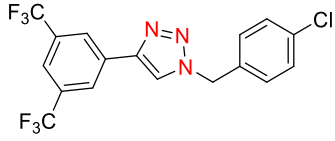 78% yield; colourless liquid;  $^1\text{H}$  NMR (500 MHz,  $\text{CDCl}_3$ )  $\delta$  8.24 (s, 2H), 7.98 (s, 1H), 7.79 (s, 1H), 7.36 – 7.22 (m, 4H), 5.58 (s, 2H);  $^{13}\text{C}$  NMR (125 MHz,  $\text{CDCl}_3$ )  $\delta$  145.9, 135.5, 133.2, 133.0, 132.99–132.2 (q,  $J = 33.5$  Hz), 129.9, 129.8, [(126.86, 124.69, 122.52, 120.35) (q,  $J = 271.25$ )], 126.0, 125.9, 122.0 – 121.9 (dt,  $J = 7.4, 3.7$  Hz), 121.3, 54.1;  $^{19}\text{F}$  NMR (470 MHz,  $\text{CDCl}_3$ )  $\delta$  -63.10; LCMS (ESI)  $m/z$  calcd for  $\text{C}_{17}\text{H}_{11}\text{ClF}_6\text{N}_3$  ( $[\text{M}+\text{H}]^+$ ) 406.05, found 406.05.

#### 4-(p-tolyl)-1-(4-(trifluoromethyl)benzyl)-1H-1,2,3-triazole (4cg)

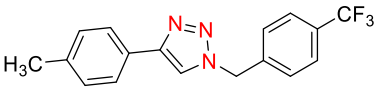 90% yield; Pale yellow solid; mp 151-153 °C;  $^1\text{H}$  NMR (500 MHz,  $\text{CDCl}_3$ )  $\delta$  7.76 – 7.64 (m, 5H), 7.43 (d,  $J = 8.1$  Hz, 2H), 7.25 (d,  $J = 8.0$  Hz, 2H), 5.66 (s, 2H), 2.40 (s, 3H);  $^{13}\text{C}$  NMR (125 MHz,  $\text{CDCl}_3$ )  $\delta$  148.7, 138.8, 138.3, 131.4 – 130.8 (q,  $J = 32.6, 32.1$  Hz), 129.6, 128.3, 127.5, 126.2 – 126.2 (q,  $J = 3.6$  Hz), 125.7, 124.8 – 122.9 (q,  $J = 271.7$  Hz), 119.3, 53.6, 21.4; LCMS (ESI)  $m/z$  calcd for  $\text{C}_{17}\text{H}_{15}\text{F}_3\text{N}_3$  ( $[\text{M}+\text{H}]^+$ ) 318.11, found 318.12.

#### 1-(4-chlorobenzyl)-4-(p-tolyl)-1H-1,2,3-triazole (4dg)

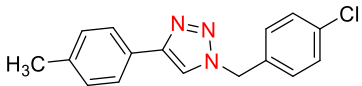 95% yield; Off white solid; mp 140-142 °C;  $^1\text{H}$  NMR (500 MHz,  $\text{CDCl}_3$ )  $\delta$  7.71 (d,  $J = 7.5$  Hz, 2H), 7.65 (s, 1H), 7.39 (d,  $J = 7.6$  Hz, 2H), 7.26 (dd,  $J = 18.1, 7.7$  Hz, 4H), 5.56 (s, 2H), 2.39 (s, 3H);  $^{13}\text{C}$  NMR (125 MHz,  $\text{CDCl}_3$ )  $\delta$  148.5, 138.2, 134.9, 133.2, 129.6, 129.4, 127.5, 125.7, 119.2, 53.5, 21.3; LCMS (ESI)  $m/z$  calcd for  $\text{C}_{16}\text{H}_{15}\text{ClN}_3$  ( $[\text{M}+\text{H}]^+$ ) 284.09, found 284.11.

#### 1-(4-chlorobenzyl)-4-(4-methoxyphenyl)-1H-1,2,3-triazole (4df)

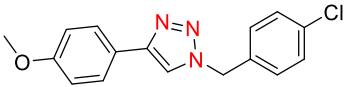 98% yield; White solid;  $^1\text{H}$  NMR (500 MHz,  $\text{CDCl}_3$ )  $\delta$  7.75 (d,  $J = 8.7$  Hz, 2H), 7.61 (s, 1H), 7.39 (d,  $J = 8.4$  Hz, 2H), 7.27 (d,  $J = 8.4$  Hz, 2H), 6.97 (d,  $J = 8.7$  Hz, 2H), 5.56 (s, 2H), 3.86 (s, 3H);  $^{13}\text{C}$  NMR (125 MHz,  $\text{CDCl}_3$ )  $\delta$  159.7, 134.8, 133.3, 129.4, 127.0, 126.9, 123.1, 120.1, 118.6, 114.2, 55.3; LCMS (ESI)  $m/z$  calcd for  $\text{C}_{16}\text{H}_{15}\text{ClN}_3\text{O}$  ( $[\text{M}+\text{H}]^+$ ) 300.08, found 300.07.

#### methyl 1-phenyl-1H-1,2,3-triazole-4-carboxylate (7ac)

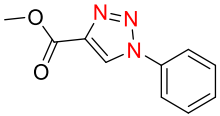 85% yield;  $^1\text{H}$  NMR (500 MHz,  $\text{CDCl}_3$ )  $\delta$  8.57 (s, 1H), 7.76 (d,  $J = 8.0$  Hz, 2H), 7.54 (dt,  $J = 28.6, 7.4$  Hz, 3H), 3.99 (s, 3H);  $^{13}\text{C}$  NMR (125 MHz,  $\text{CDCl}_3$ )  $\delta$  163.0, 140.3, 136.2, 130.0, 129.8, 126.1, 125.7, 120.8, 52.5; LCMS (ESI)  $m/z$  calcd for  $\text{C}_{10}\text{H}_{10}\text{N}_3\text{O}_2$  ( $[\text{M}+\text{H}]^+$ ) 203.07, found 203.08.

### 1-cycloheptyl-4-phenyl-1H-1,2,3-triazole (7ce)

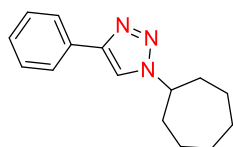

45% yield; Light green liquid;  $^1\text{H}$  NMR (500 MHz,  $\text{CDCl}_3$ )  $\delta$  7.65 (s, 1H), 7.56 (d,  $J = 6.8$  Hz, 2H), 7.43 – 7.33 (m, 3H), 2.64 (s, 1H), 1.28 (s, 10H), 0.94 – 0.87 (m, 2H);  $^{13}\text{C}$  NMR (125 MHz,  $\text{CDCl}_3$ )  $\delta$  132.5, 129.22, 128.5, 121.8, 63.7, 31.9, 29.7, 29.4, 22.7, 14.1; LCMS (ESI)  $m/z$  calcd for  $\text{C}_{15}\text{H}_{20}\text{N}_3$  ( $[\text{M}+\text{H}]^+$ ) 242.16, found 242.16.

### 4-butyl-1-phenyl-1H-1,2,3-triazole (7af)

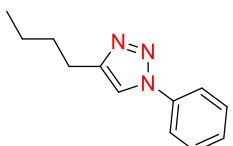

39% yield; Colourless liquid;  $^1\text{H}$  NMR (500 MHz,  $\text{CDCl}_3$ )  $\delta$  7.65 (d,  $J = 5.9$  Hz, 3H), 7.44 (t,  $J = 7.8$  Hz, 2H), 7.35 (t,  $J = 7.9$  Hz, 1H), 2.77 – 2.70 (m, 2H), 1.65 (d,  $J = 7.4$  Hz, 2H), 1.36 (h,  $J = 7.4$  Hz, 2H), 0.89 (t,  $J = 7.4$  Hz, 3H);  $^{13}\text{C}$  NMR (125 MHz,  $\text{CDCl}_3$ )  $\delta$  149.1, 137.2, 129.6, 128.3, 120.3, 118.7, 31.4, 25.2, 22.2, 13.7.

### 2-(4-((1-(3,4-difluorophenyl)-1H-1,2,3-triazol-4-yl)methoxy)phenyl)-2,3-dihydroquinazolin-4(1H)-one (10b)

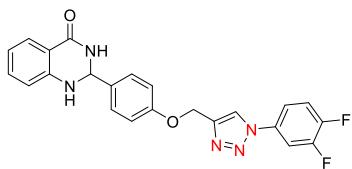

49% yield; Dark brown solid;  $^1\text{H}$  NMR (500 MHz,  $\text{CDCl}_3$ )  $\delta$  8.25 (d,  $J = 36.1$  Hz, 1H), 8.13 (d,  $J = 34.8$  Hz, 1H), 7.76 (d,  $J = 49.7$  Hz, 2H), 7.55 (s, 4H), 7.12 – 6.81 (m, 5H), 6.78 – 6.60 (m, 2H), 5.88 (s, 2H); LCMS (ESI)  $m/z$  calcd for  $\text{C}_{23}\text{H}_{18}\text{F}_2\text{N}_5\text{O}_2$  ( $[\text{M}+\text{H}]^+$ ) 434.14, found 434.33 (Spectra given, **Figure S68**).

### 4-(((1,1'-biphenyl)-4-yloxy)methyl)-1-(2-fluorophenyl)-1H-1,2,3-triazole (10c)

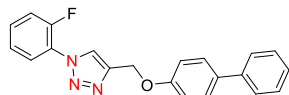

31% yield; Off white solid;  $^1\text{H}$  NMR (500 MHz,  $\text{CDCl}_3$ )  $\delta$  8.21 (d,  $J = 2.2$  Hz, 1H), 8.00 (t,  $J = 7.5$  Hz, 1H), 7.65 – 7.54 (m, 4H), 7.45 (q,  $J = 7.8, 6.9$  Hz, 3H), 7.34 (dq,  $J = 13.9, 8.1$  Hz, 3H), 7.14 (d,  $J = 8.6$  Hz, 2H), 5.38 (s, 2H);  $^{13}\text{C}$  NMR (125 MHz,  $\text{CDCl}_3$ )  $\delta$  157.7, 153.36 (d,  $J = 251.0$  Hz), 144.6, 140.6, 134.4, 130.38 (d,  $J = 7.9$  Hz), 128.8, 128.3, 127.2, 126.8, 126.8, 125.3, 125.3, 125.2, 124.9, 124.16 (d,  $J = 8.3$  Hz), 117.10 (d,  $J = 19.9$  Hz), 115.1, 61.9;  $^{19}\text{F}$  NMR (470 MHz,  $\text{CDCl}_3$ )  $\delta$  -123.55; LCMS (ESI)  $m/z$  calcd for  $\text{C}_{21}\text{H}_{17}\text{FN}_3\text{O}$  ( $[\text{M}+\text{H}]^+$ ) 346.13, found 346.34. (Spectra given, **Figure S72**).

## NMR spectra

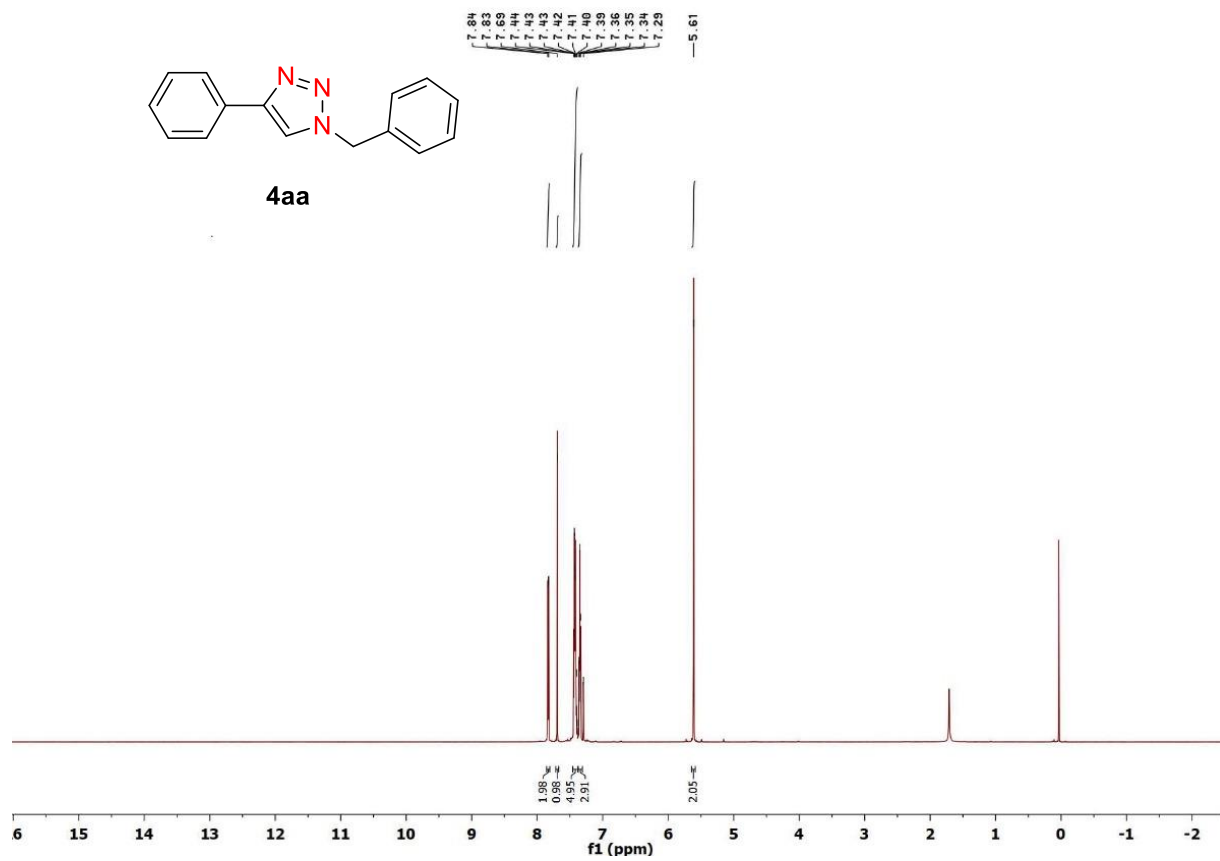

Fig. S3:  $^1\text{H}$  NMR (500 MHz,  $\text{CDCl}_3$ ) of the compound **4aa**.

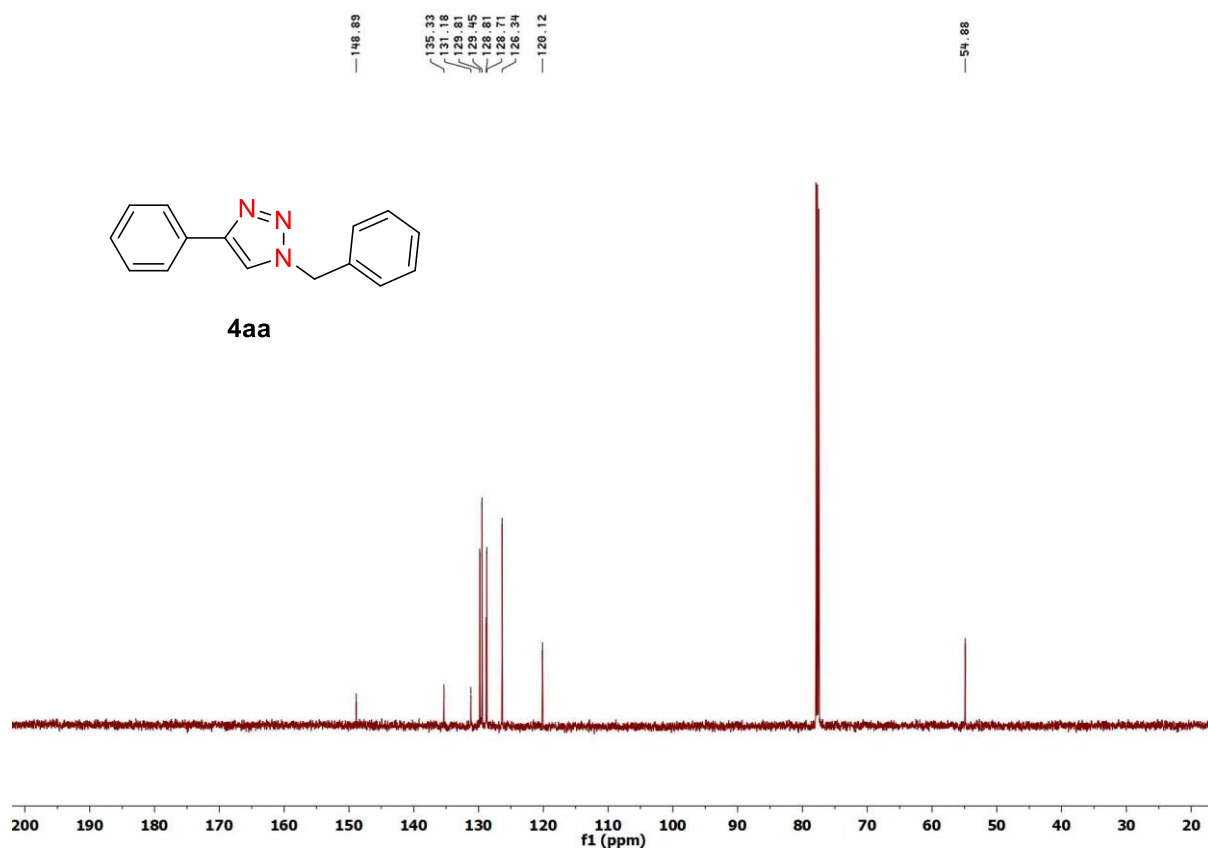

**Fig. S4:** <sup>13</sup>C NMR (125 MHz, CDCl<sub>3</sub>) of the compound **4aa**.

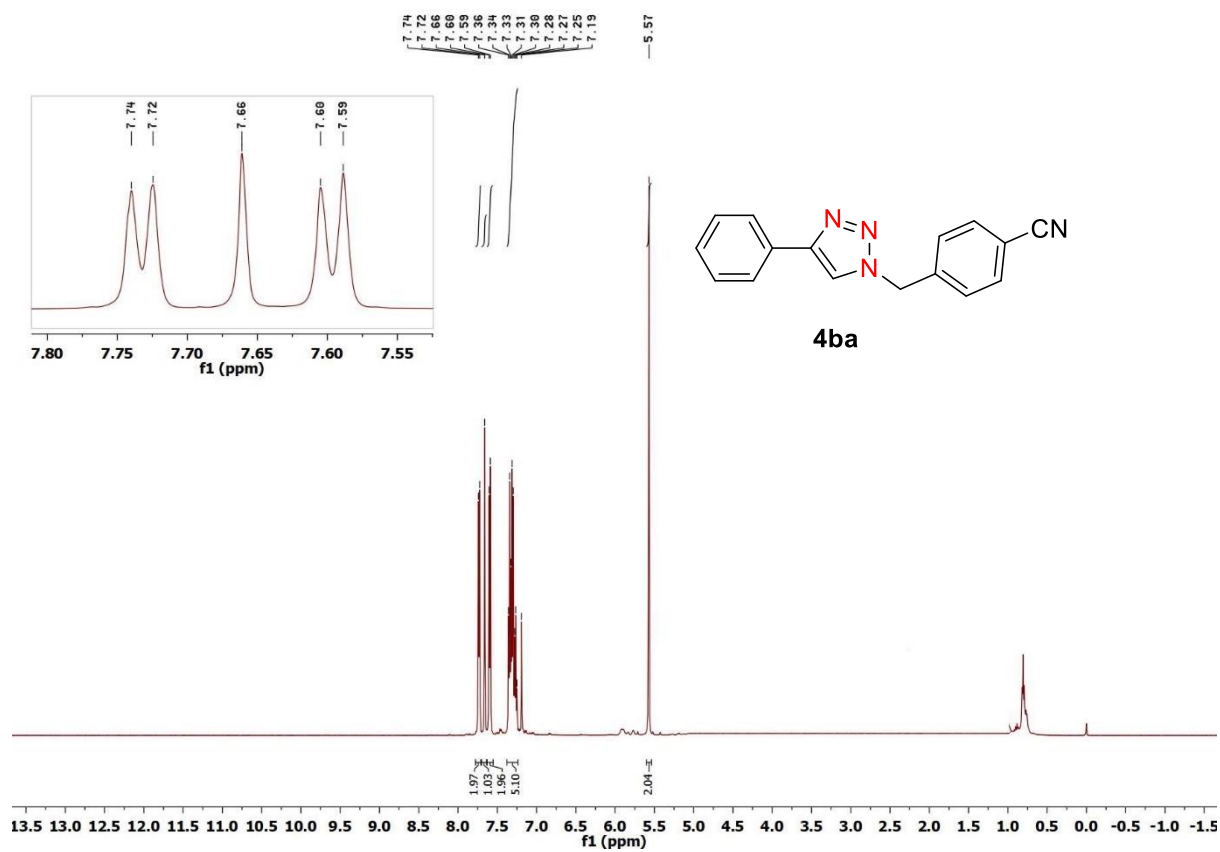

**Fig. S5:** <sup>1</sup>H NMR (500 MHz, CDCl<sub>3</sub>) of the compound **4ba**.

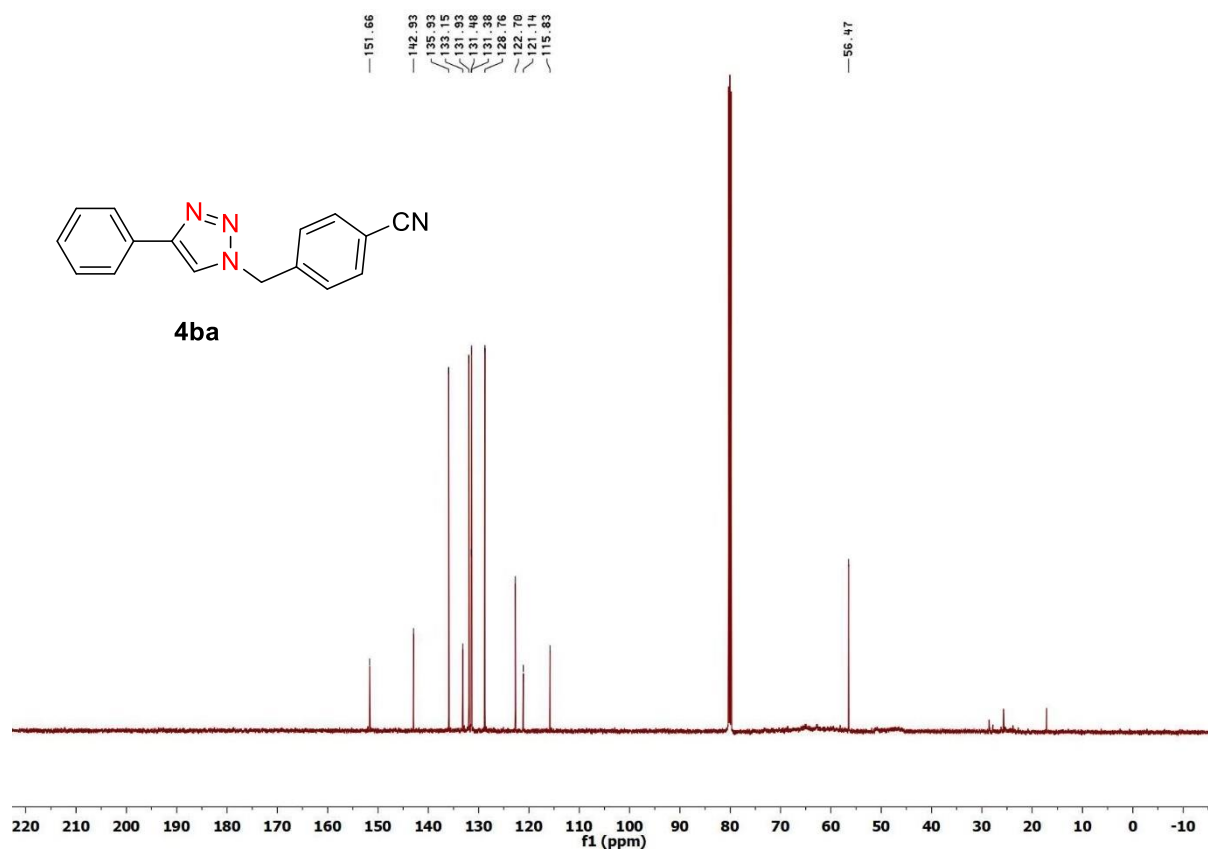

**Fig. S6:**  $^{13}\text{C}$  NMR (125 MHz,  $\text{CDCl}_3$ ) of the compound **4ba**.



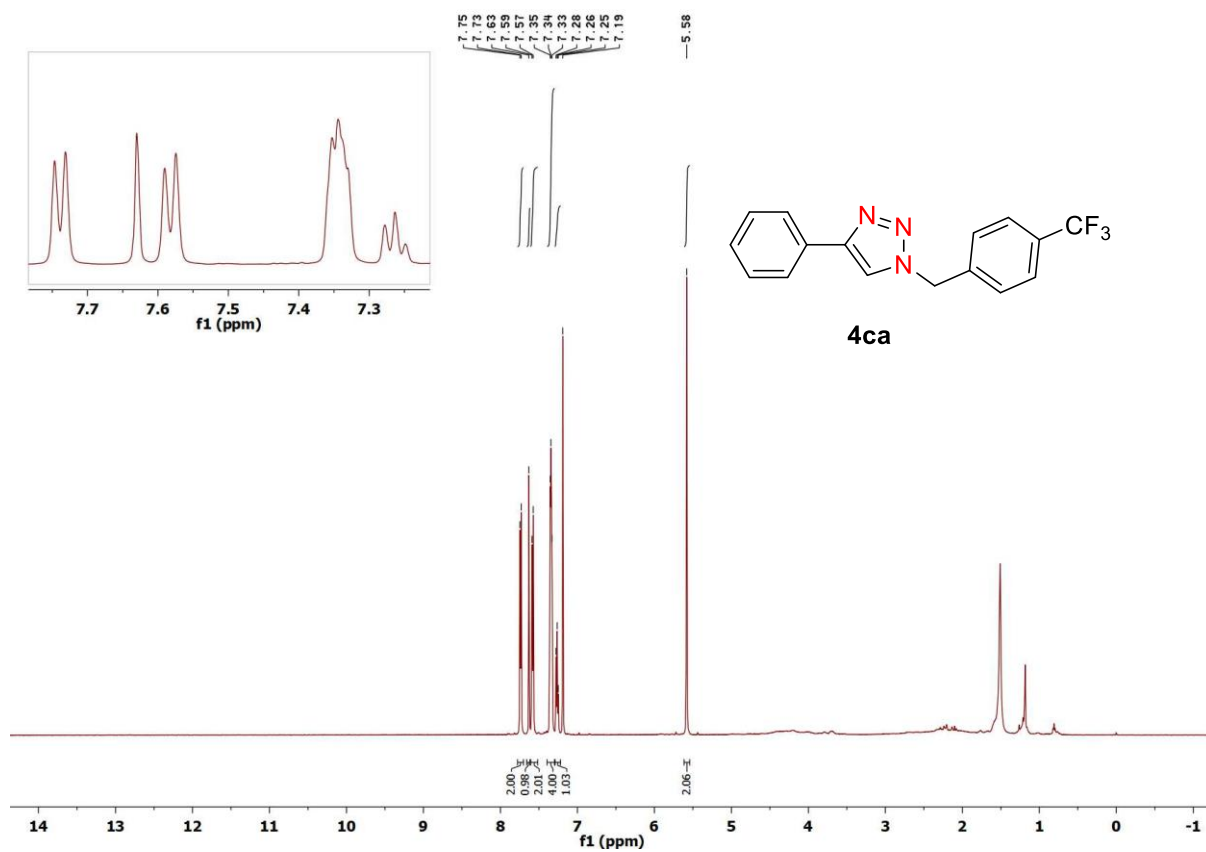

**Fig. S7:**  $^1\text{H}$  NMR (500 MHz,  $\text{CDCl}_3$ ) of the compound **4ca**.

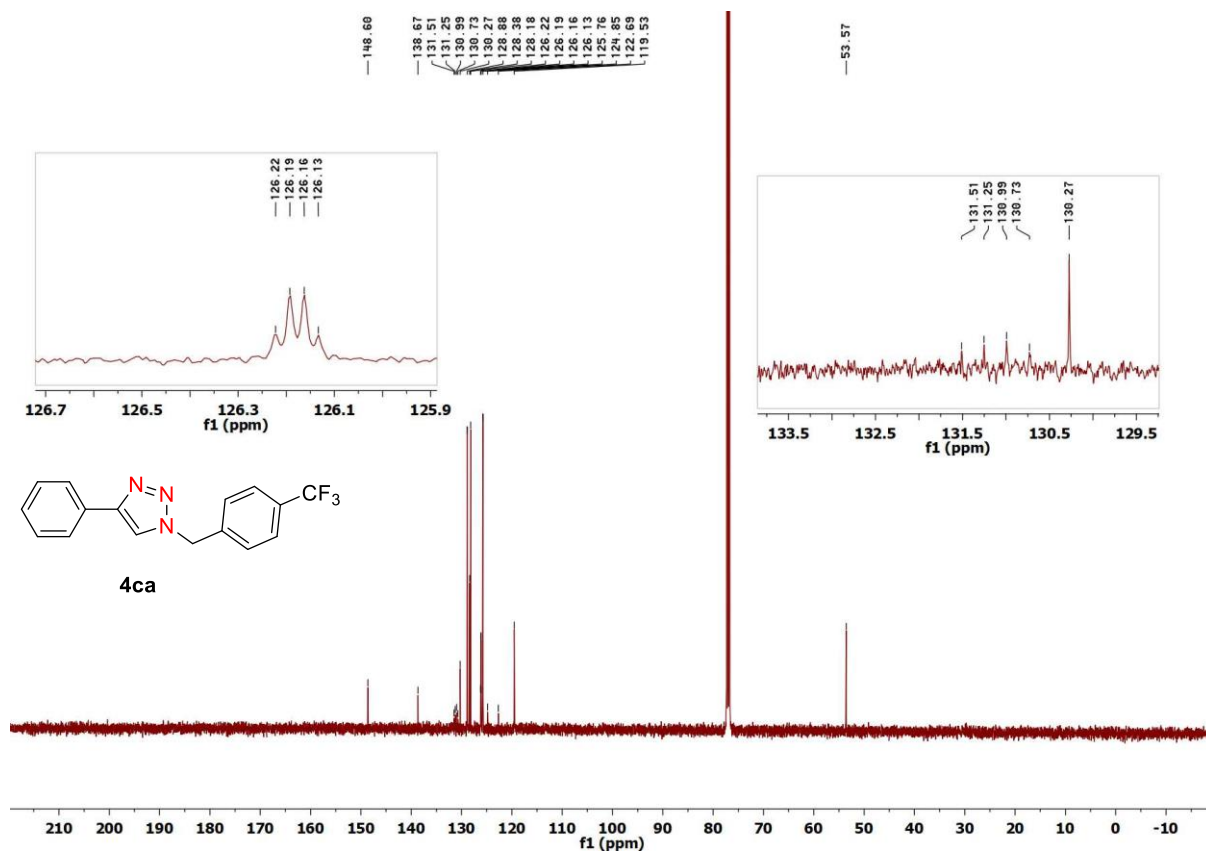

**Fig. S8:** <sup>13</sup>C NMR (125 MHz, CDCl<sub>3</sub>) of the compound **4ca**.

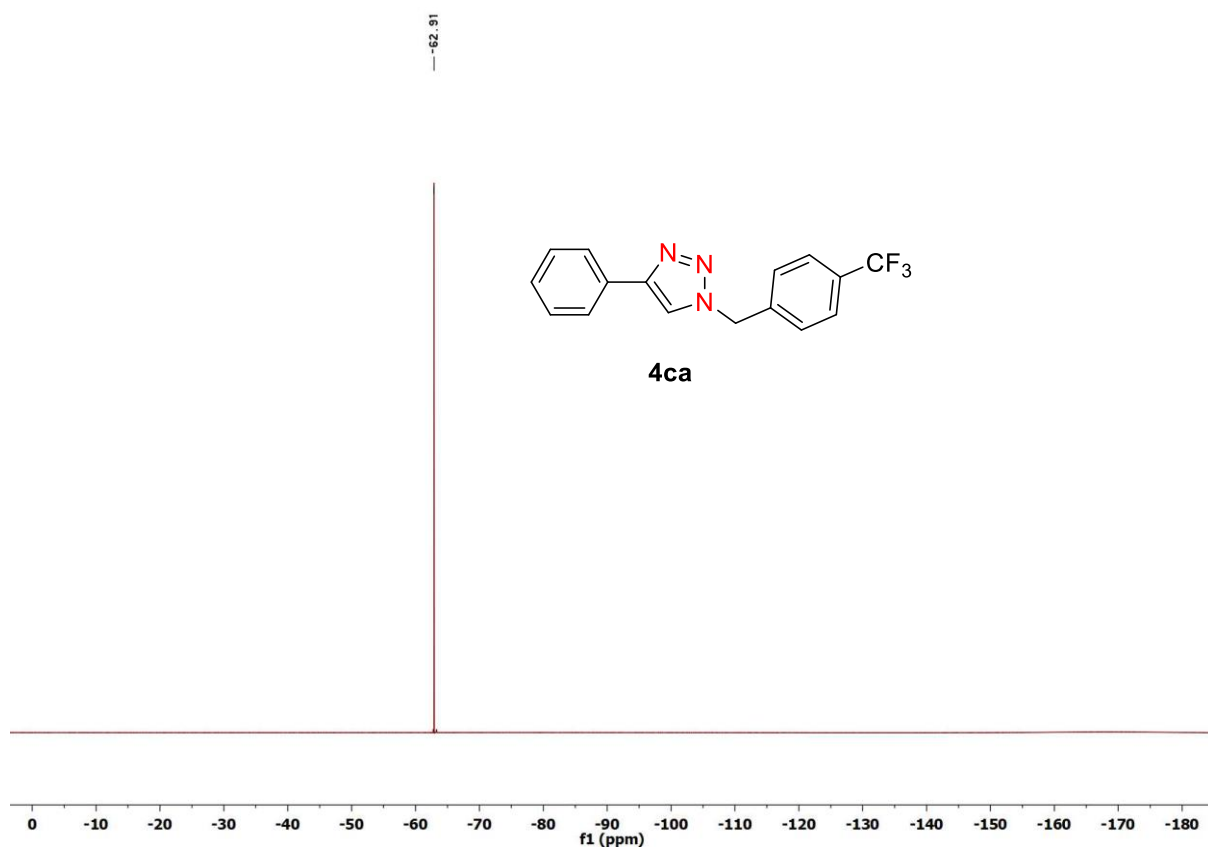

**Fig. S9:**  $^{19}\text{F}$  NMR (470 MHz,  $\text{CDCl}_3$ ) of the compound **4ca**.

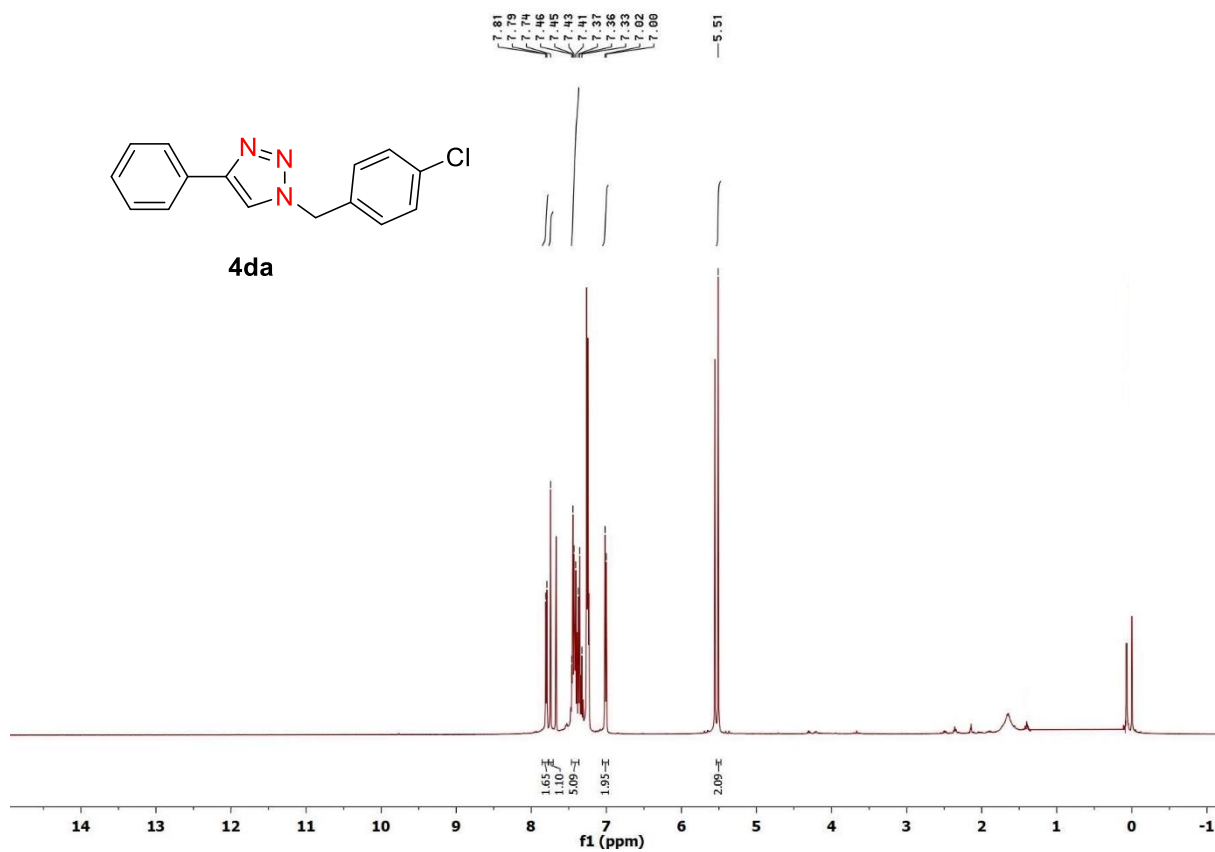

**Fig. S10:** <sup>1</sup>H NMR (500 MHz, CDCl<sub>3</sub>) of the compound **4da**.

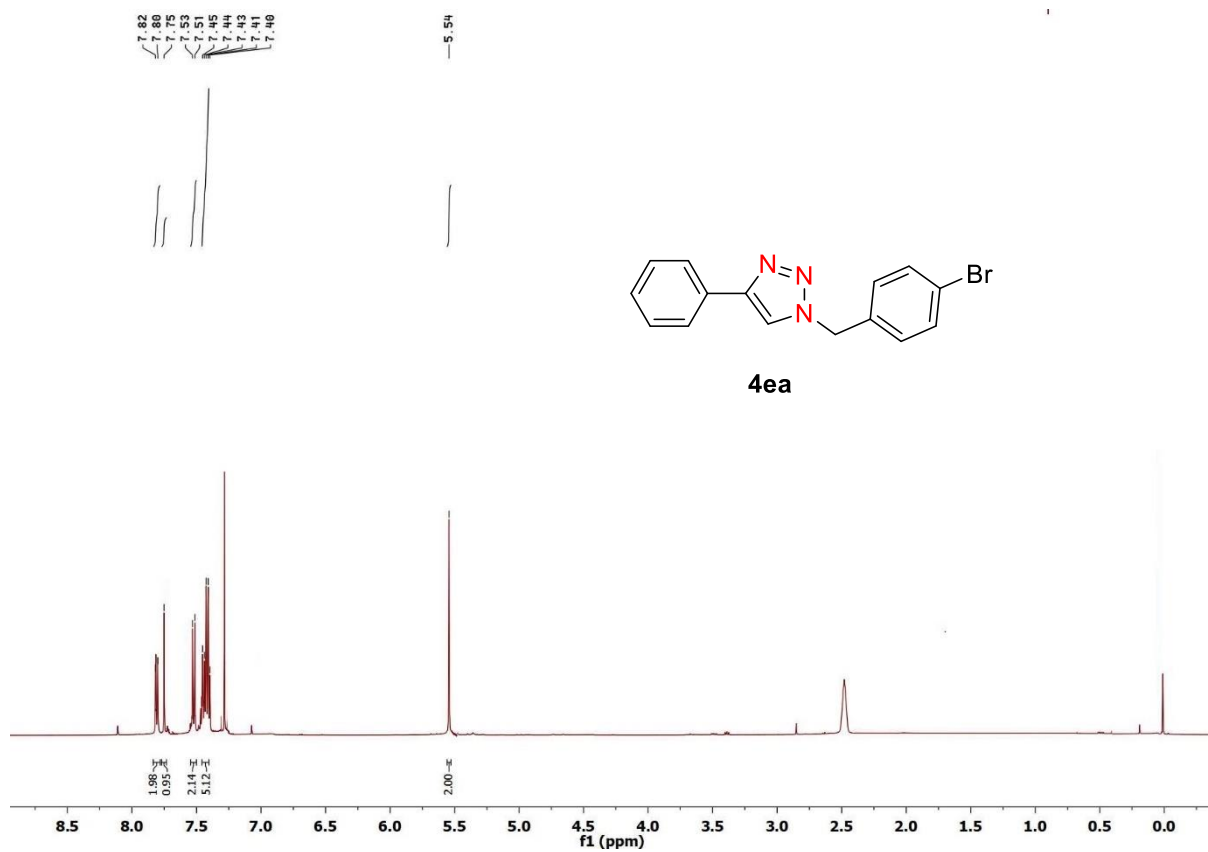

Fig. S11: <sup>1</sup>H NMR (500 MHz, CDCl<sub>3</sub>) of the compound 4ea.



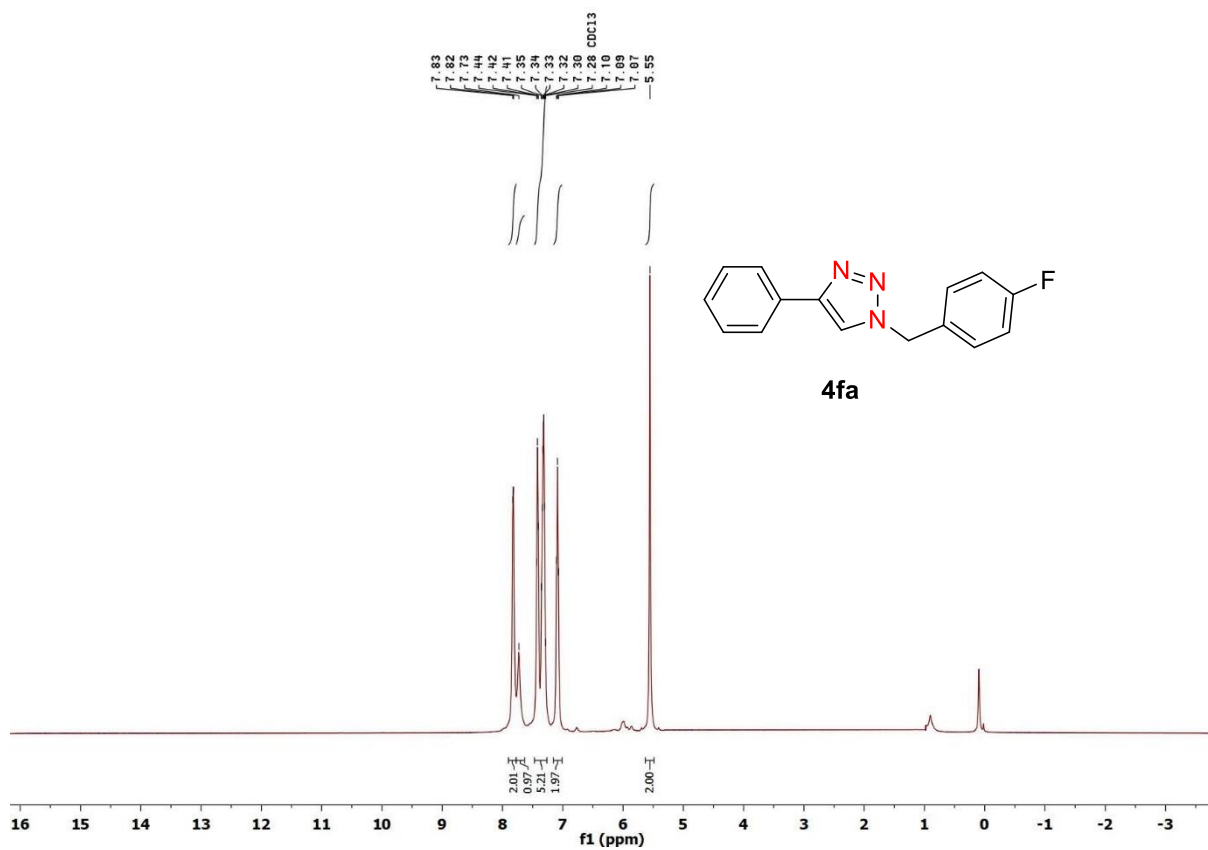

Fig. S13:  $^1\text{H}$  NMR (500 MHz,  $\text{CDCl}_3$ ) of the compound **4fa**.

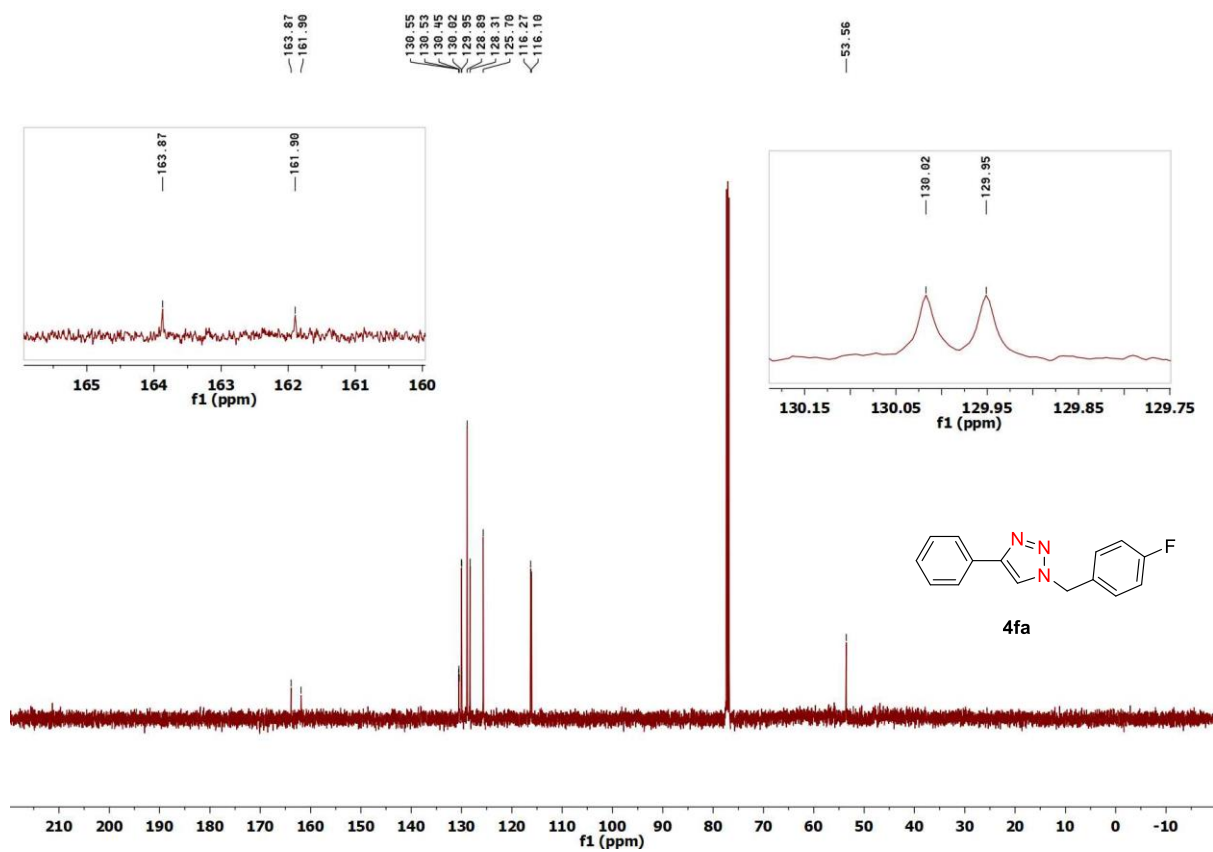

**Fig. S14:** <sup>13</sup>C NMR (125 MHz, CDCl<sub>3</sub>) of the compound **4fa**.



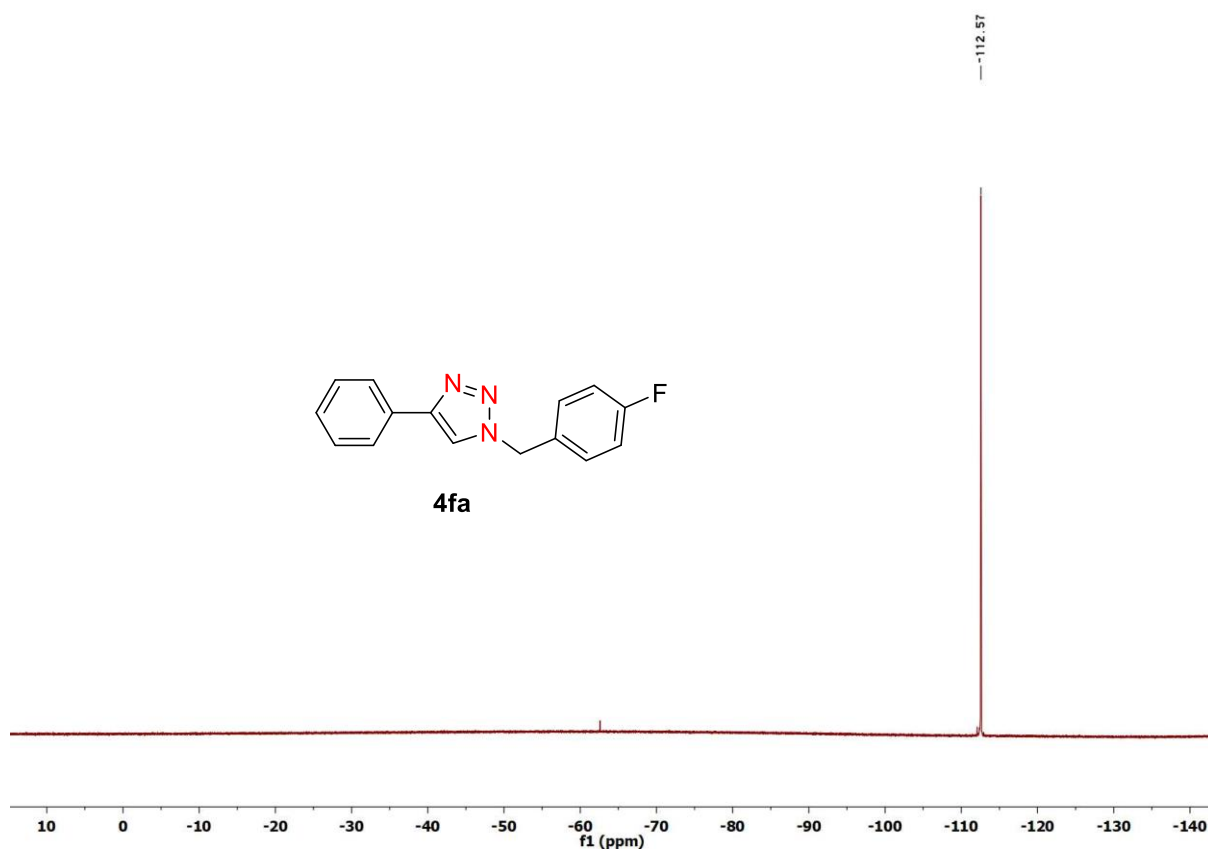

**Fig. S15:**  $^{19}\text{F}$  NMR (470 MHz,  $\text{CDCl}_3$ ) of the compound **4fa**.

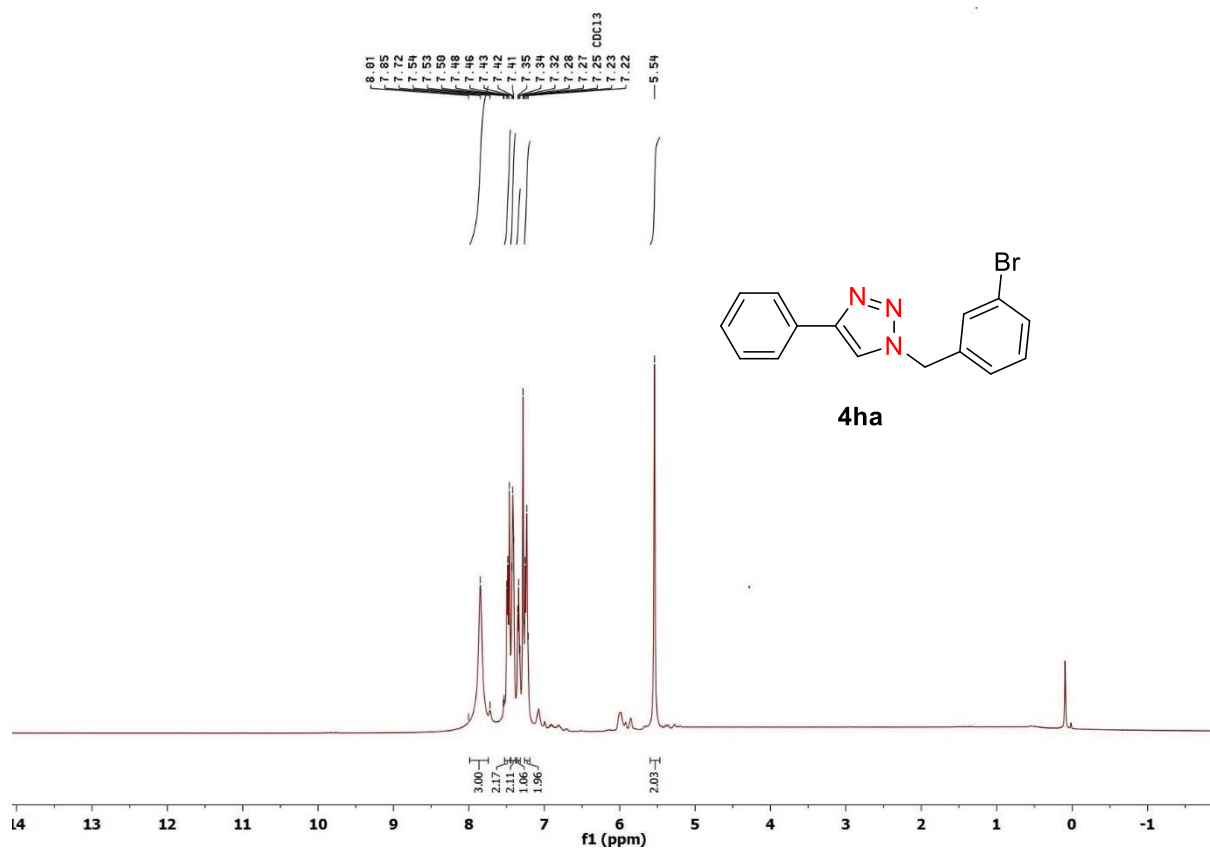

**Fig. S16:** <sup>1</sup>H NMR (500 MHz, CDCl<sub>3</sub>) of the compound **4ha**.

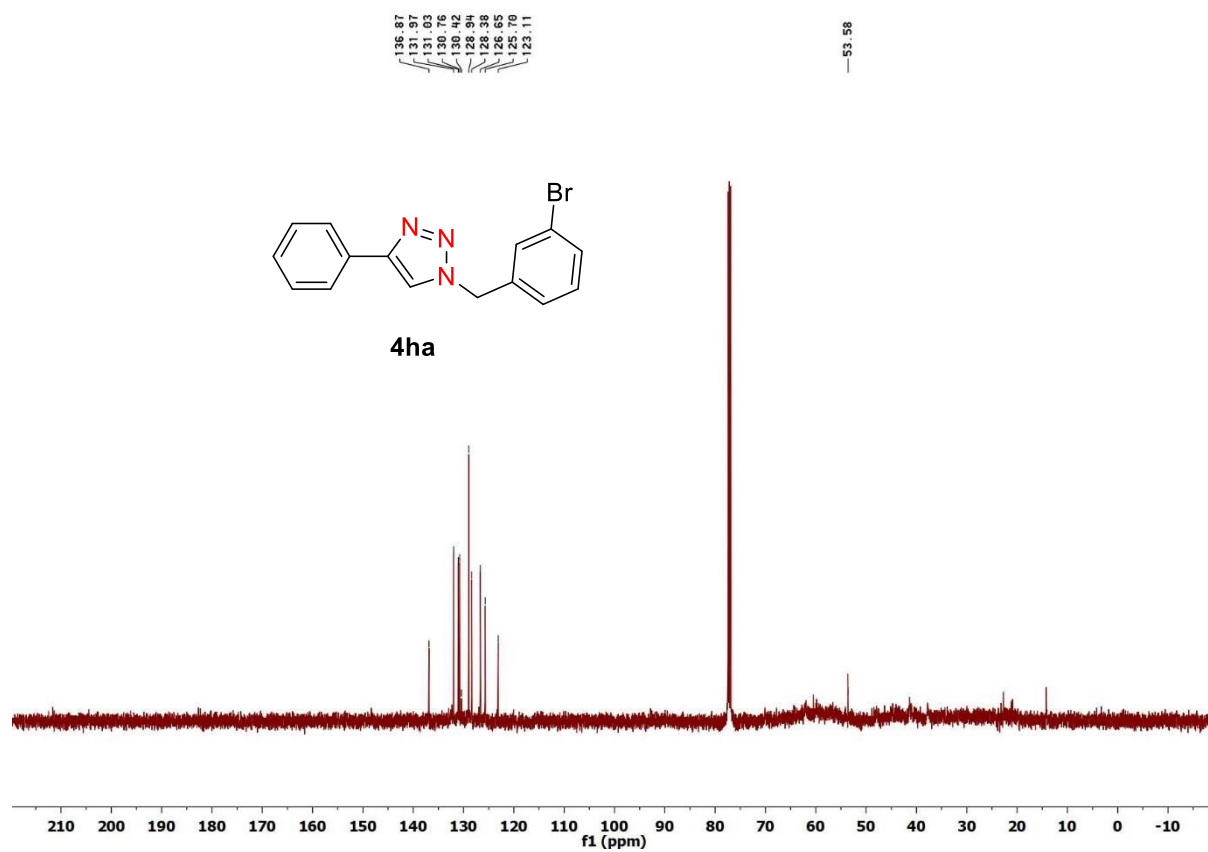

**Fig. S17:**  $^{13}\text{C}$  NMR (125 MHz,  $\text{CDCl}_3$ ) of the compound **4ha**.

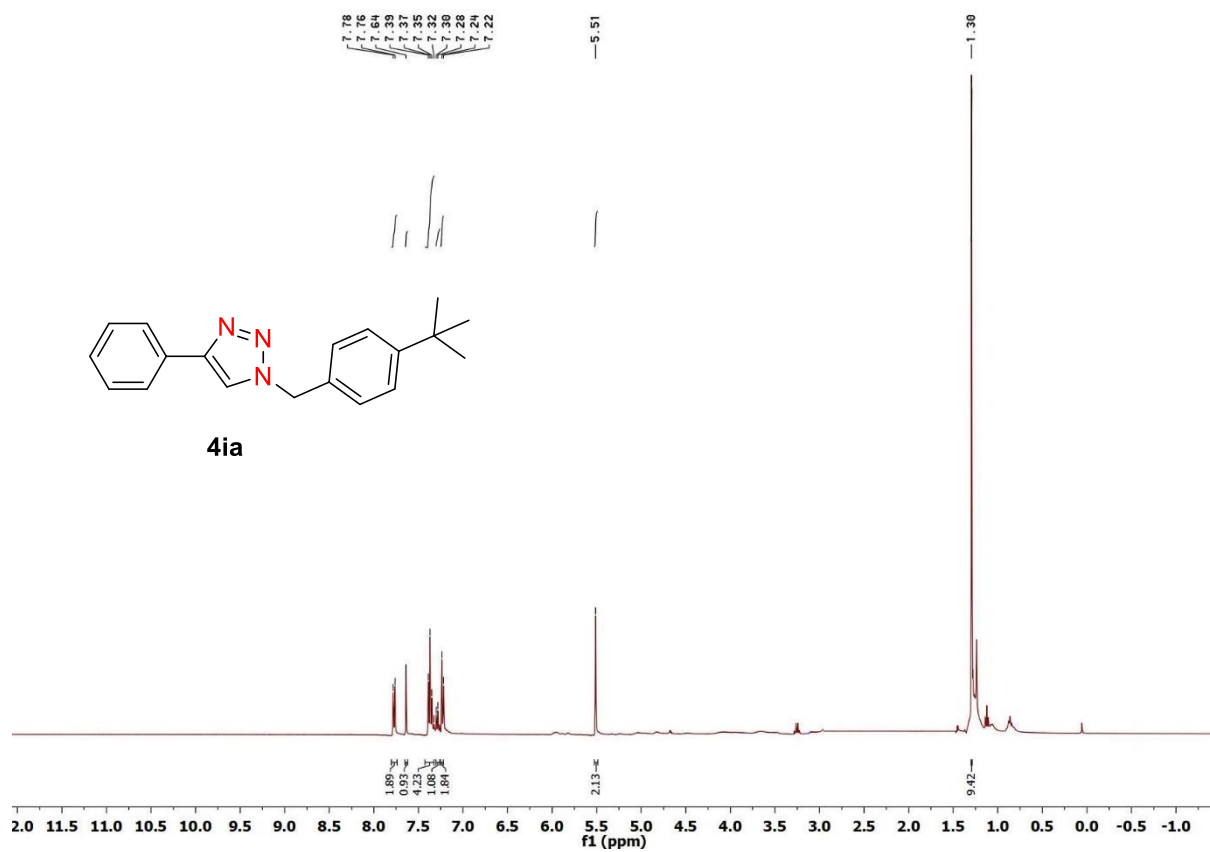

**Fig. S18:** <sup>1</sup>H NMR (500 MHz, CDCl<sub>3</sub>) of the compound **4ia**.

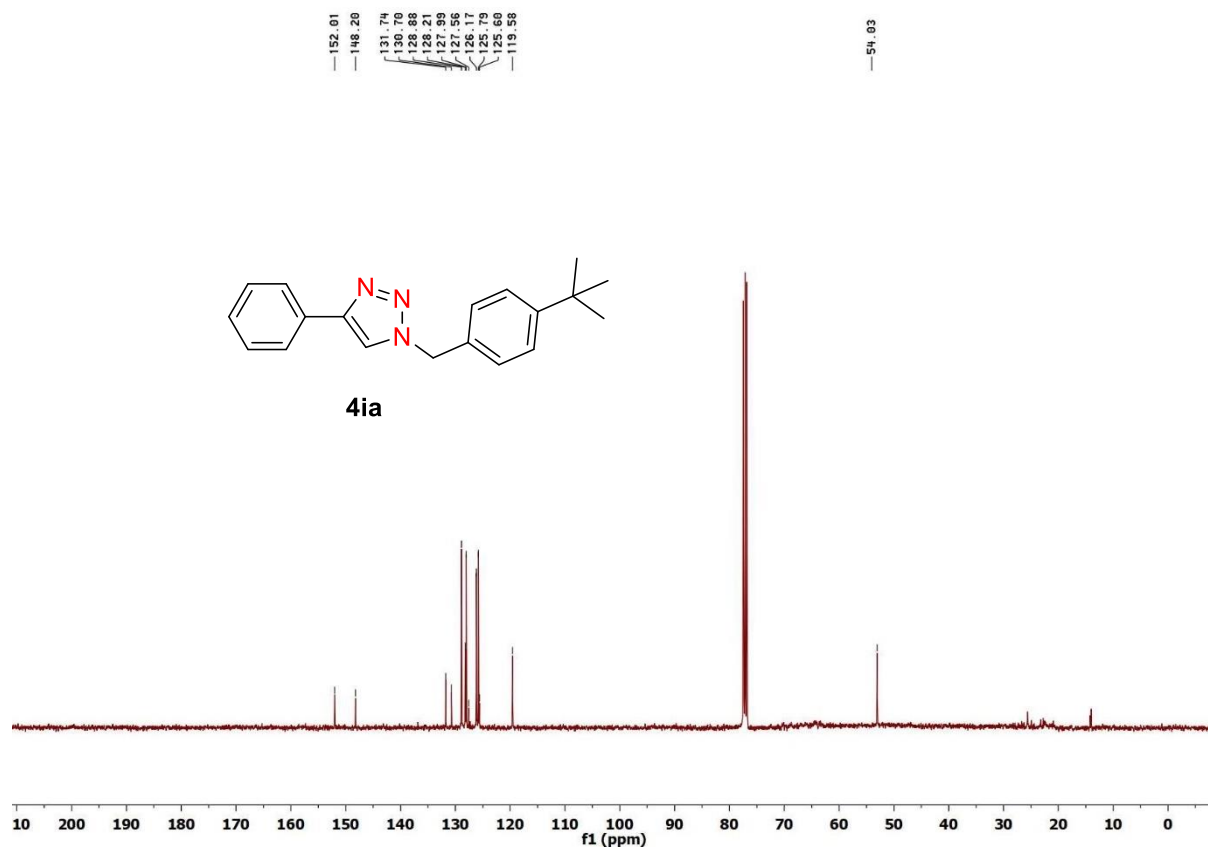

**Fig. S19:**  $^{13}\text{C}$  NMR (125 MHz,  $\text{CDCl}_3$ ) of the compound **4ia**.

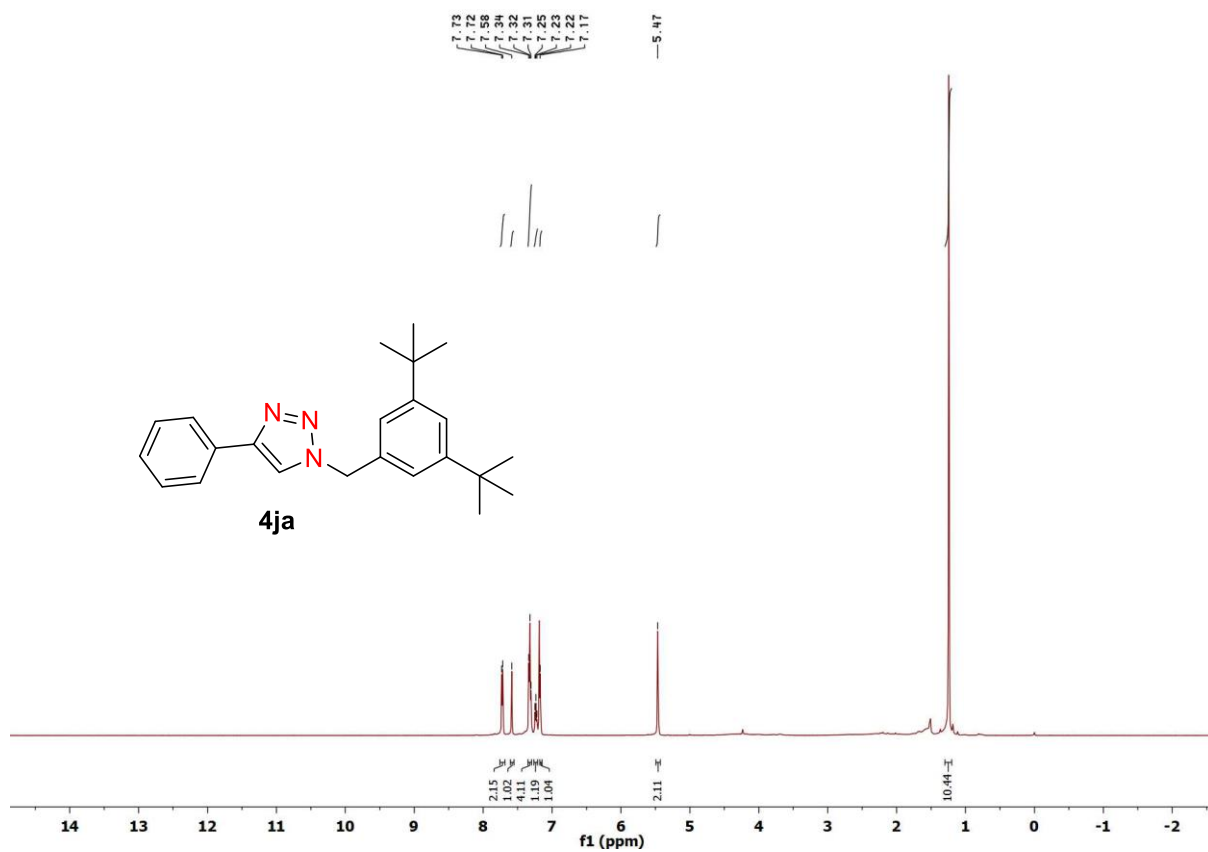

**Fig. S20:**  $^1\text{H NMR}$  (500 MHz,  $\text{CDCl}_3$ ) of the compound **4ja**.

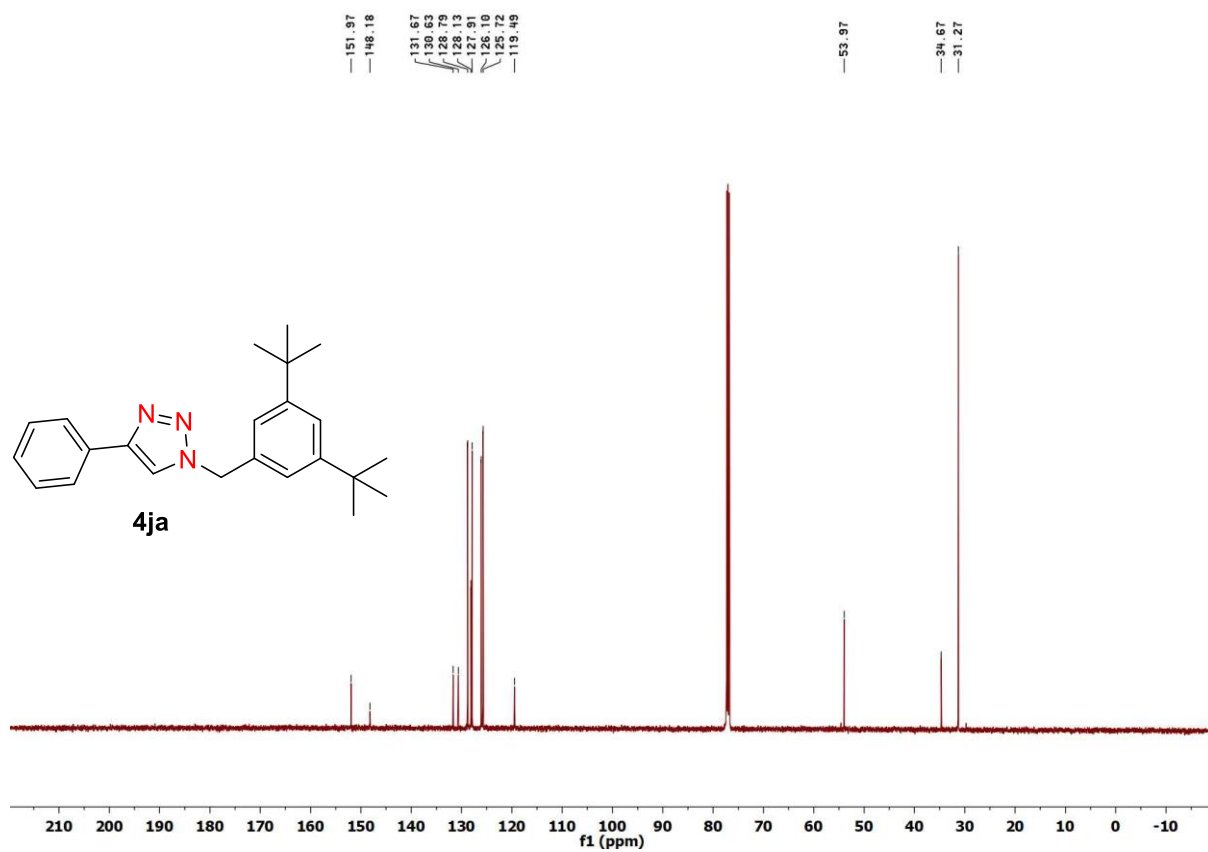

**Fig. S21:**  $^{13}\text{C}$  NMR (125 MHz,  $\text{CDCl}_3$ ) of the compound **4ja**.

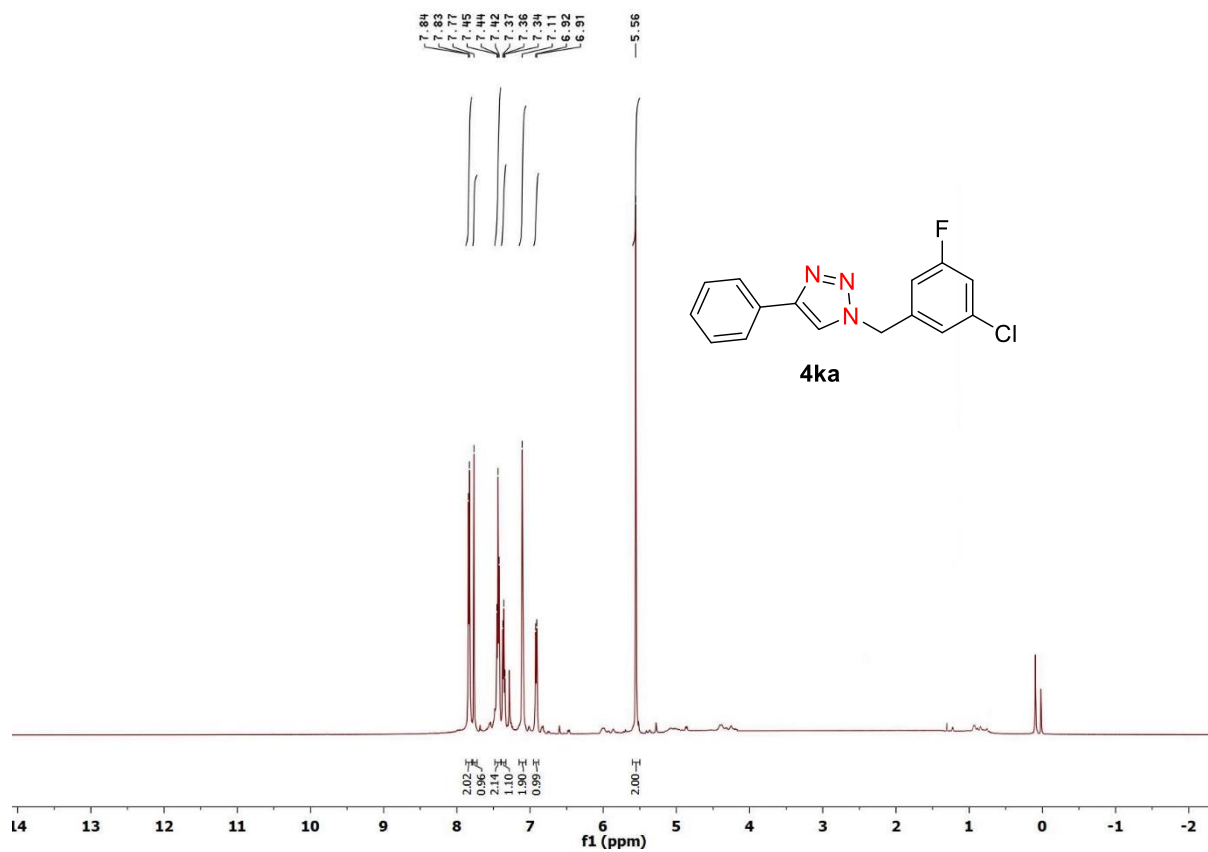

Fig. S22:  $^1\text{H}$  NMR (500 MHz,  $\text{CDCl}_3$ ) of the compound **4ka**.



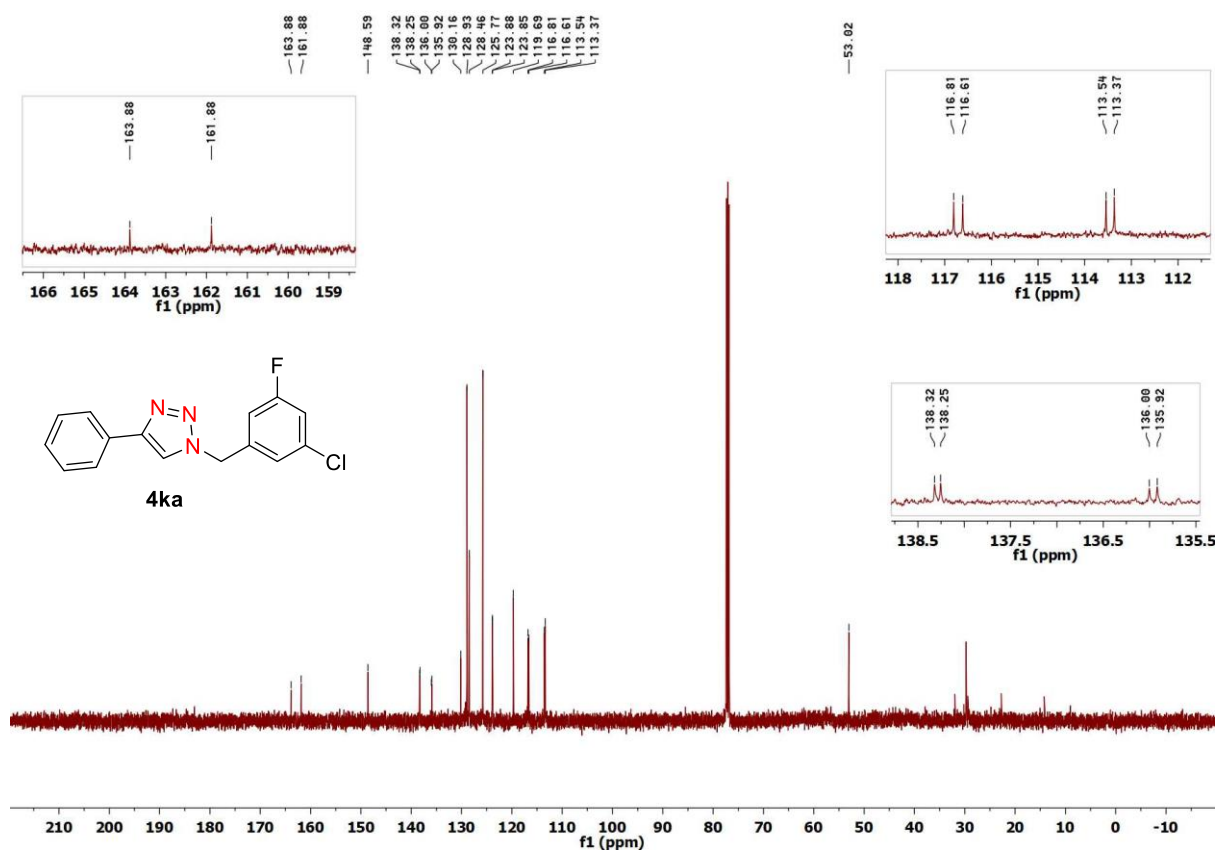

**Fig. S23:** <sup>13</sup>C NMR (125 MHz, CDCl<sub>3</sub>) of the compound **4ka**.

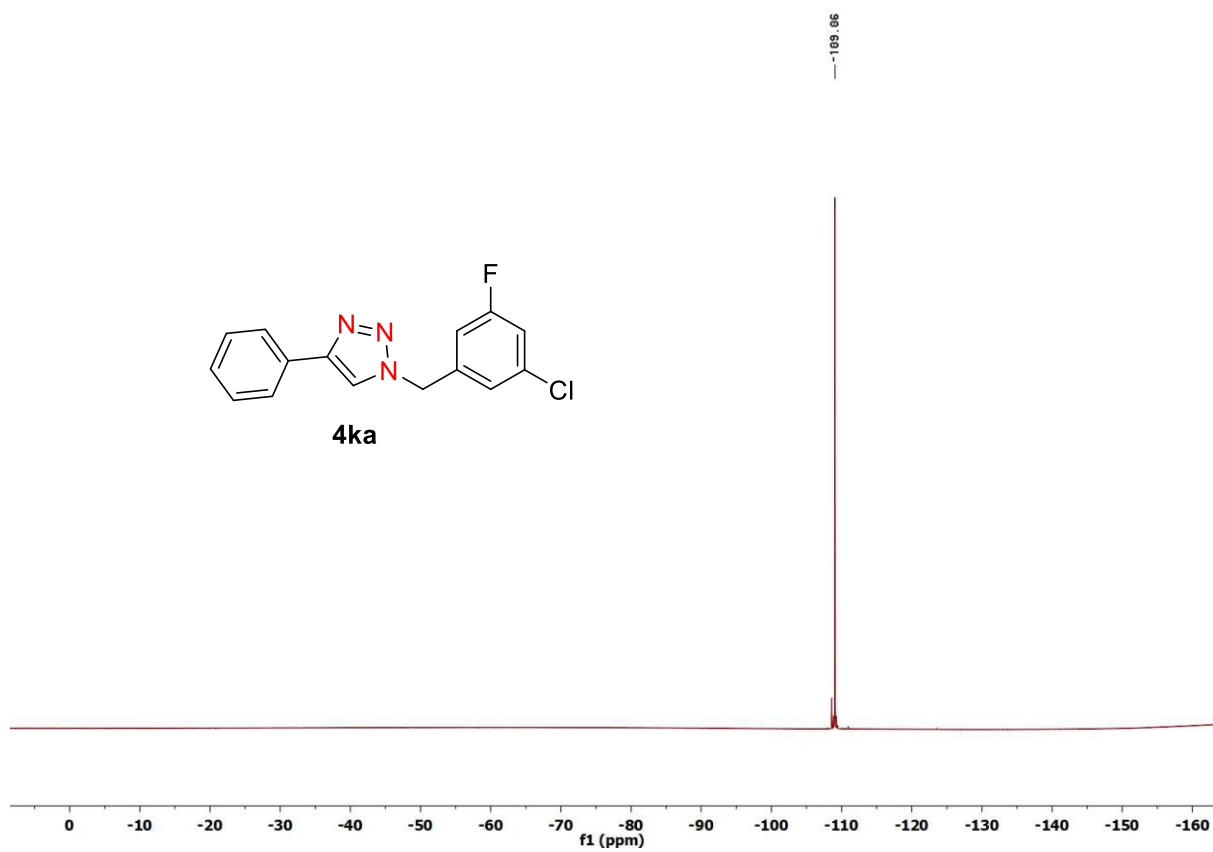

**Fig. S24:**  $^{19}\text{F}$  NMR (470 MHz,  $\text{CDCl}_3$ ) of the compound **4ka**.

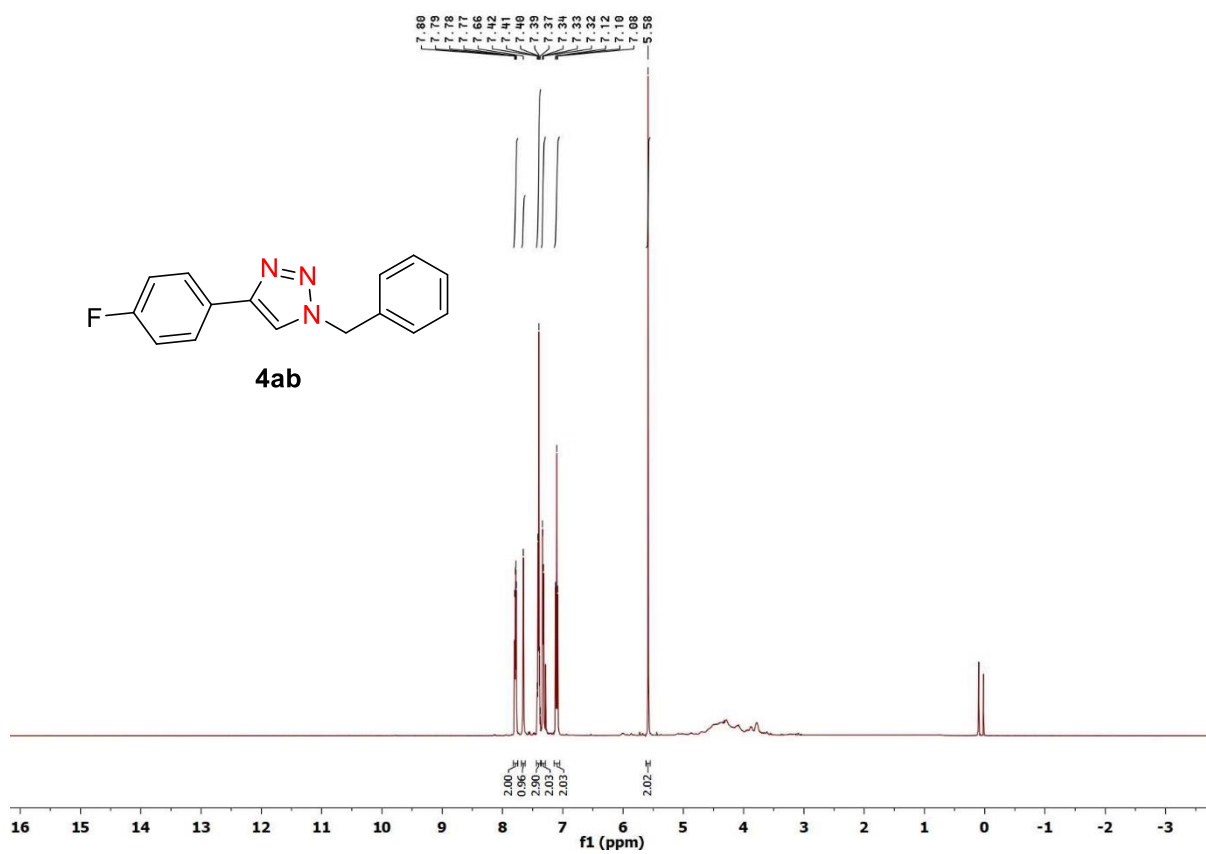

**Fig. S25:** <sup>1</sup>H NMR (500 MHz, CDCl<sub>3</sub>) of the compound **4ab**.

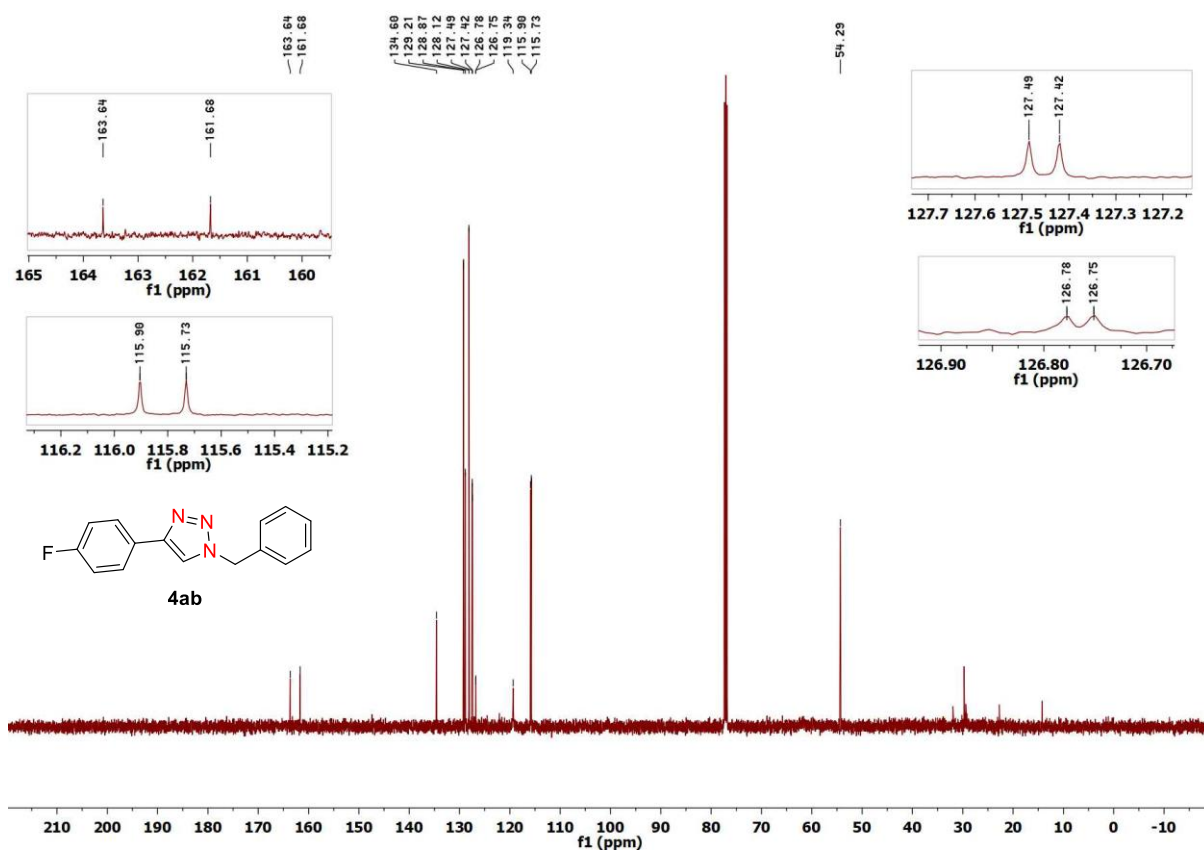

**Fig. S26:** <sup>13</sup>C NMR (125 MHz, CDCl<sub>3</sub>) of the compound **4ab**.

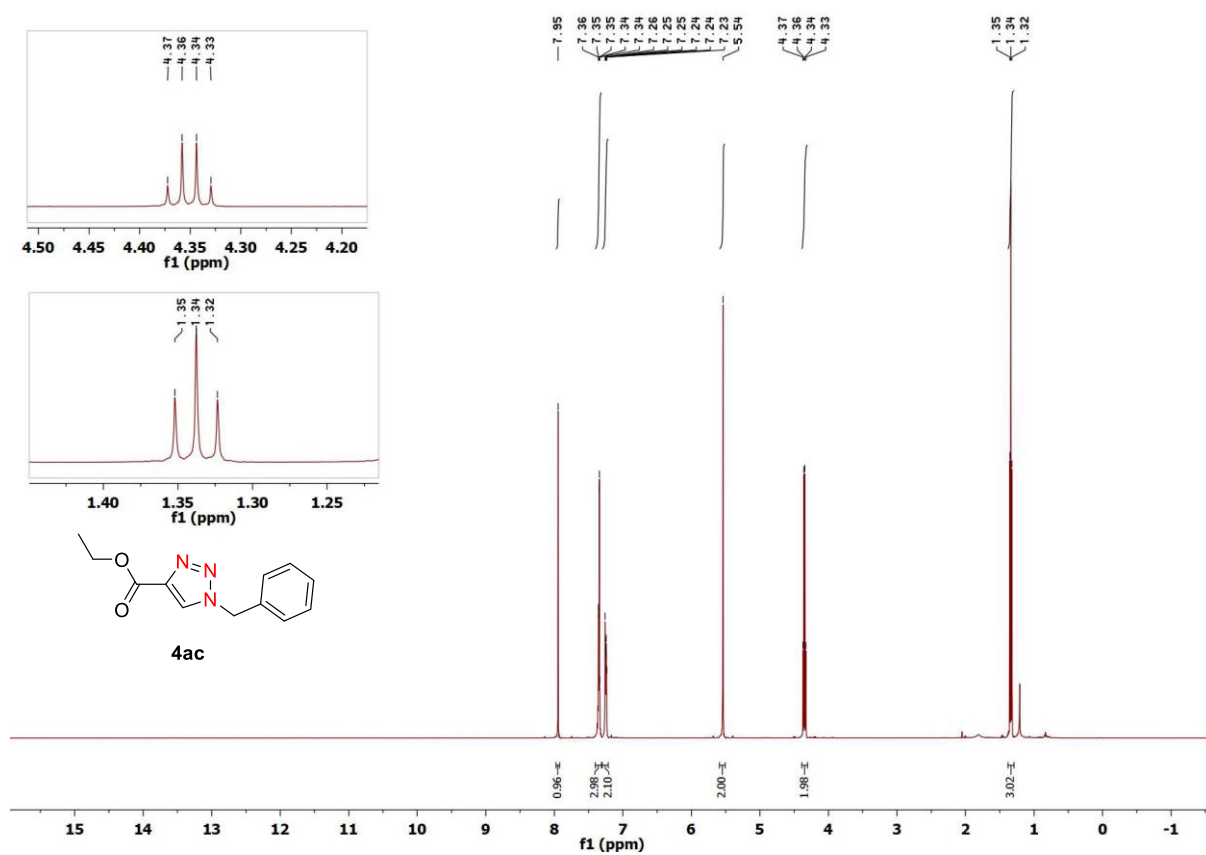

**Fig. S27:**  $^1\text{H}$  NMR (500 MHz,  $\text{CDCl}_3$ ) of the compound **4ac**.

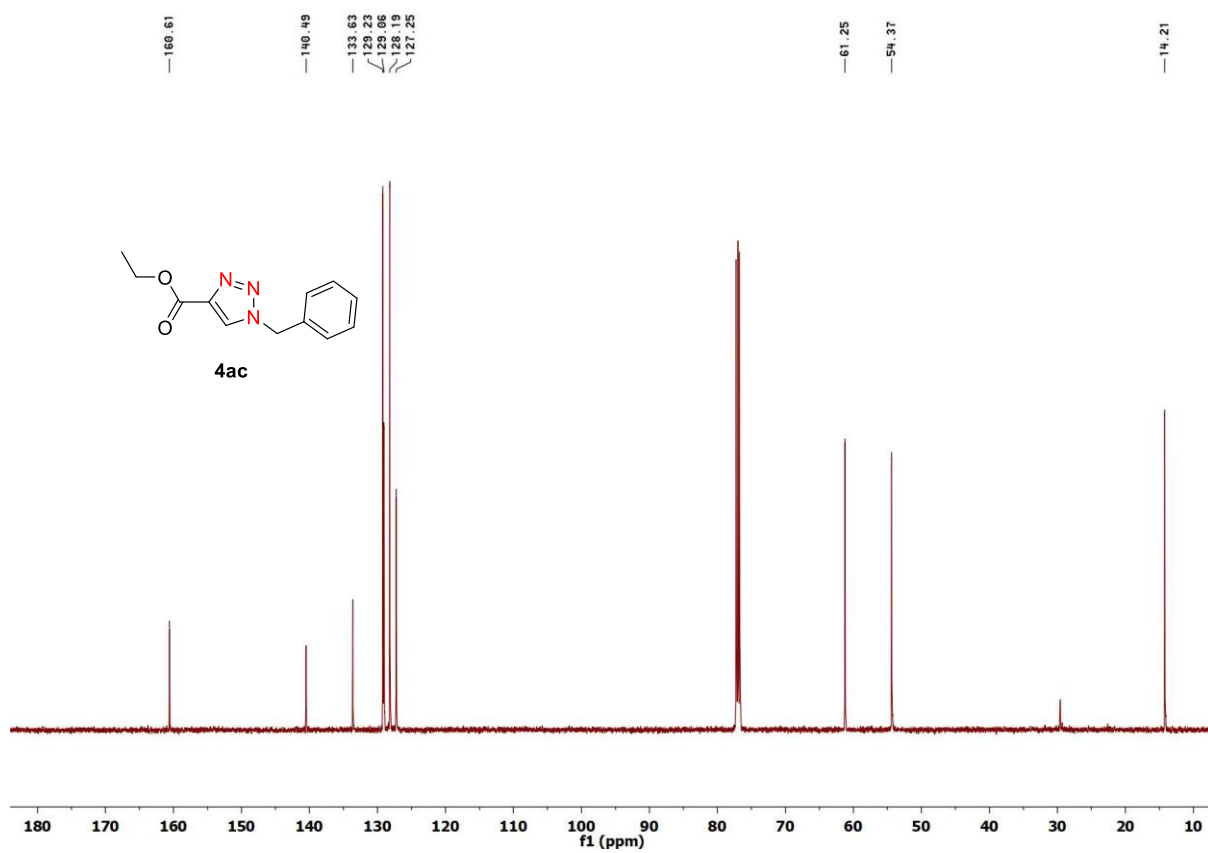

**Fig. S28:**  $^{13}\text{C}$  NMR (125 MHz,  $\text{CDCl}_3$ ) of the compound **4ac**.

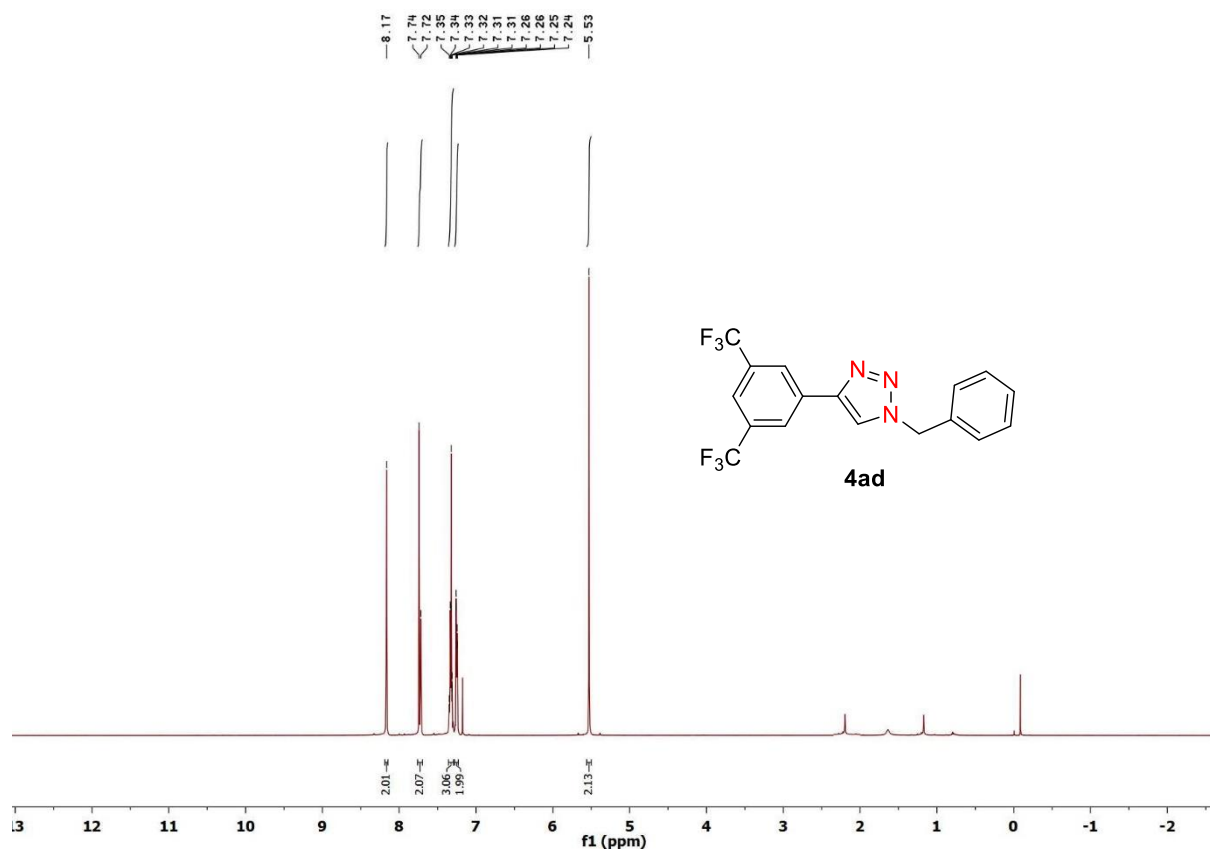

**Fig. S29:** <sup>1</sup>H NMR (500 MHz, CDCl<sub>3</sub>) of the compound **4ad**.

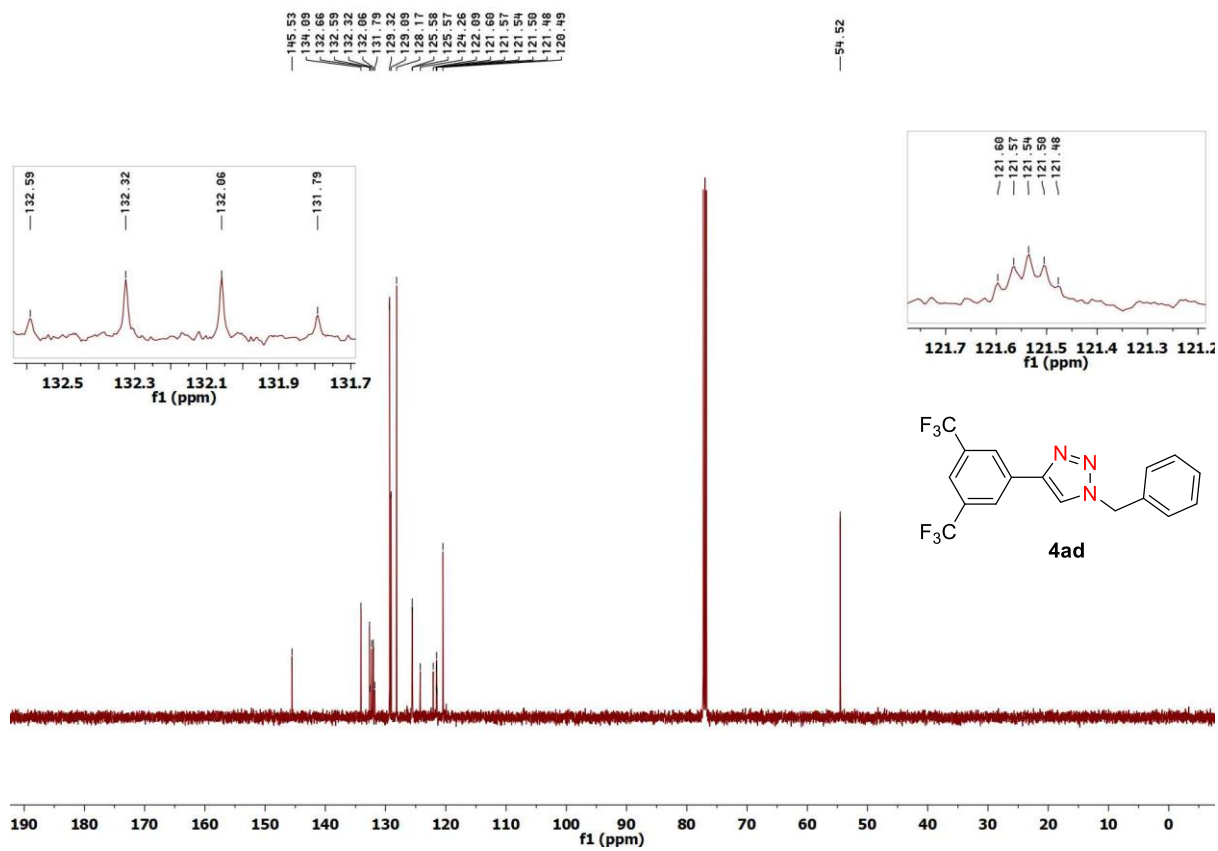

**Fig. S30:** <sup>13</sup>C NMR (125 MHz, CDCl<sub>3</sub>) of the compound **4ad**.



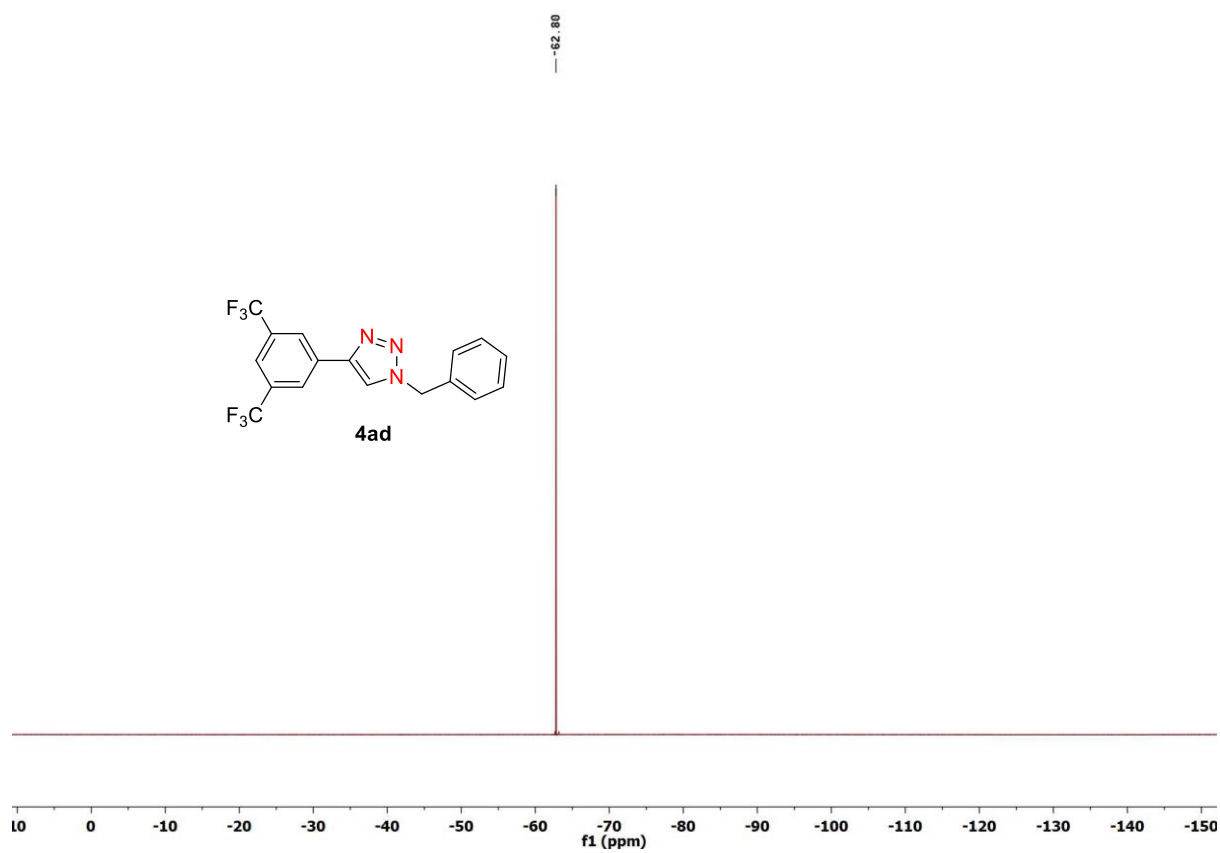

**Fig. S31:**  $^{19}\text{F}$  NMR (470 MHz,  $\text{CDCl}_3$ ) of the compound **4ad**.

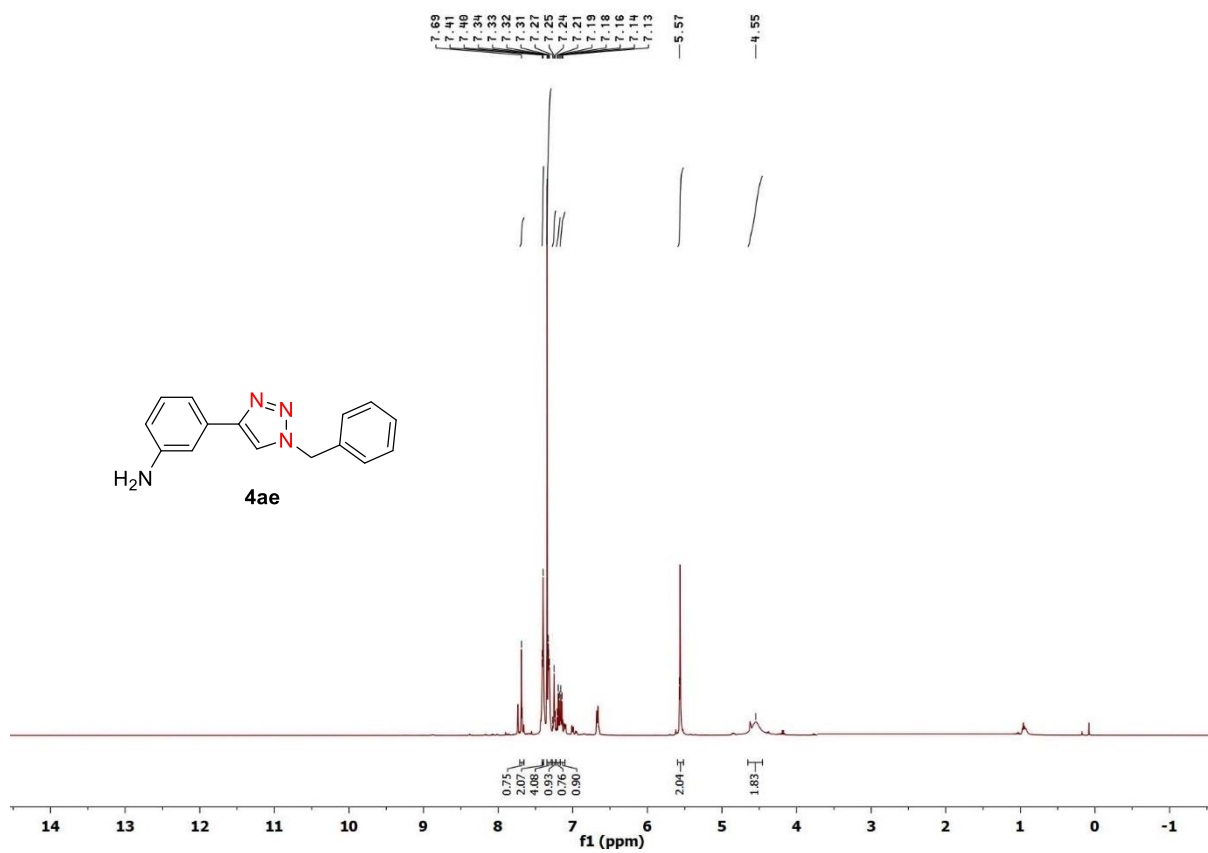

**Fig. S32:** <sup>1</sup>H NMR (500 MHz, CDCl<sub>3</sub>) of the compound **4ae**.

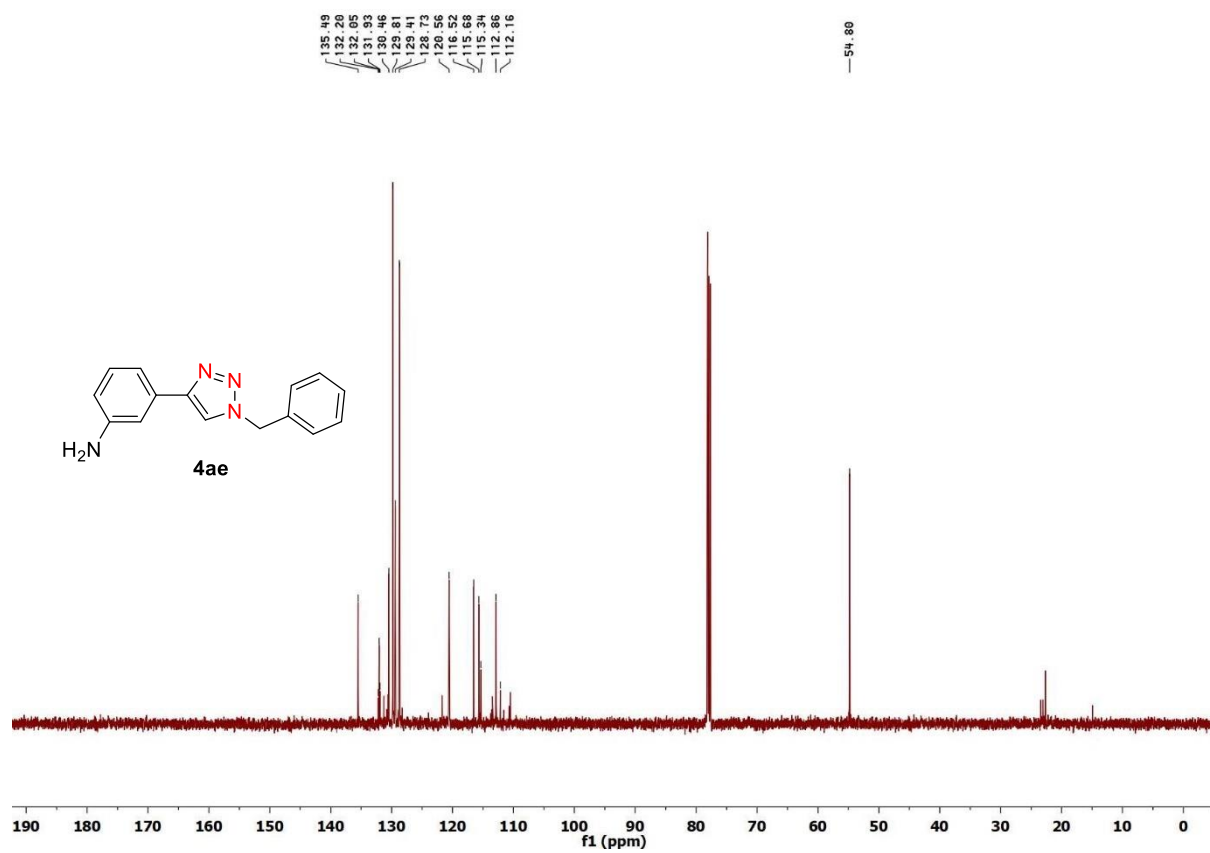

**Fig. S33:** <sup>13</sup>C NMR (125 MHz, CDCl<sub>3</sub>) of the compound **4ae**.

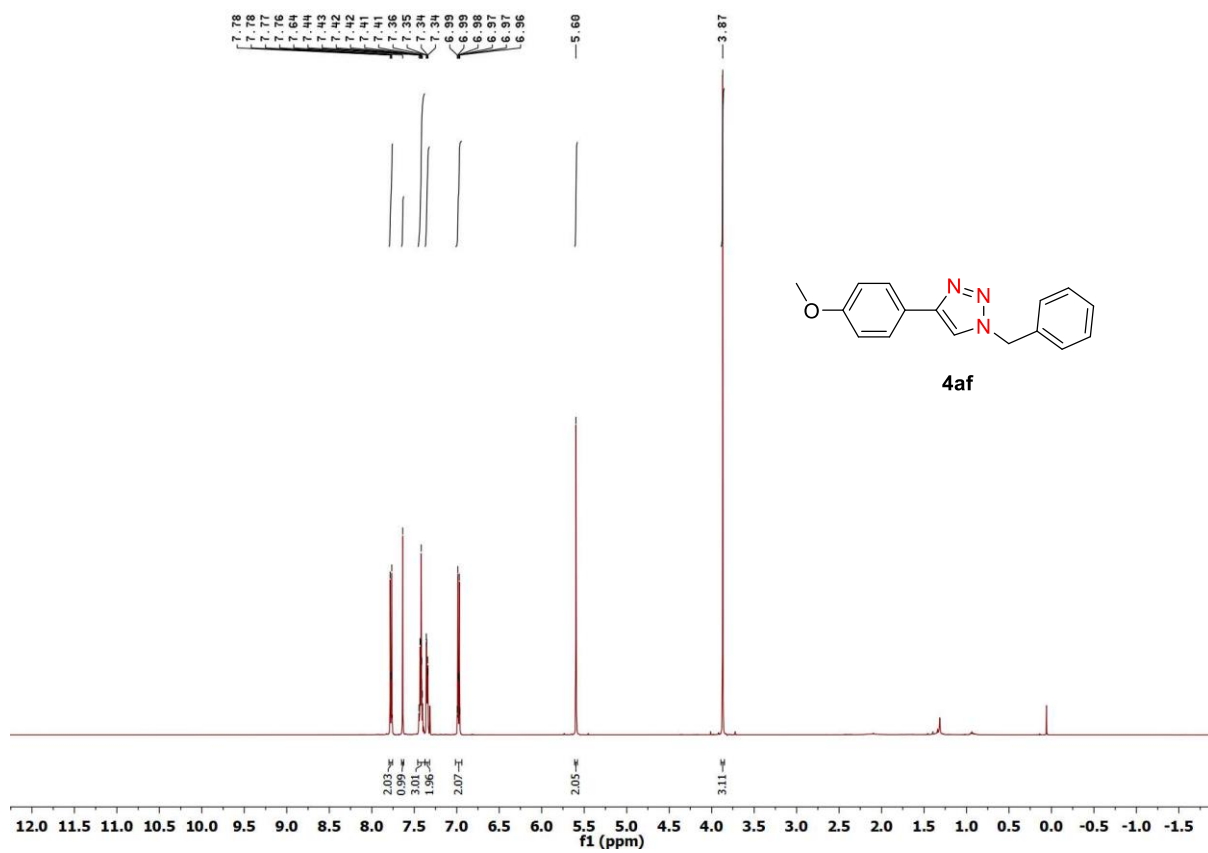

**Fig. S34:** <sup>1</sup>H NMR (500 MHz, CDCl<sub>3</sub>) of the compound **4af**.

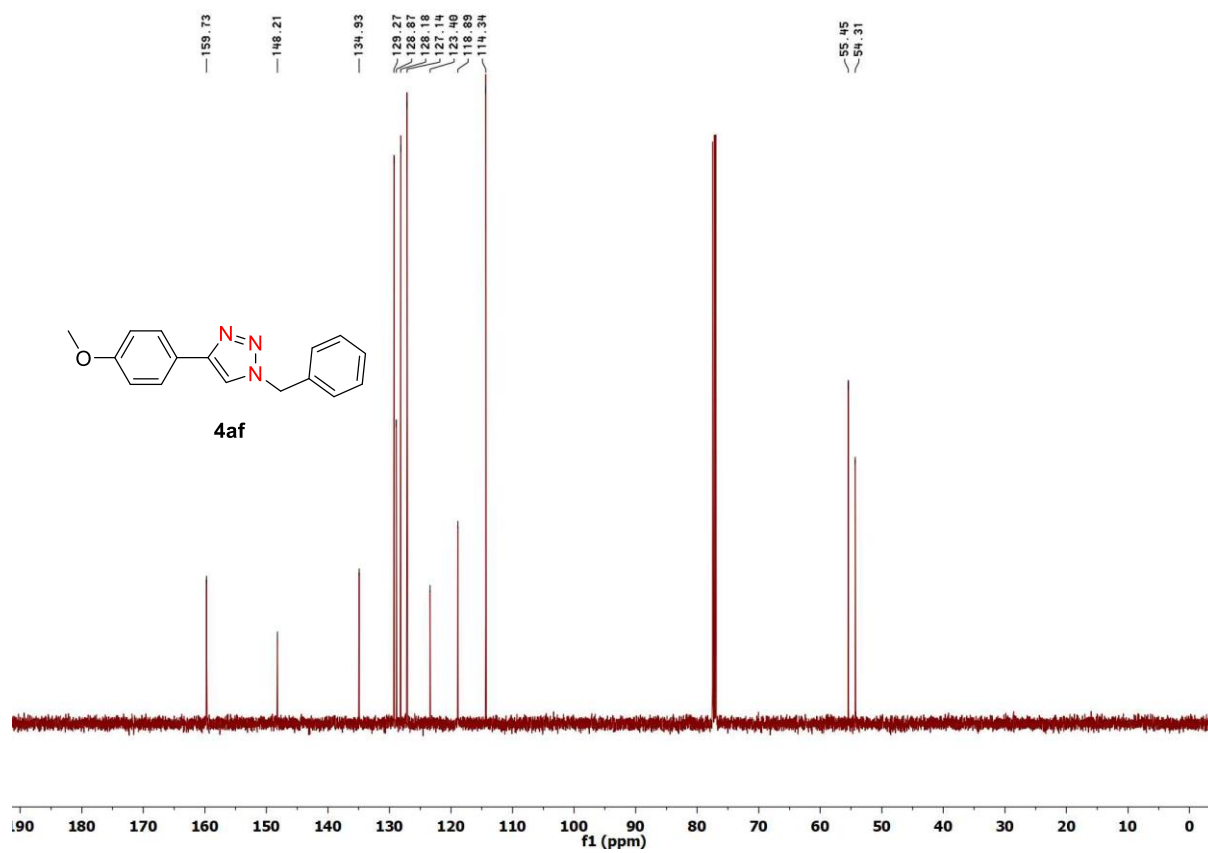

**Fig. S35:** <sup>13</sup>C NMR (125 MHz, CDCl<sub>3</sub>) of the compound **4af**.

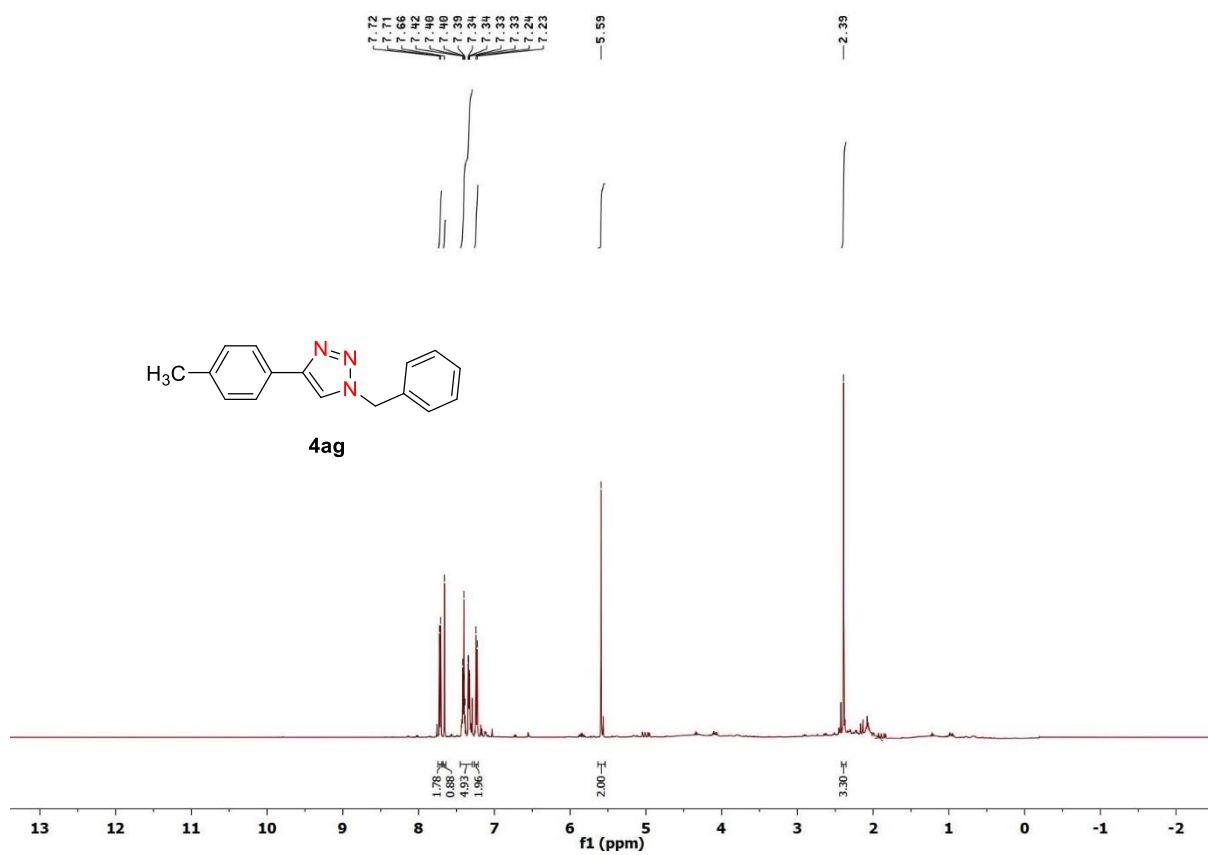

**Fig. S36:** <sup>1</sup>H NMR (500 MHz, CDCl<sub>3</sub>) of the compound **4ag**.

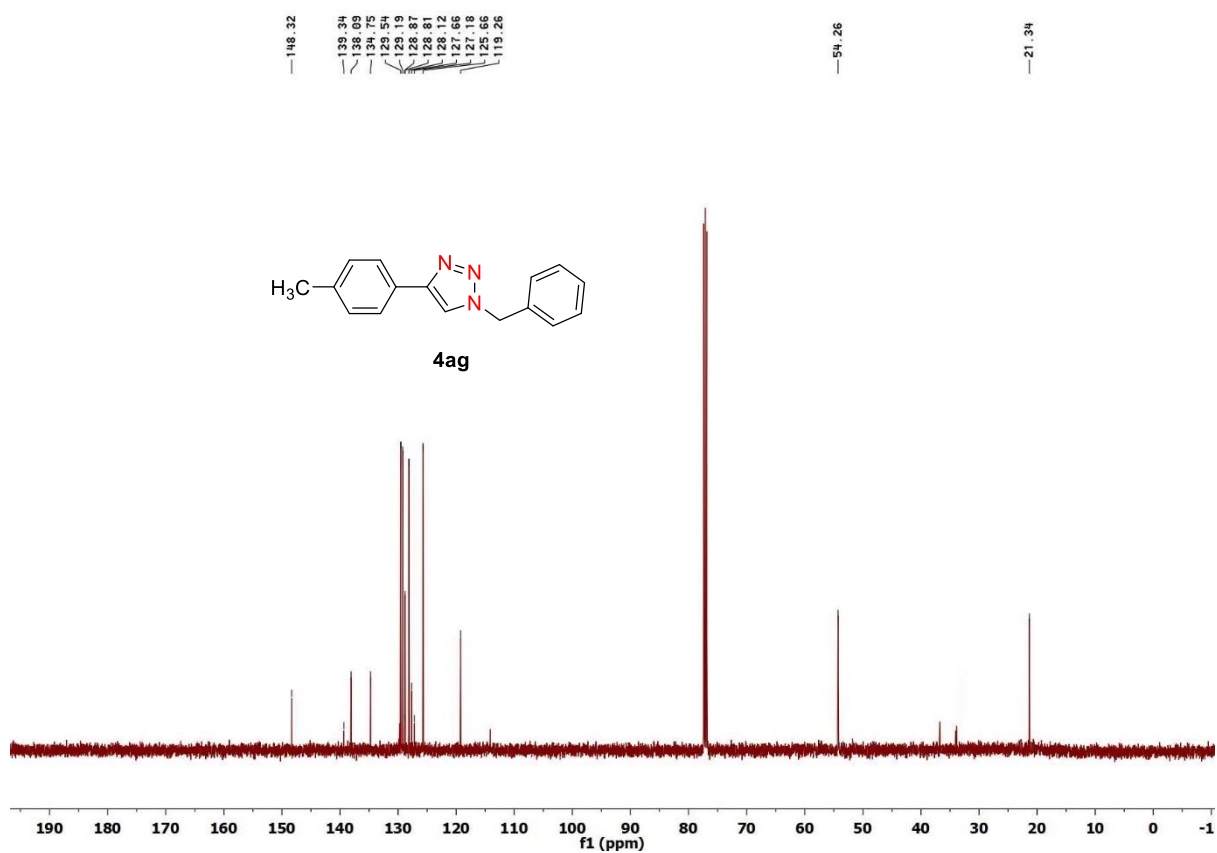

**Fig. S37:**  $^{13}\text{C}$  NMR (125 MHz,  $\text{CDCl}_3$ ) of the compound **4ag**.

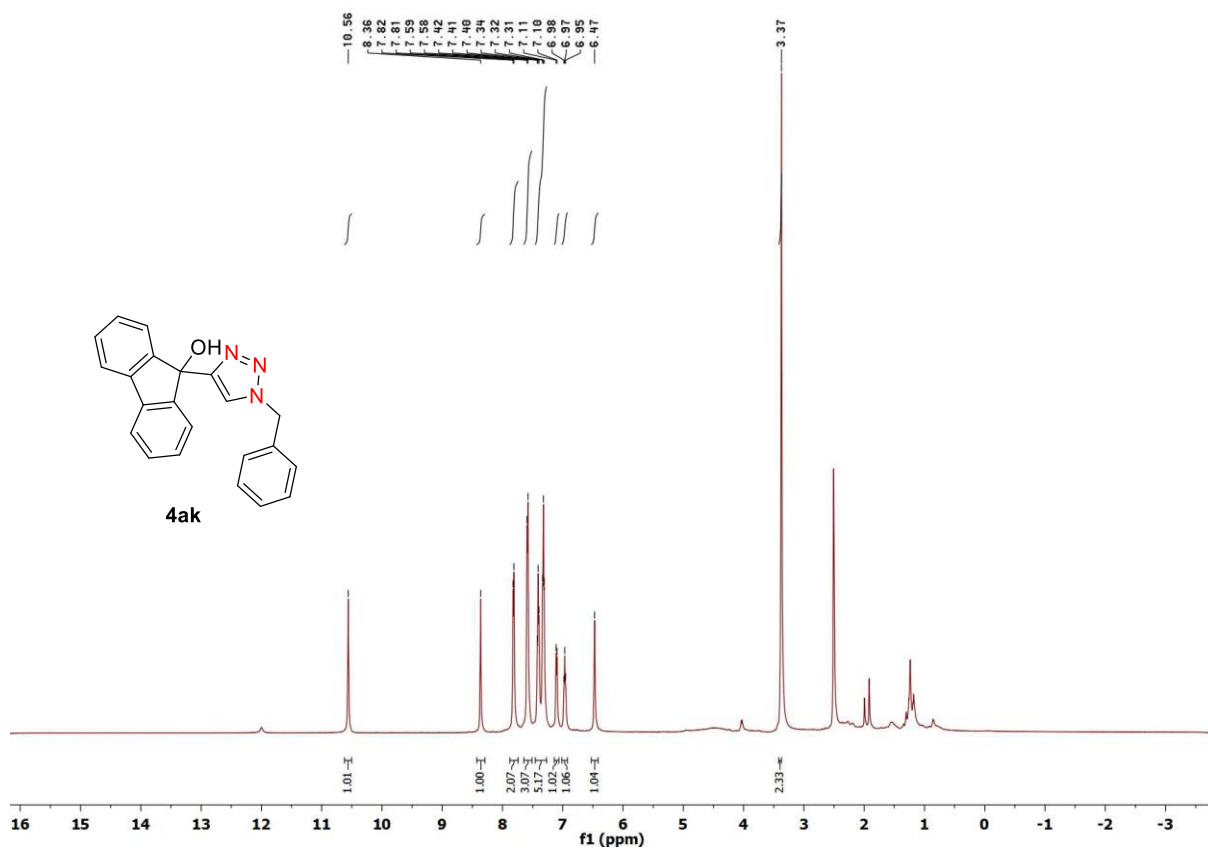

**Fig. S38:** <sup>1</sup>H NMR (500 MHz, DMSO-*d*<sub>6</sub>) of the compound **4ak**.



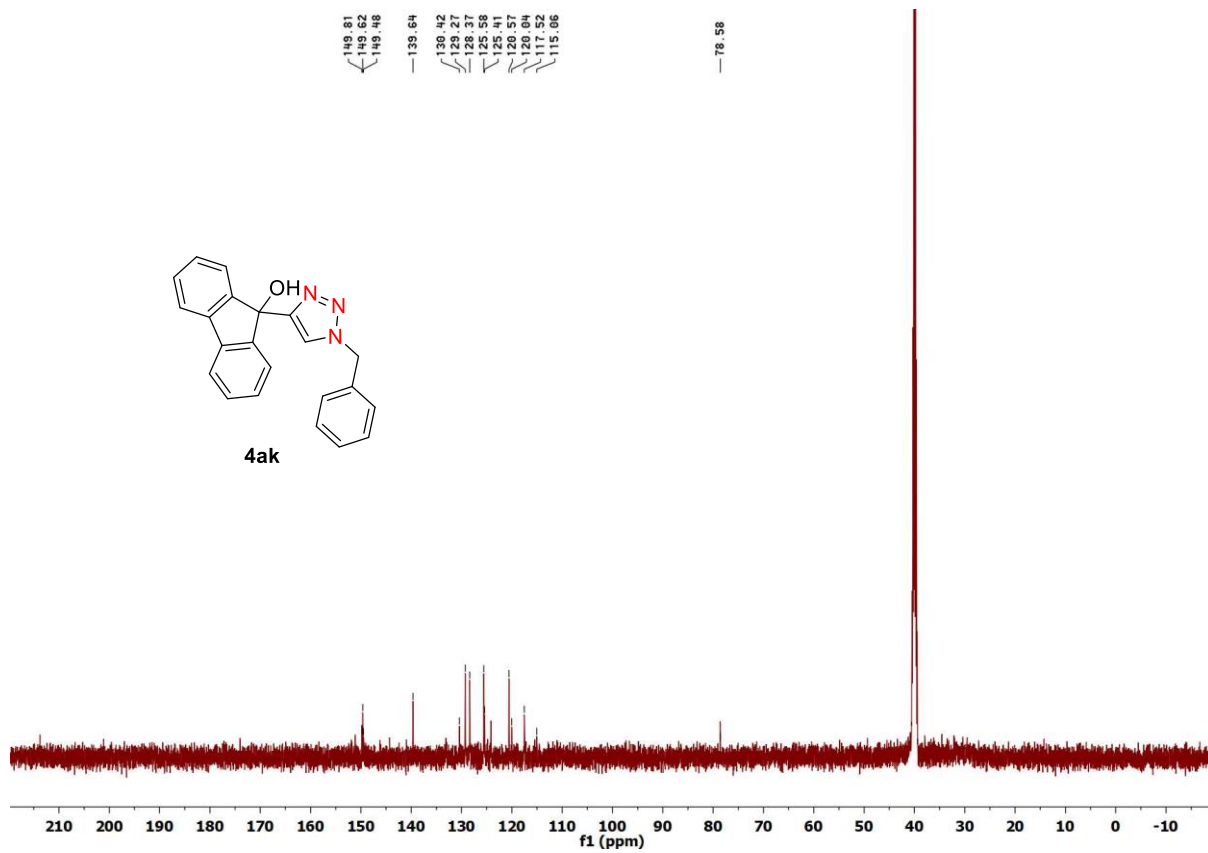

Fig. S39:  $^{13}\text{C}$  NMR (125 MHz,  $\text{DMSO-}d_6$ ) of the compound 4ak.

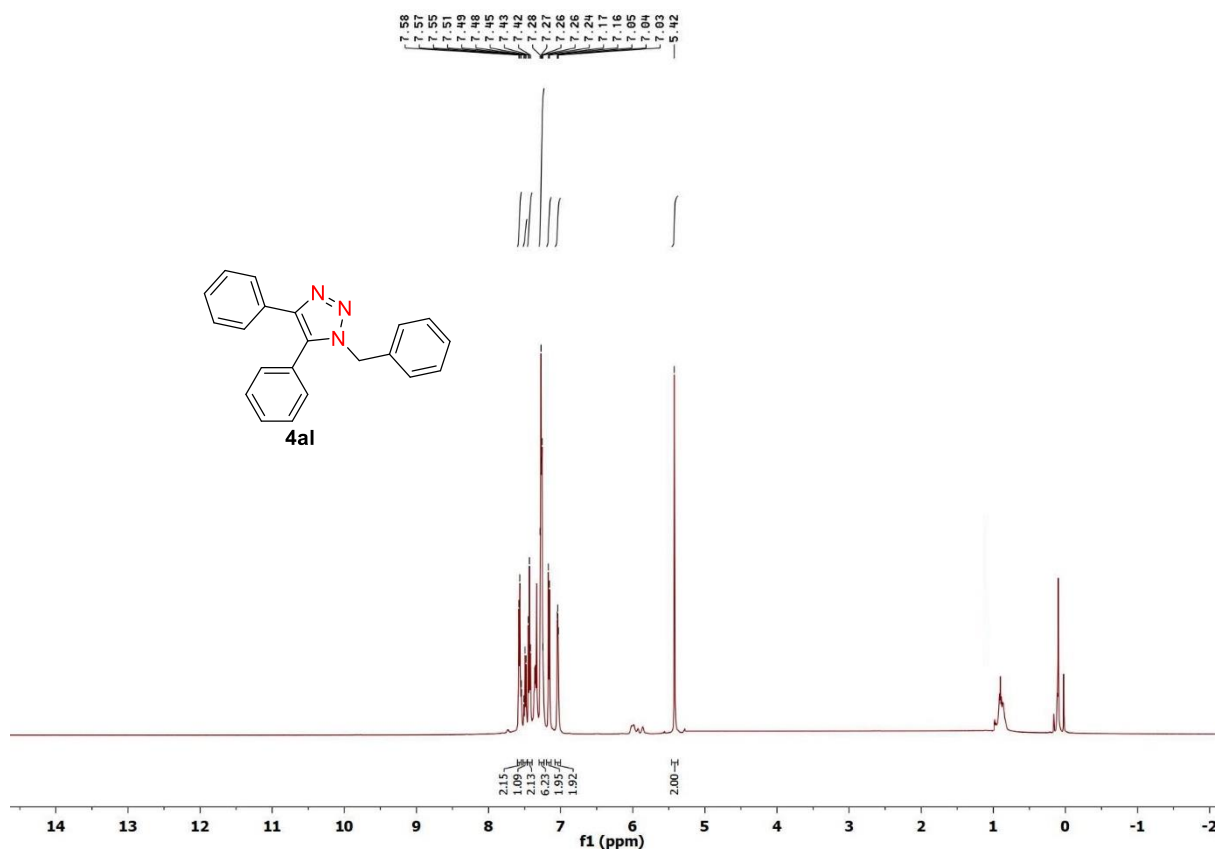

Fig. S40: <sup>1</sup>H NMR (500 MHz, CDCl<sub>3</sub>) of the compound 4al.

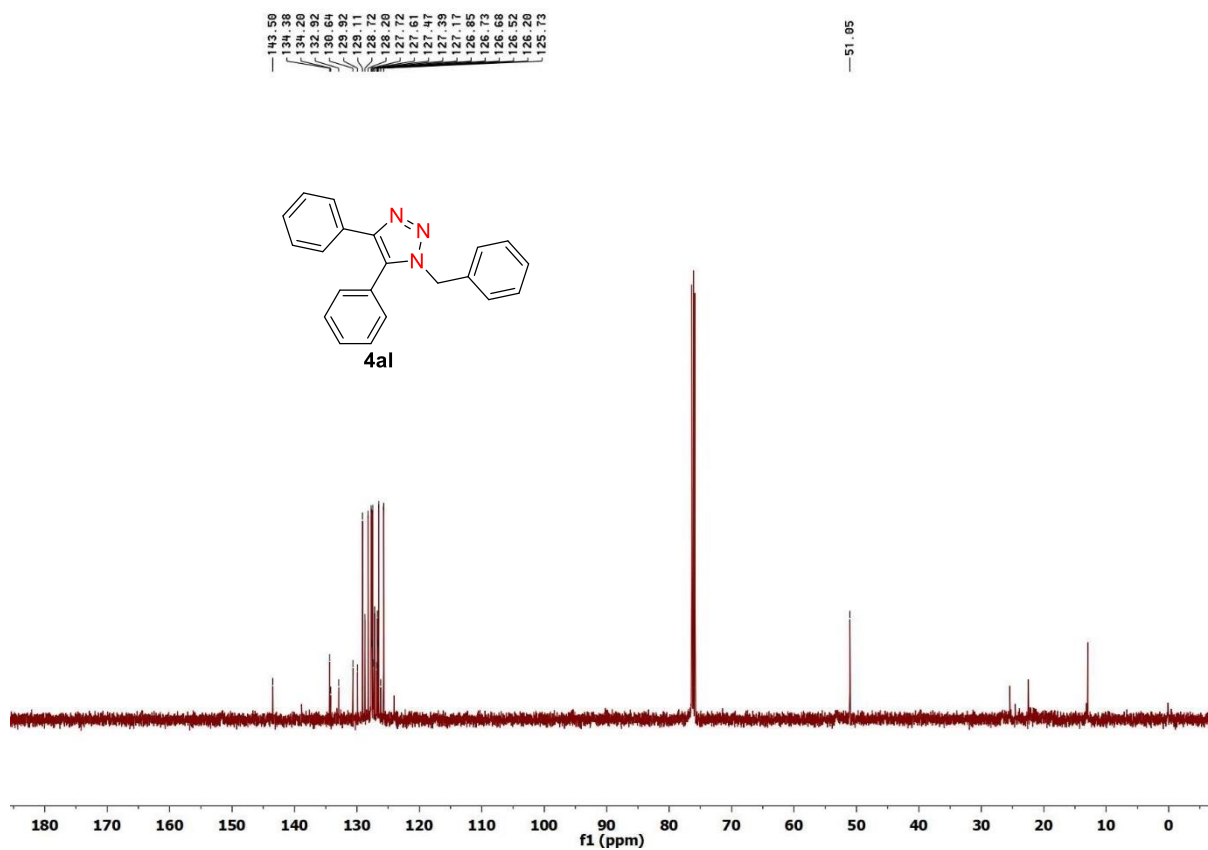

**Fig. S41:**  $^{13}\text{C}$  NMR (125 MHz,  $\text{CDCl}_3$ ) of the compound **4al**.

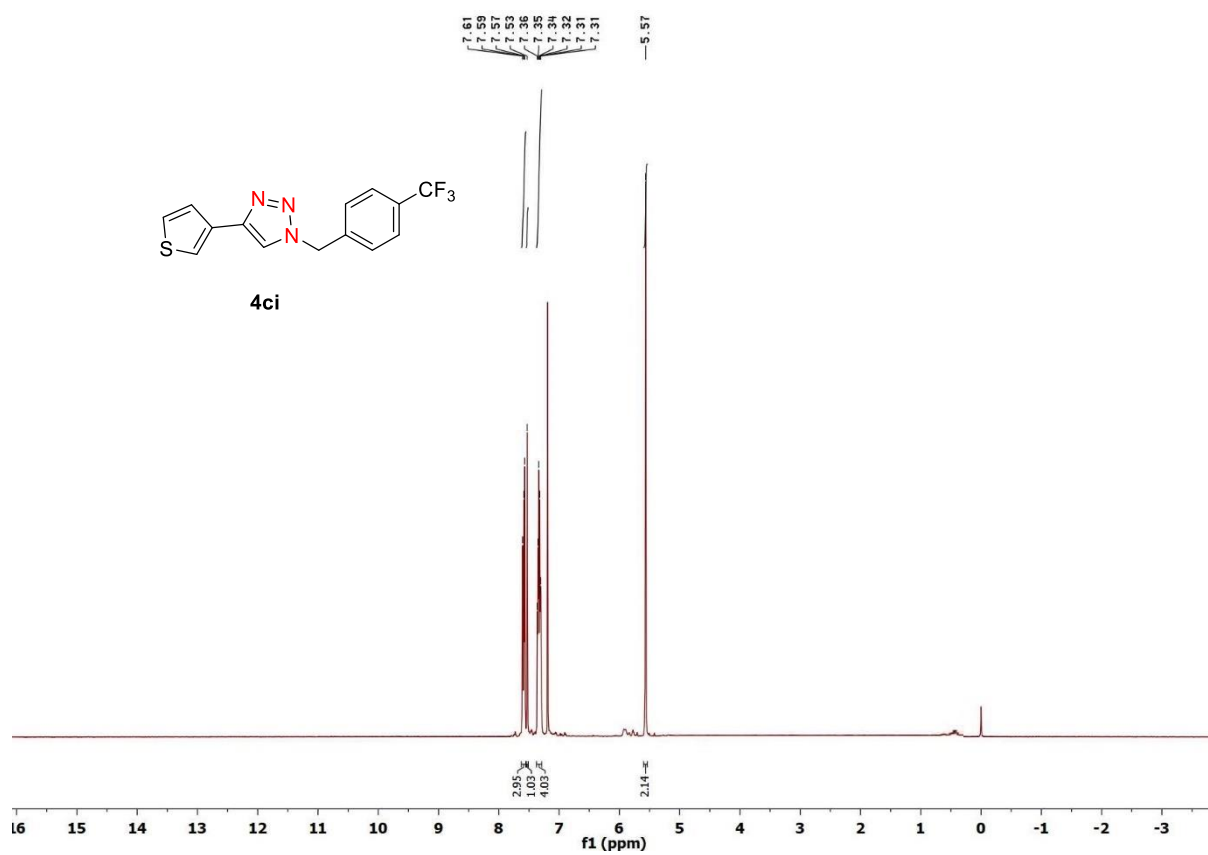

Fig. S42: <sup>1</sup>H NMR (500 MHz, CDCl<sub>3</sub>) of the compound **4ci**.

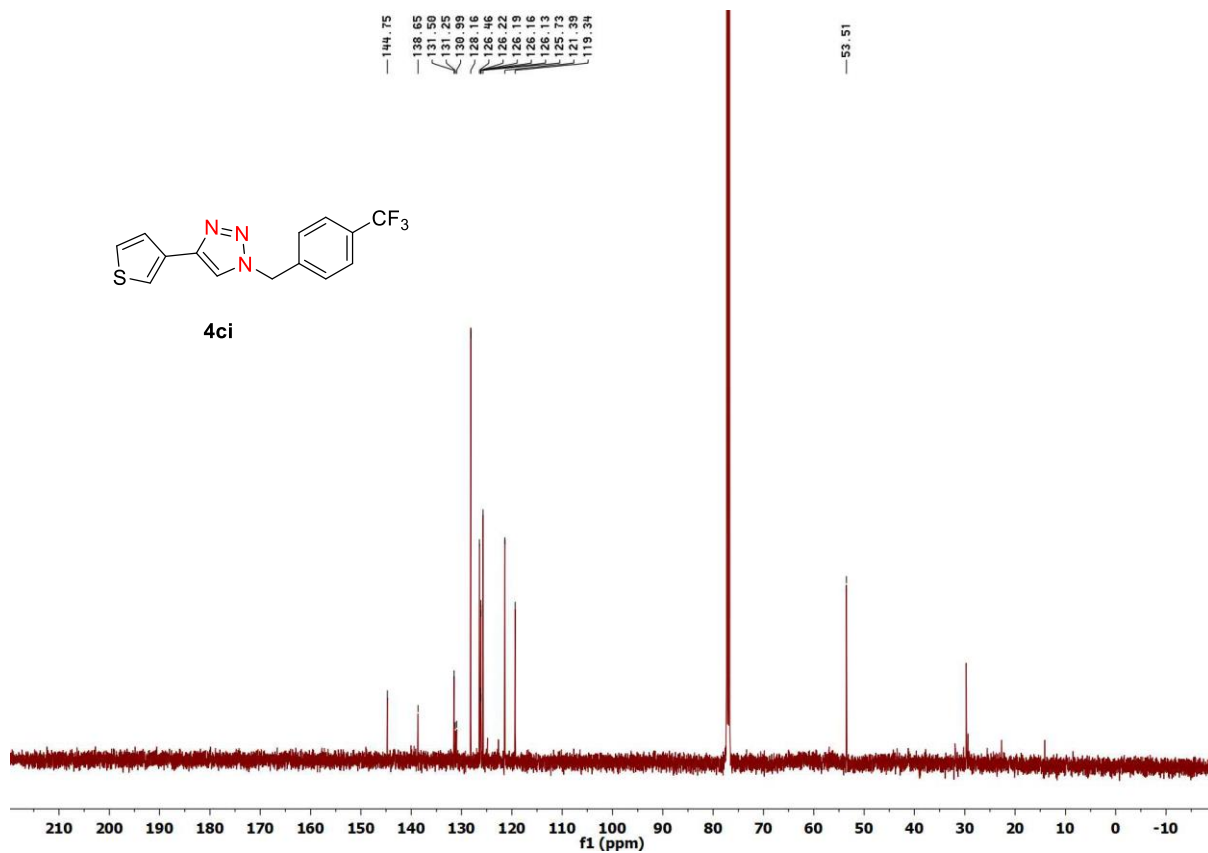

Fig. S43:  $^{13}\text{C}$  NMR (125 MHz,  $\text{CDCl}_3$ ) of the compound **4ci**.

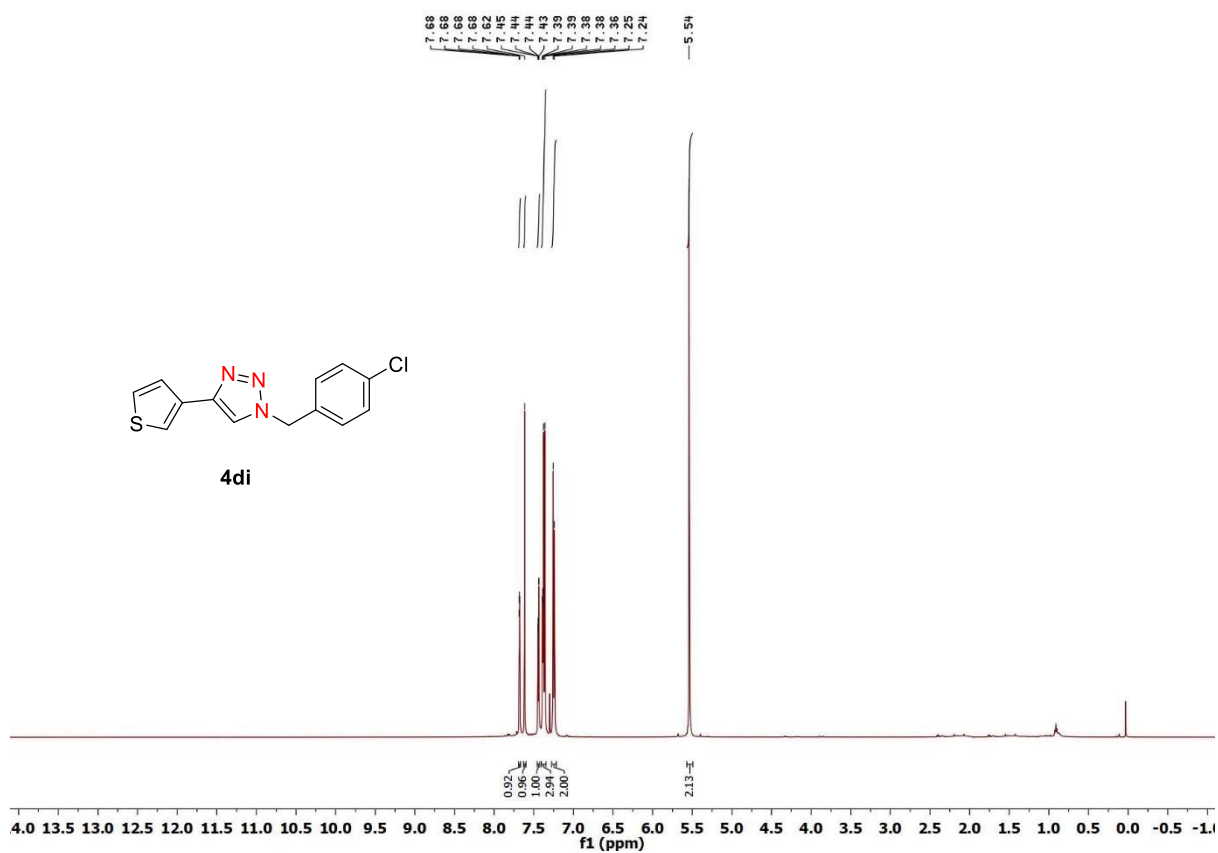

**Fig. S44:** <sup>1</sup>H NMR (500 MHz, CDCl<sub>3</sub>) of the compound **4di**.

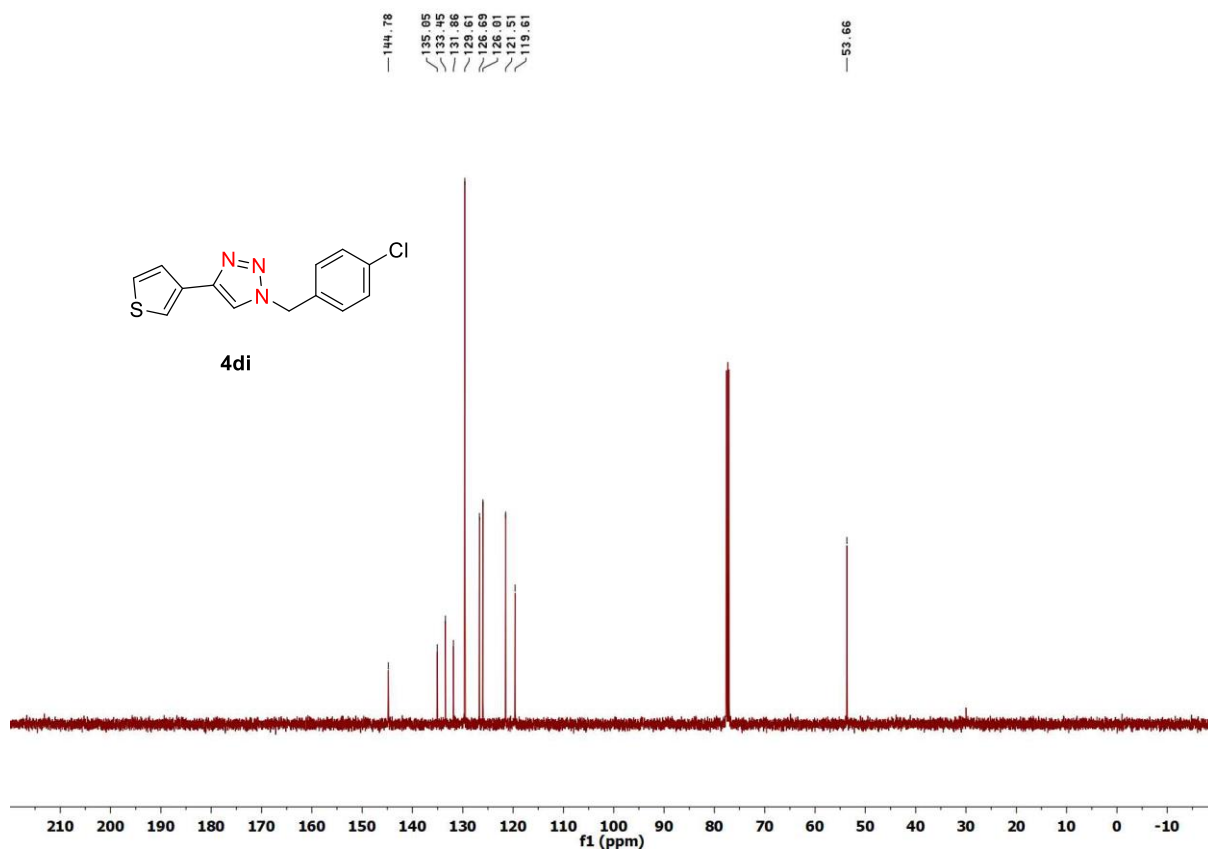

**Fig. S45:**  $^{13}\text{C}$  NMR (125 MHz,  $\text{CDCl}_3$ ) of the compound **4di**.

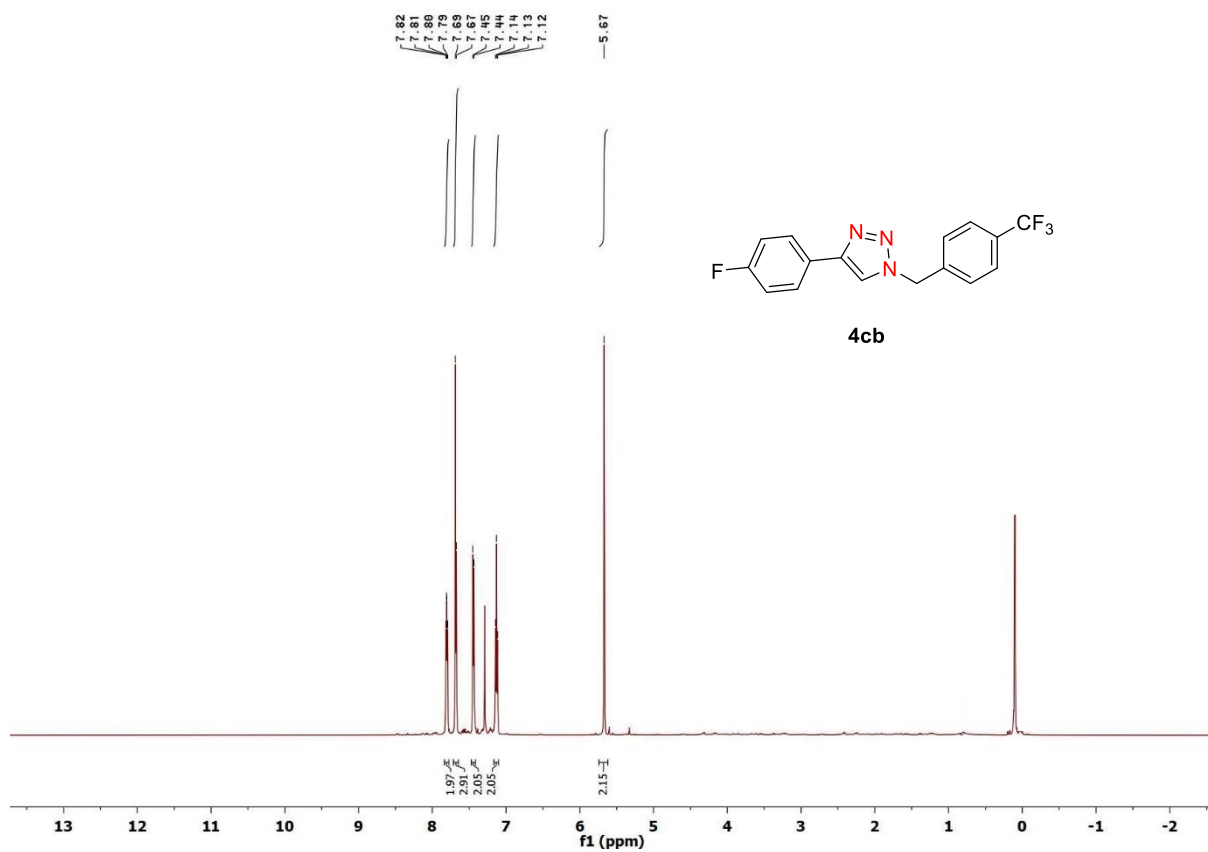

**Fig. S46:**  $^1\text{H}$  NMR (500 MHz,  $\text{CDCl}_3$ ) of the compound **4cb**.



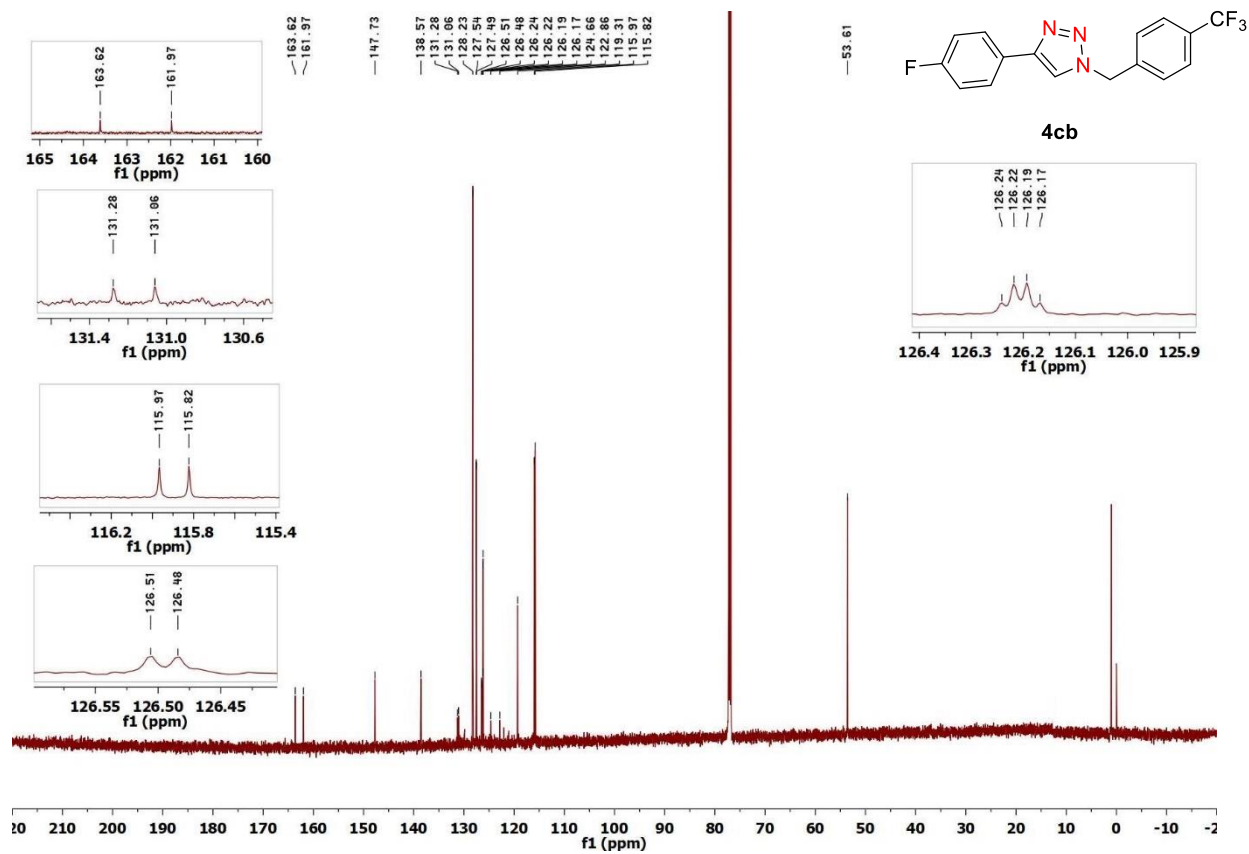

Fig. S47:  $^{13}\text{C}$  NMR (125 MHz,  $\text{CDCl}_3$ ) of the compound **4cb**.

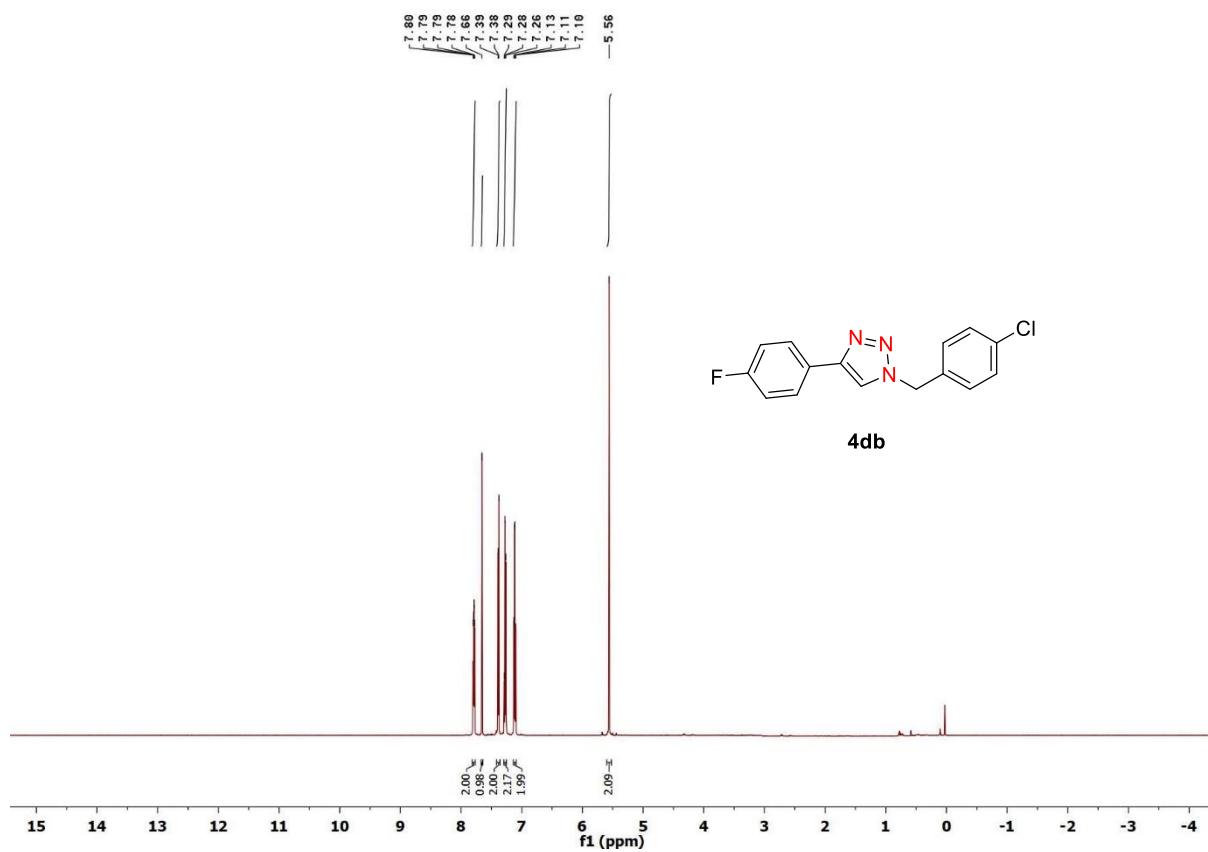

**Fig. S48:** <sup>1</sup>H NMR (500 MHz, CDCl<sub>3</sub>) of the compound **4db**.

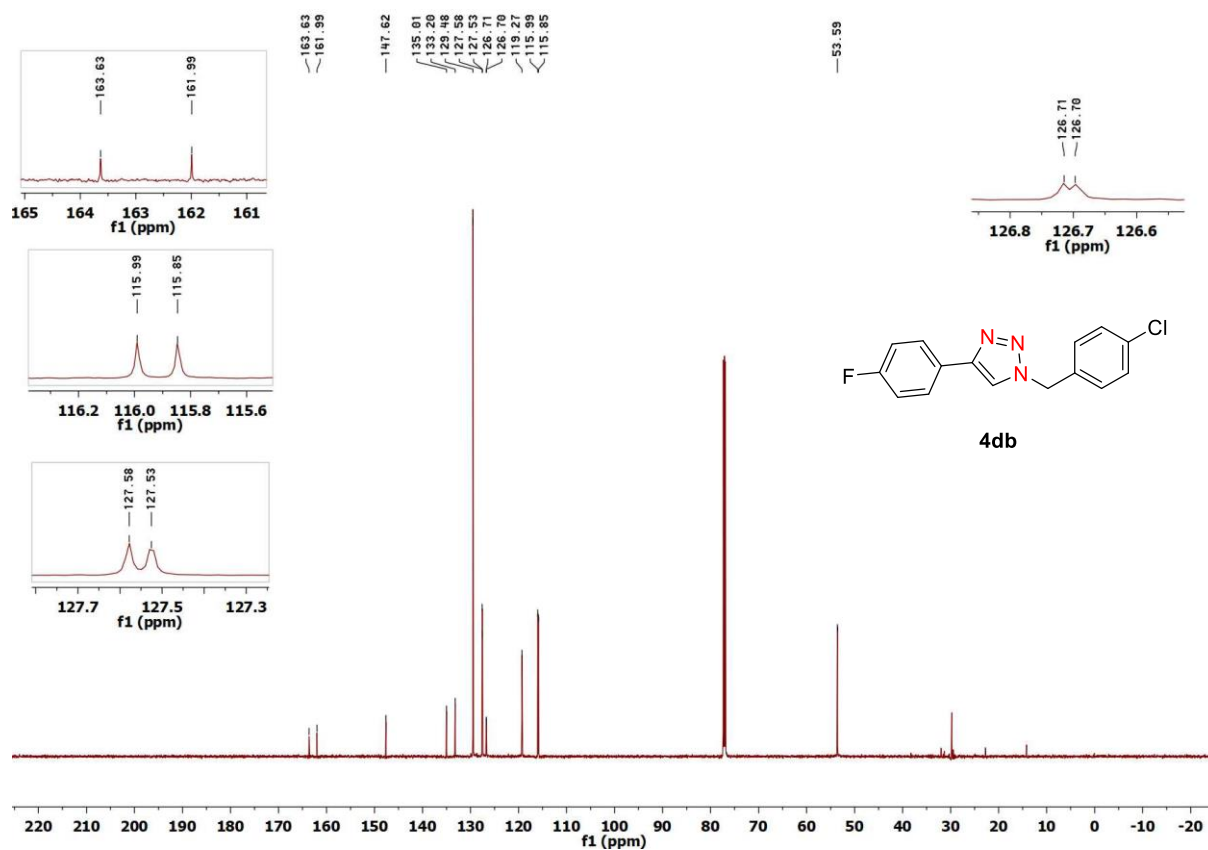

**Fig. S49:**  $^{13}\text{C}$  NMR (125 MHz,  $\text{CDCl}_3$ ) of the compound **4db**.

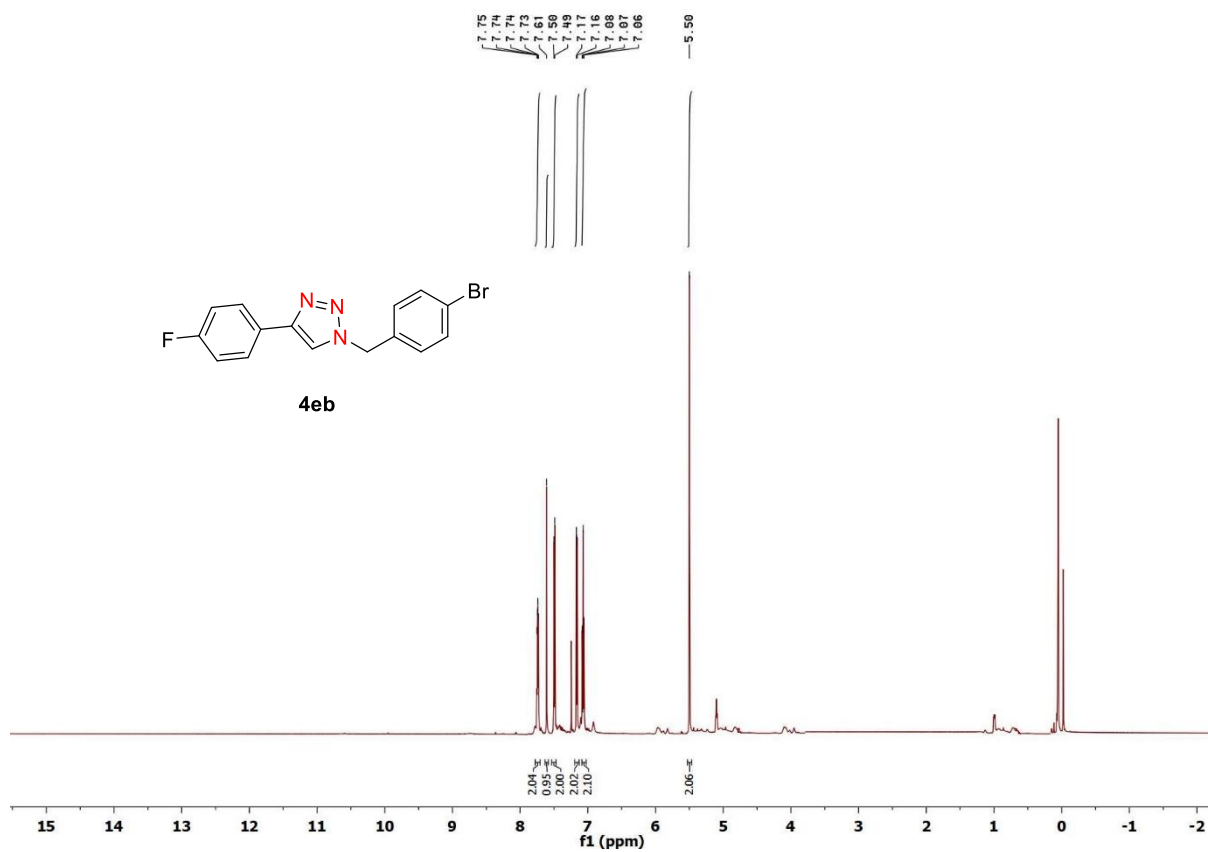

**Fig. S50:** <sup>1</sup>H NMR (500 MHz, CDCl<sub>3</sub>) of the compound **4eb**.

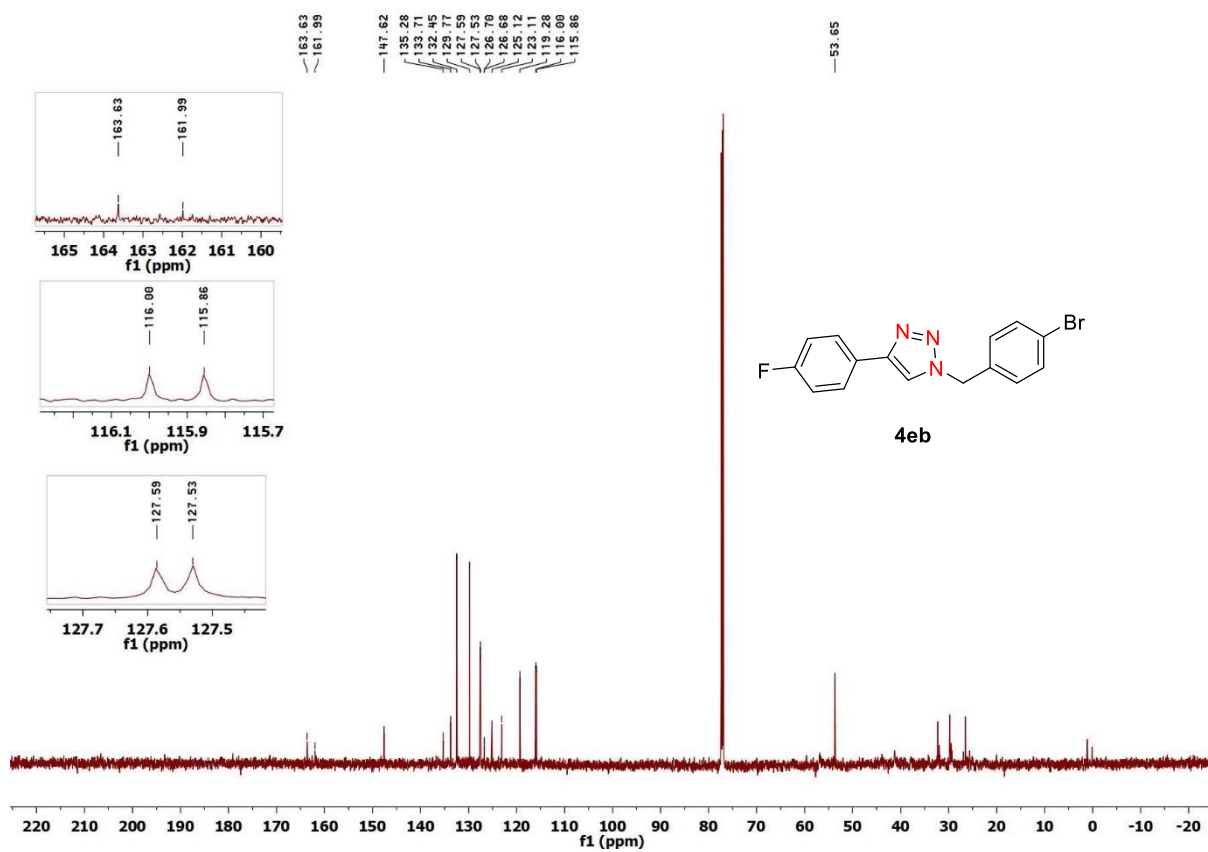

**Fig. S51:** <sup>13</sup>C NMR (125 MHz, CDCl<sub>3</sub>) of the compound **4eb**.

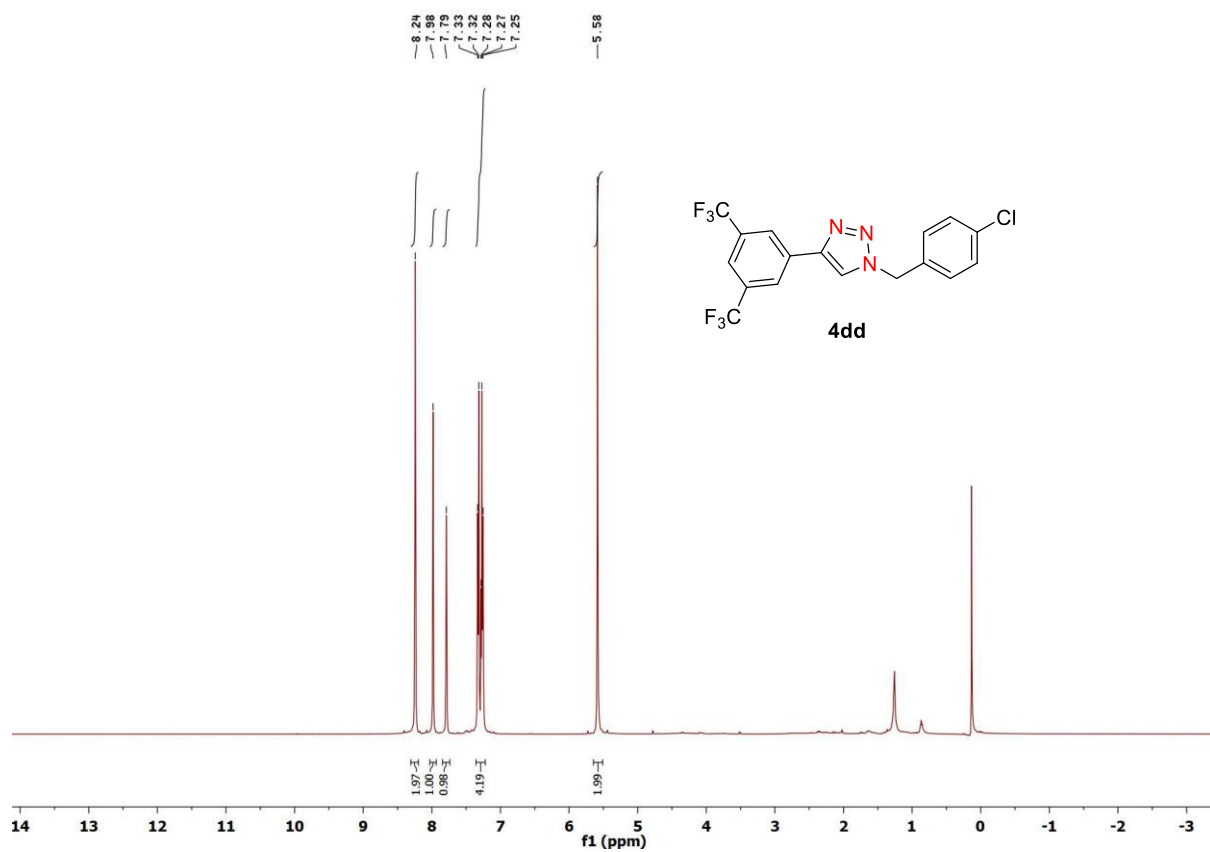

**Fig. S52:** <sup>1</sup>H NMR (500 MHz, CDCl<sub>3</sub>) of the compound **4dd**.

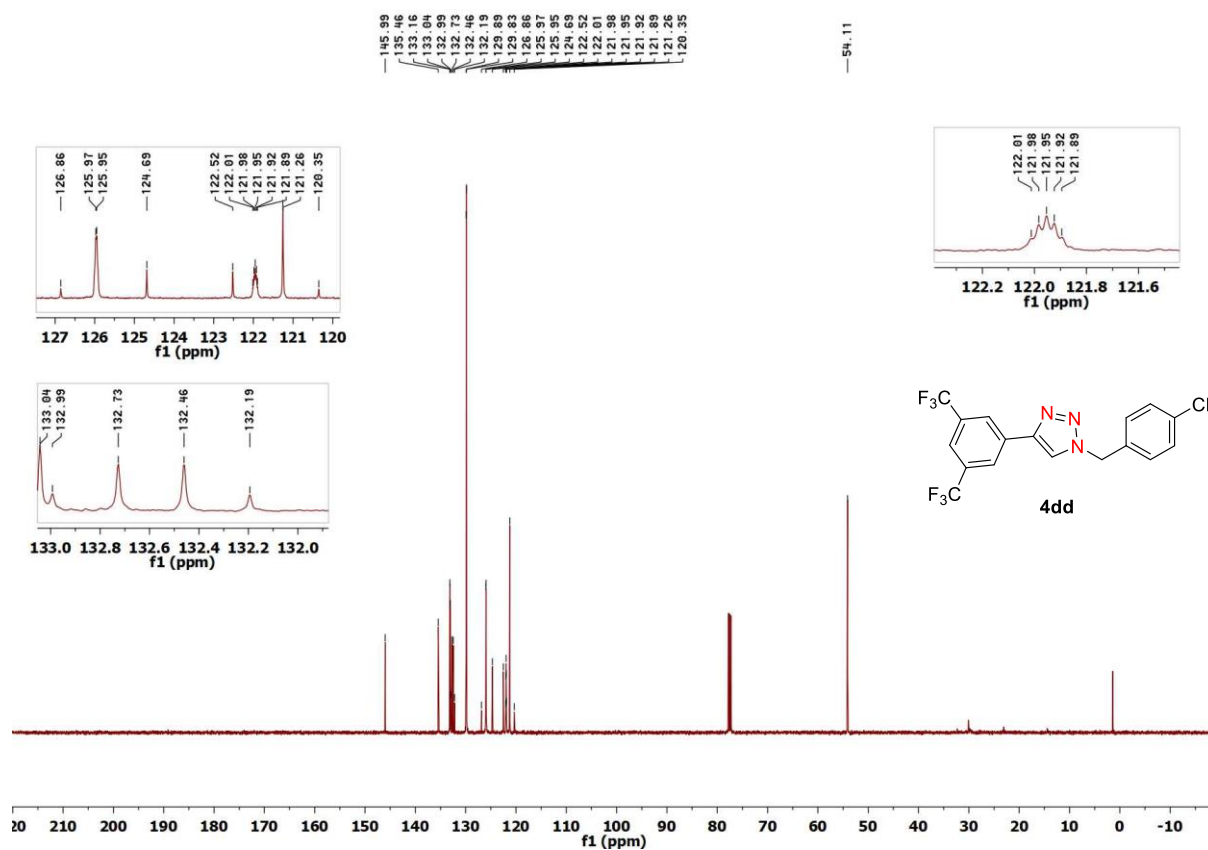

**Fig. S53:** <sup>13</sup>C NMR (125 MHz, CDCl<sub>3</sub>) of the compound **4dd**.

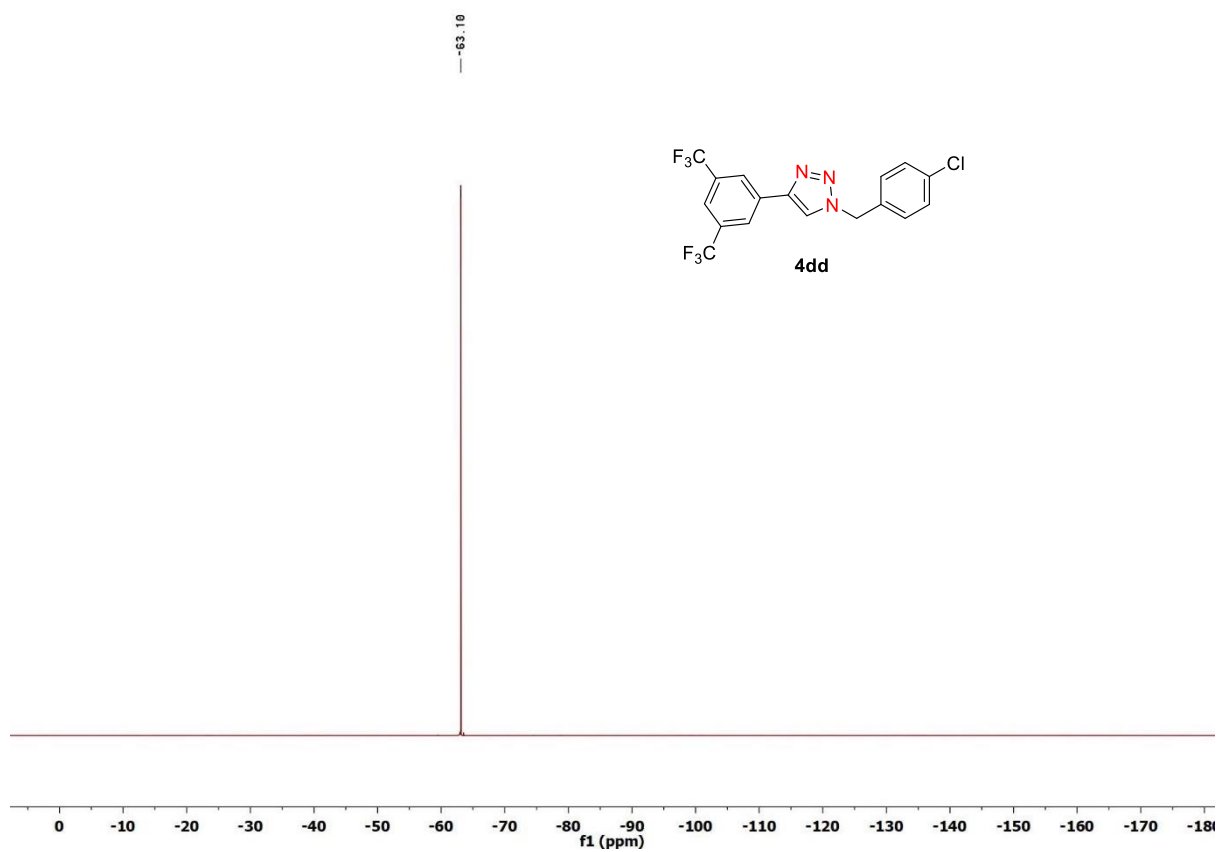

**Fig. S54:**  $^{19}\text{F}$  NMR (470 MHz,  $\text{CDCl}_3$ ) of the compound **4dd**.



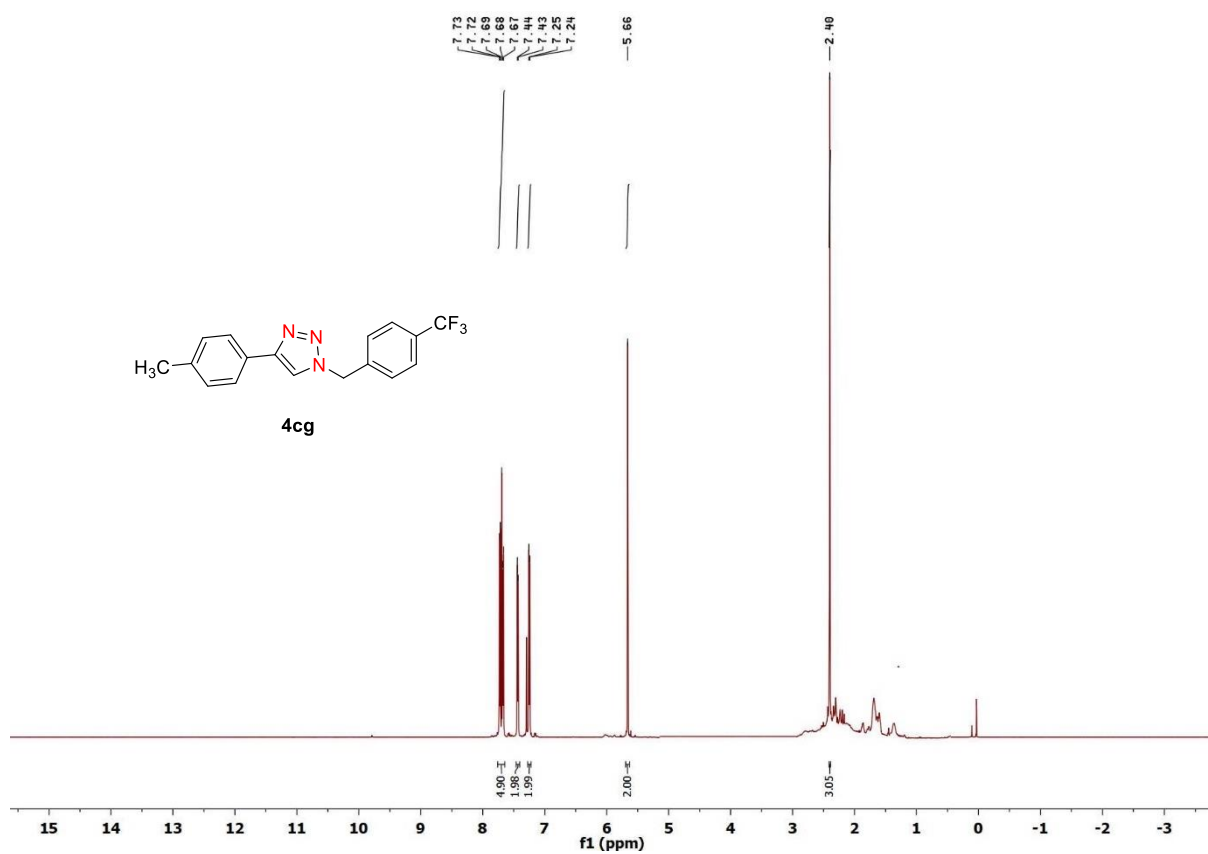

Fig. S55: <sup>1</sup>H NMR (500 MHz, CDCl<sub>3</sub>) of the compound **4cg**.

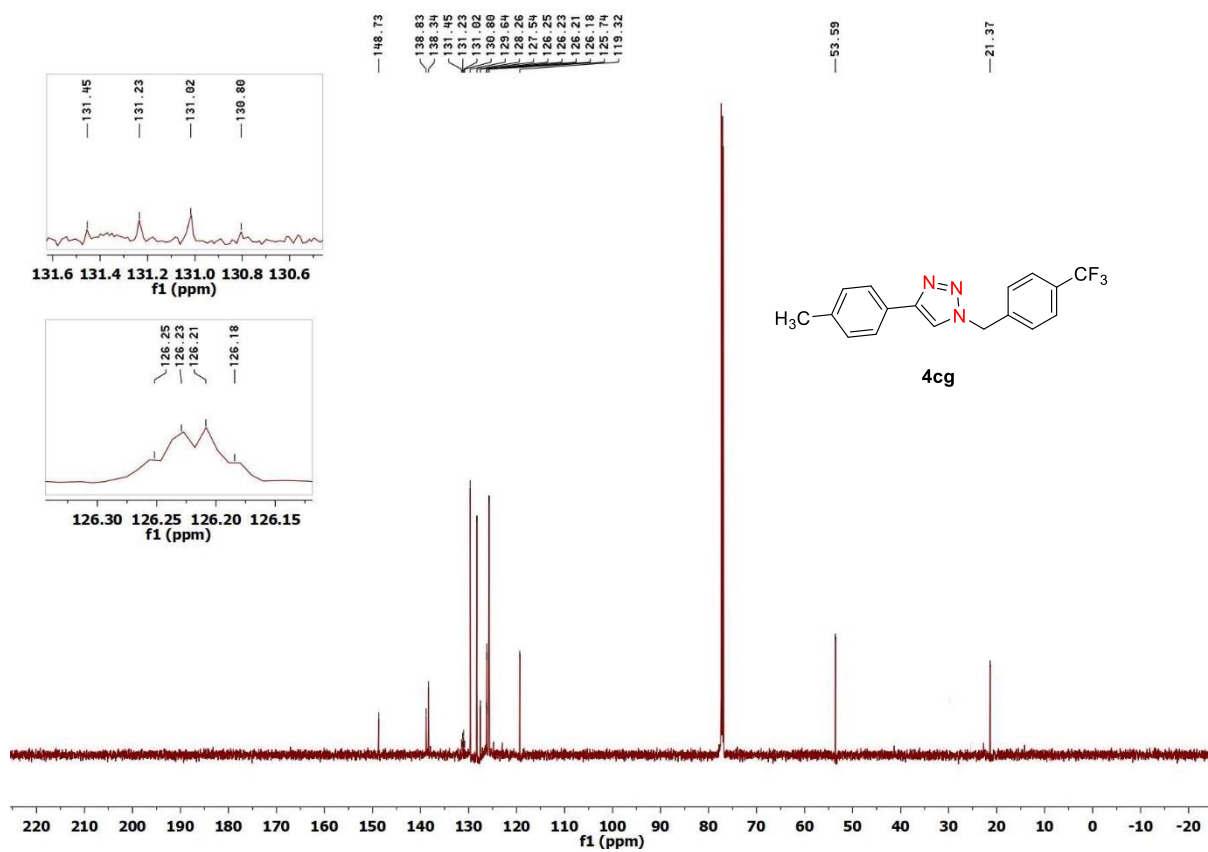

**Fig. S56:** <sup>13</sup>C NMR (125 MHz, CDCl<sub>3</sub>) of the compound **4cg**.

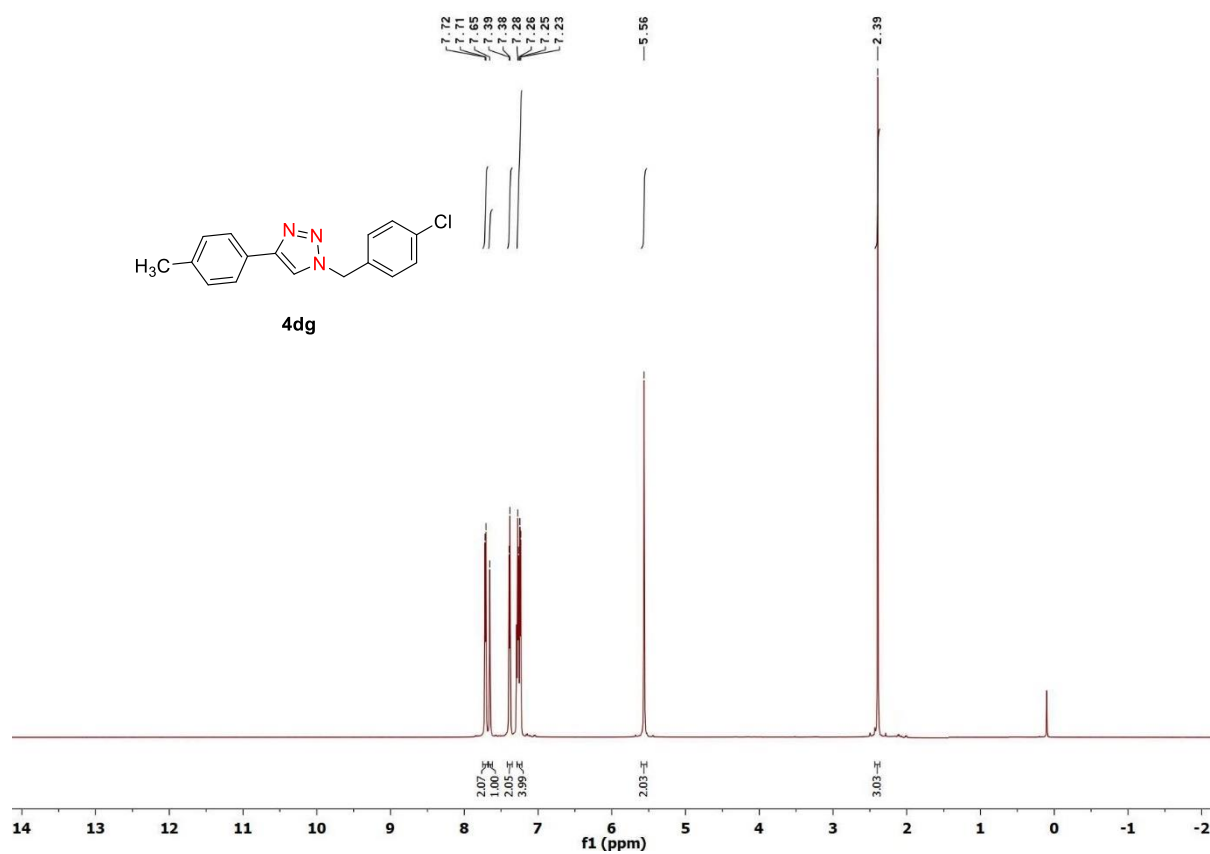

**Fig. S57:**  $^1\text{H}$  NMR (500 MHz,  $\text{CDCl}_3$ ) of the compound **4dg**.

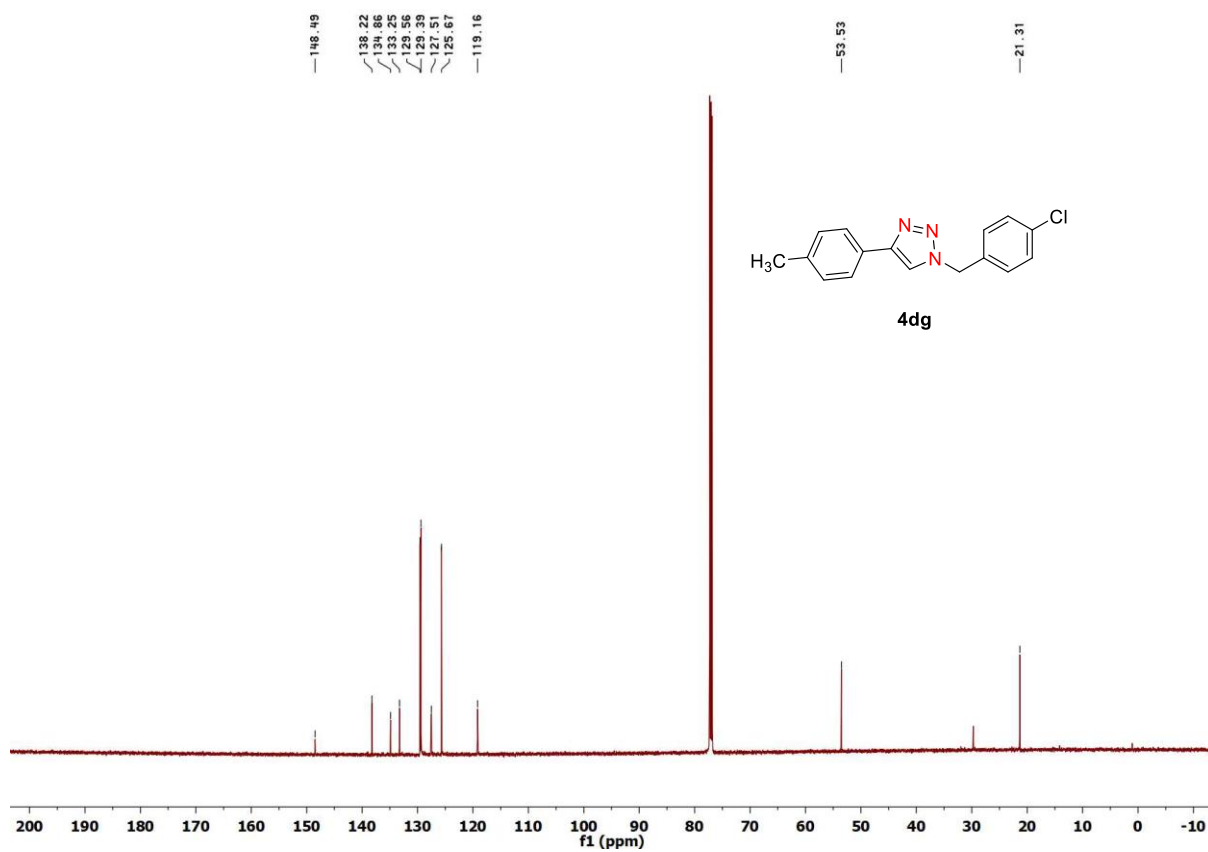

**Fig. S58:**  $^{13}\text{C}$  NMR (125 MHz,  $\text{CDCl}_3$ ) of the compound **4dg**.

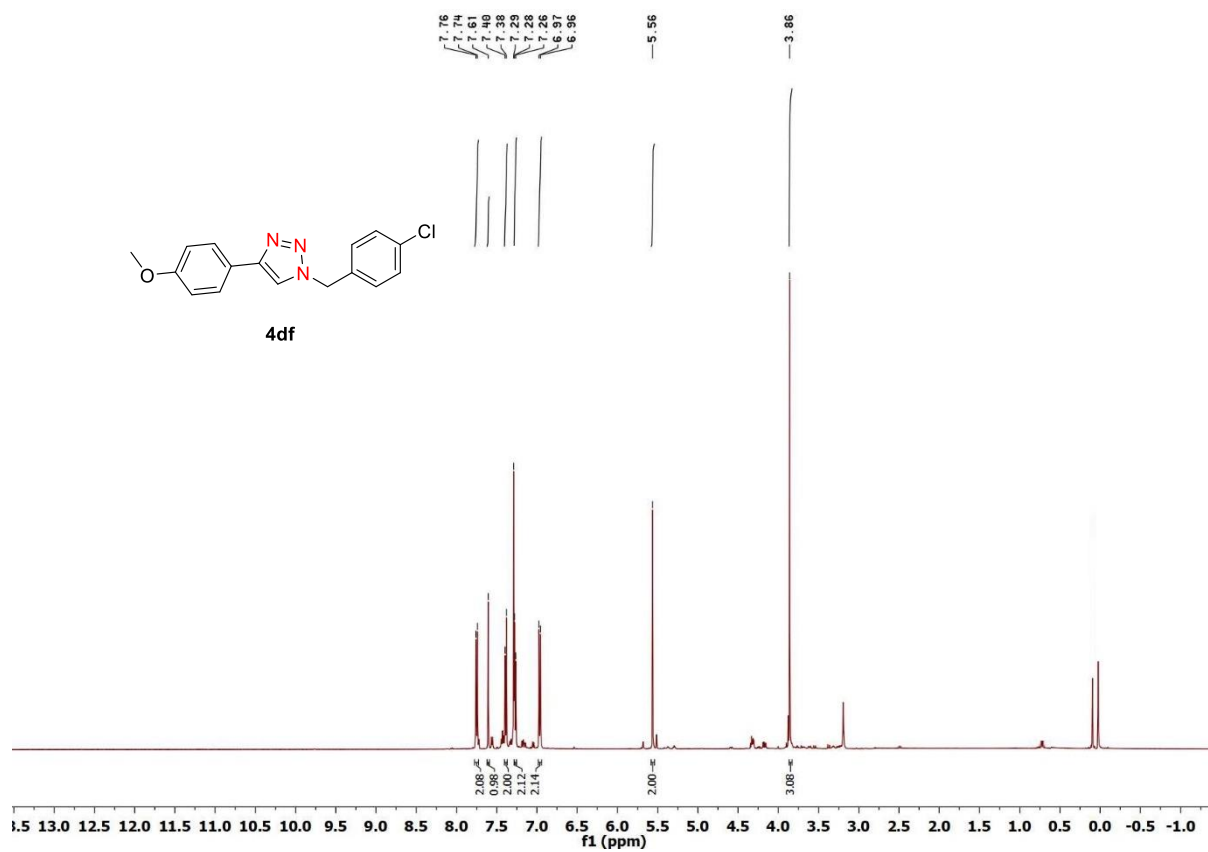

**Fig. S59:**  $^1\text{H NMR}$  (500 MHz,  $\text{CDCl}_3$ ) of the compound **4df**.

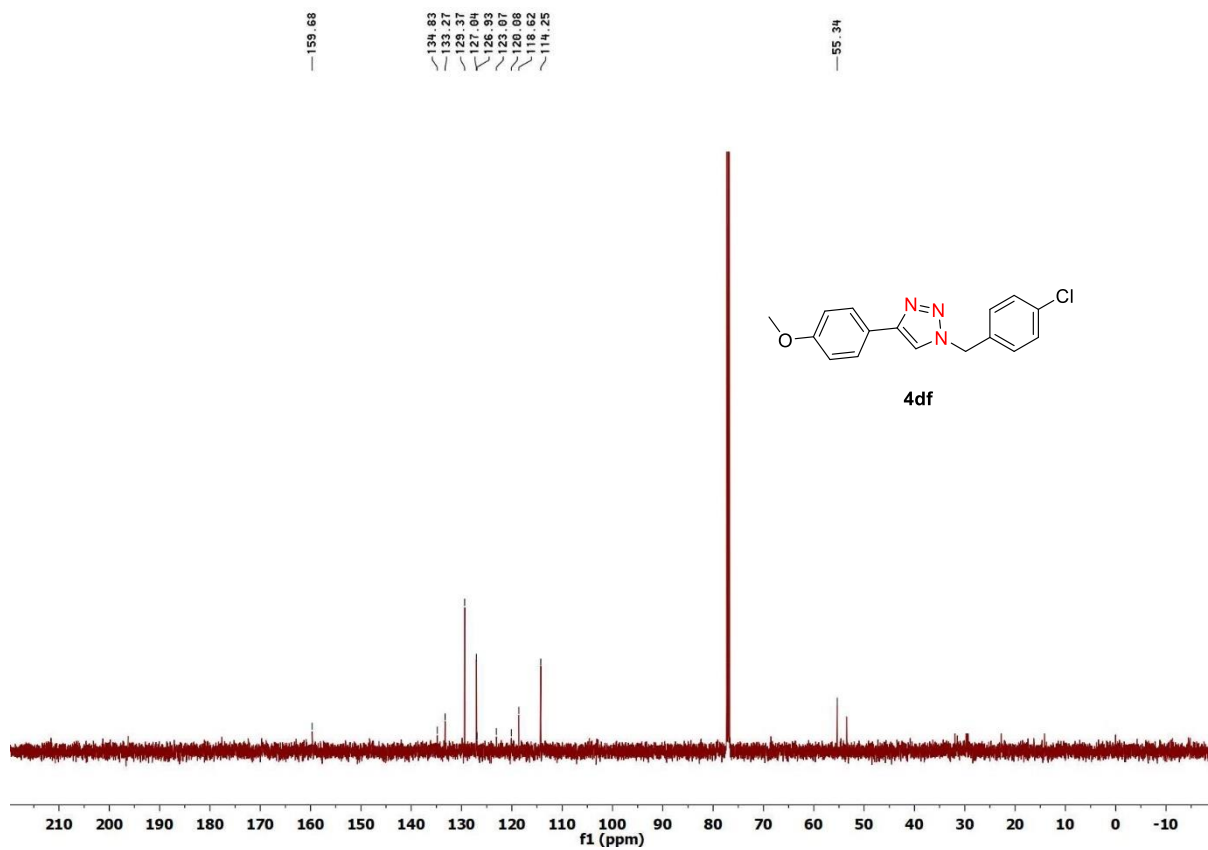

**Fig. S60:**  $^{13}\text{C}$  NMR (125 MHz,  $\text{CDCl}_3$ ) of the compound **4df**.

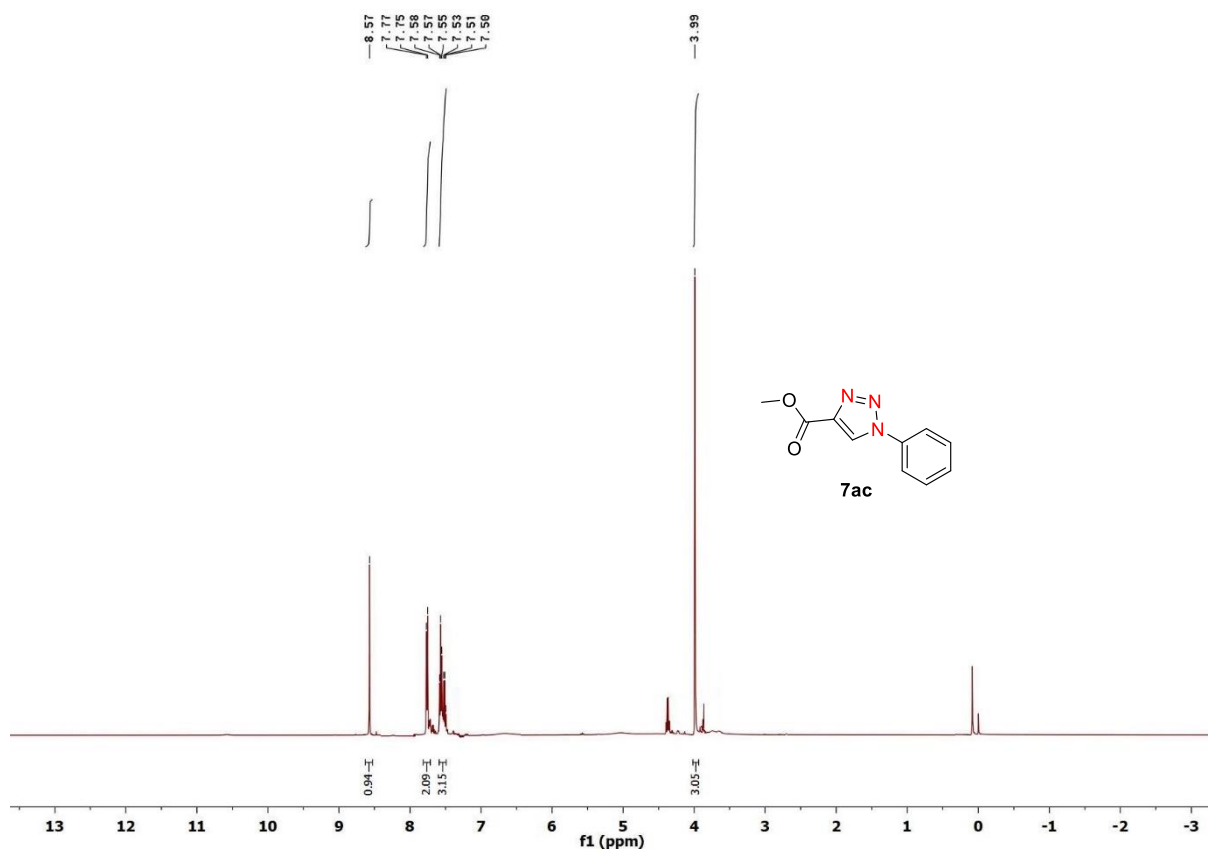

**Fig. S61:**  $^1\text{H}$  NMR (500 MHz,  $\text{CDCl}_3$ ) of the compound **7ac**.

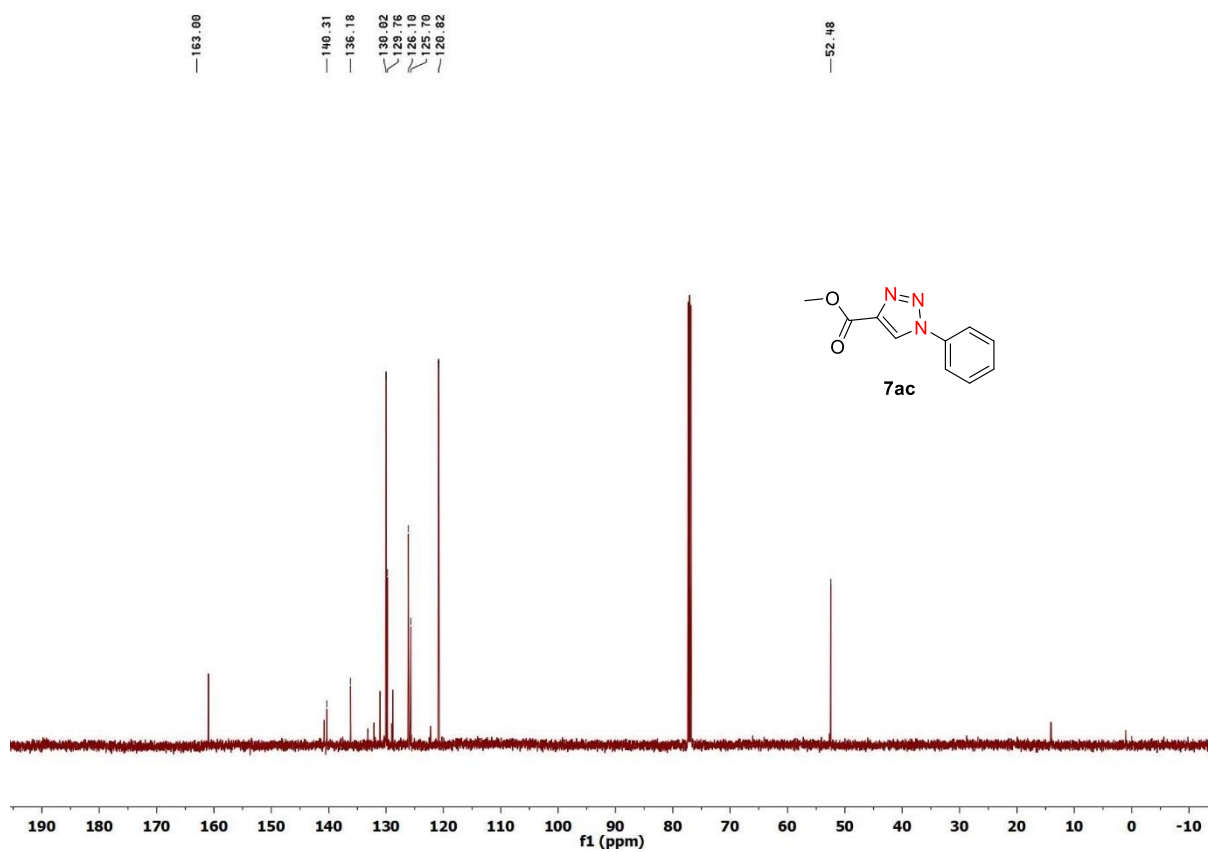

**Fig. S62:**  $^{13}\text{C}$  NMR (125 MHz,  $\text{CDCl}_3$ ) of the compound **7ac**.



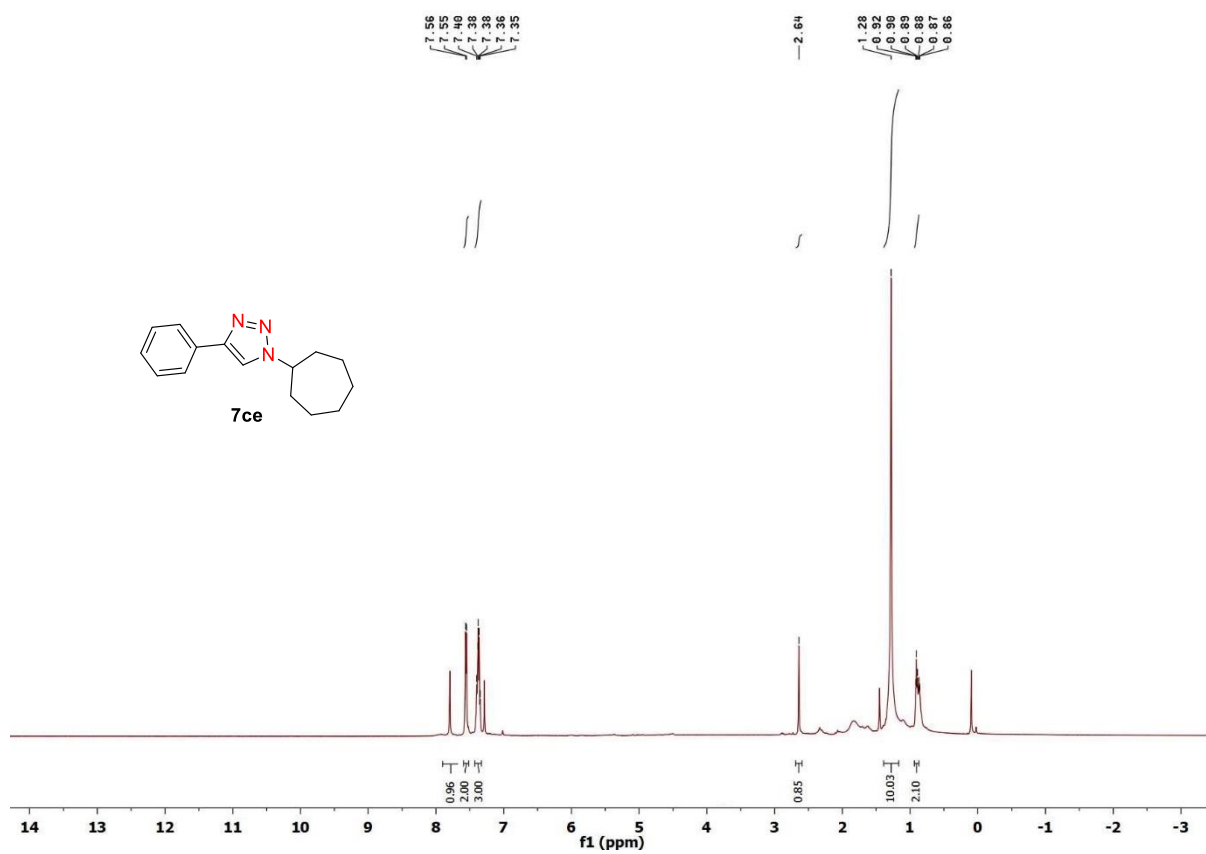

**Fig. S63:** <sup>1</sup>H NMR (500 MHz, CDCl<sub>3</sub>) of the compound **7ce**.

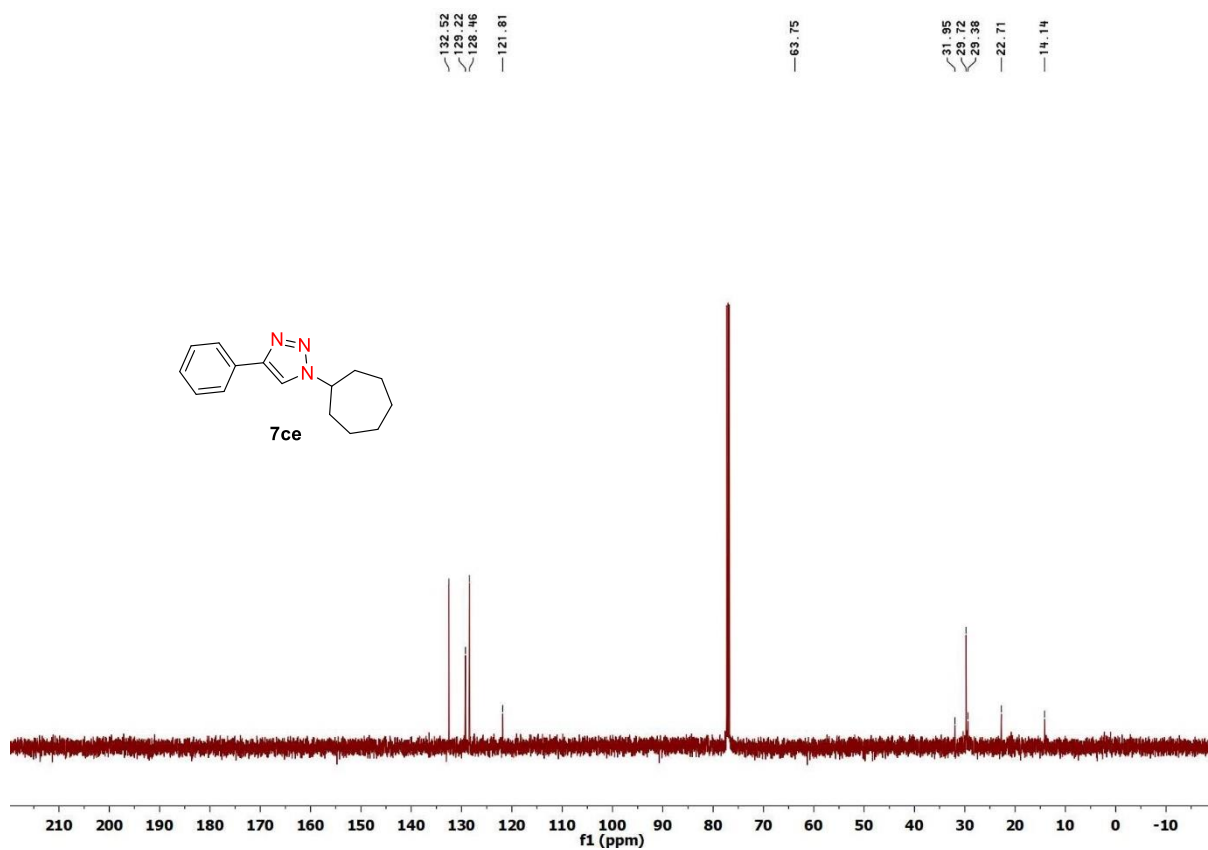

**Fig. S64:**  $^{13}\text{C}$  NMR (125 MHz,  $\text{CDCl}_3$ ) of the compound 7ce.

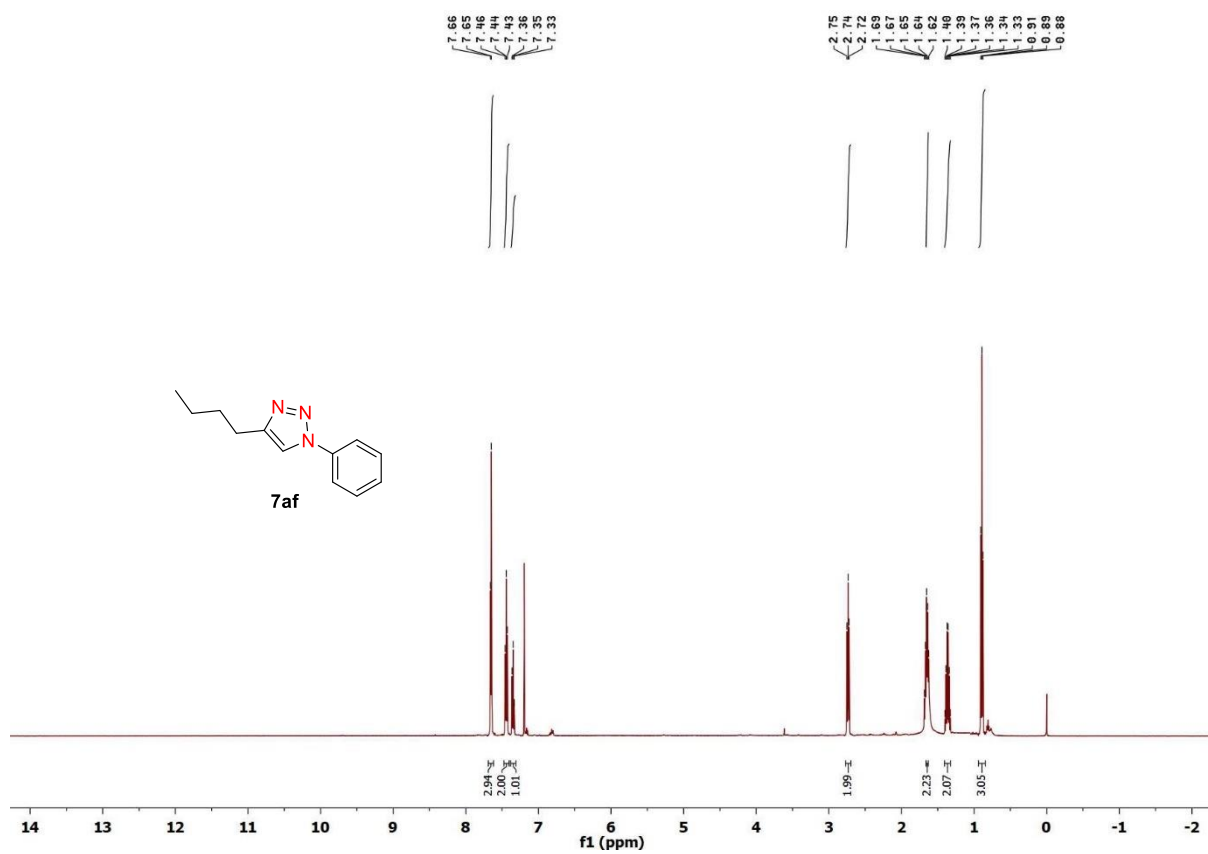

**Fig. S65:** <sup>1</sup>H NMR (500 MHz, CDCl<sub>3</sub>) of the compound **7af**.

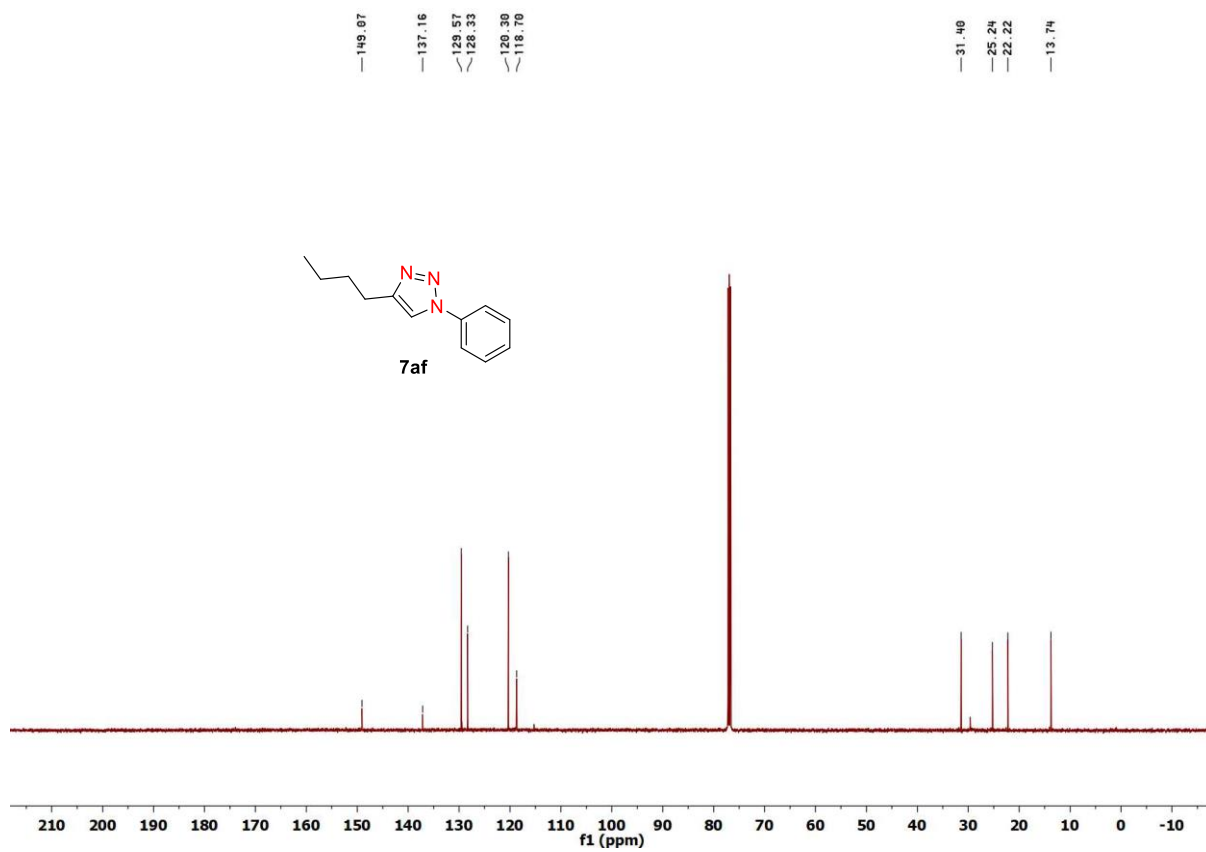

**Fig. S66:**  $^{13}\text{C}$  NMR (125 MHz,  $\text{CDCl}_3$ ) of the compound **7af**.

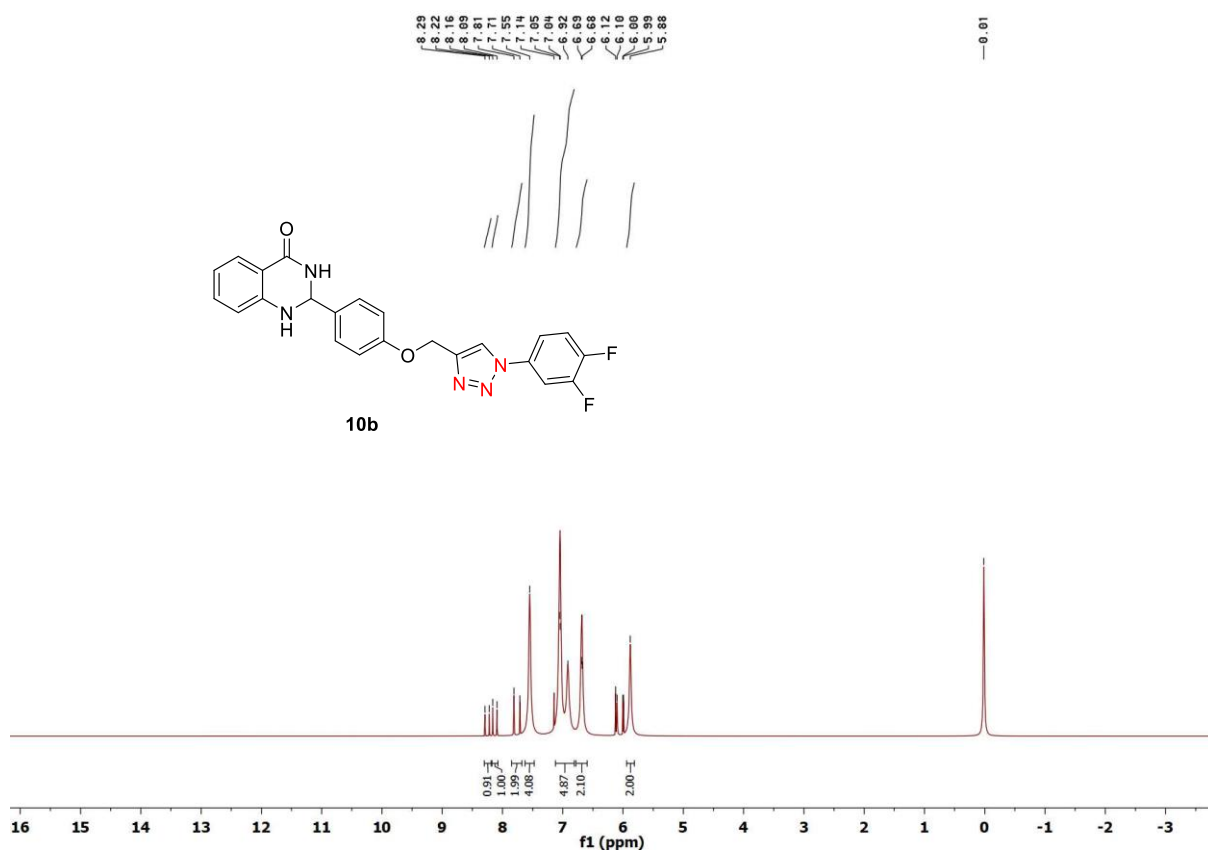

**Fig. S67:** <sup>1</sup>H NMR (500 MHz, CDCl<sub>3</sub>) of the compound **10b**.

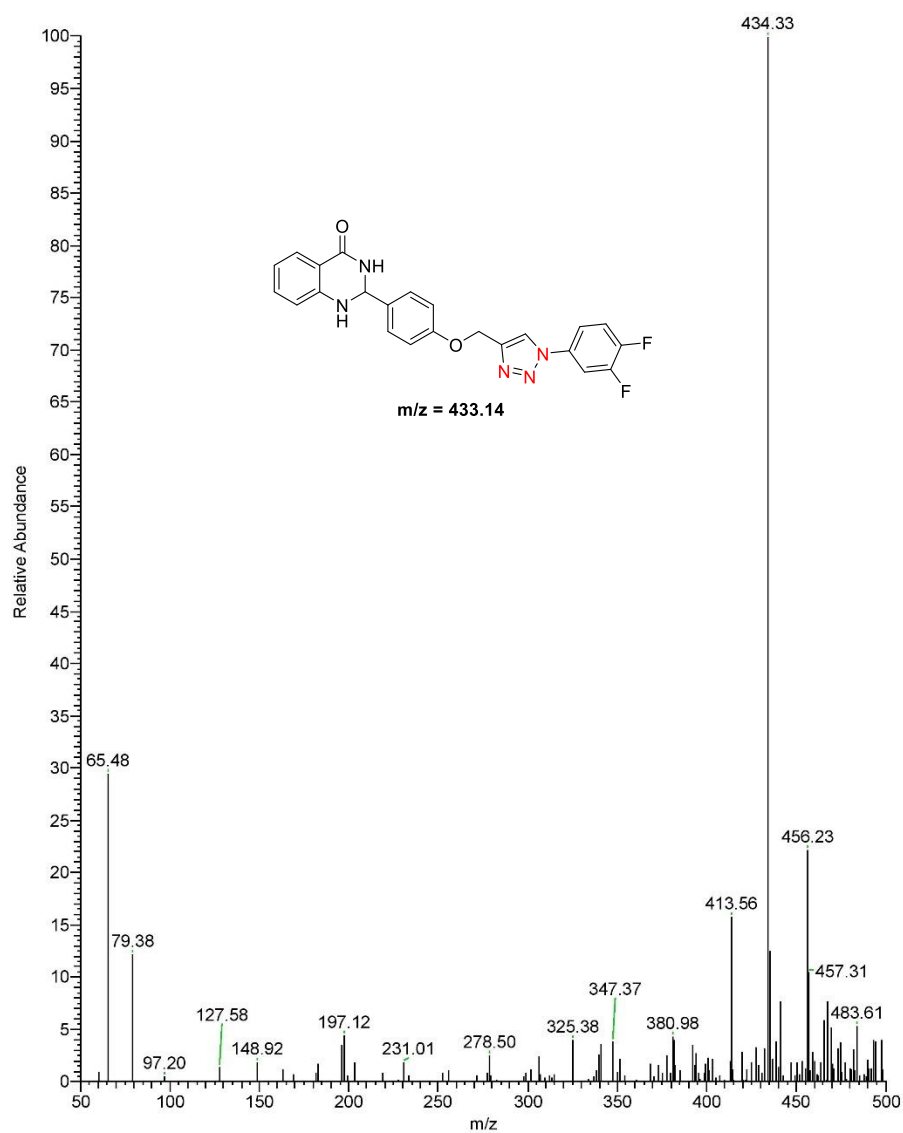

**Fig. S68:** LC-MS spectra of the compound **10b**.

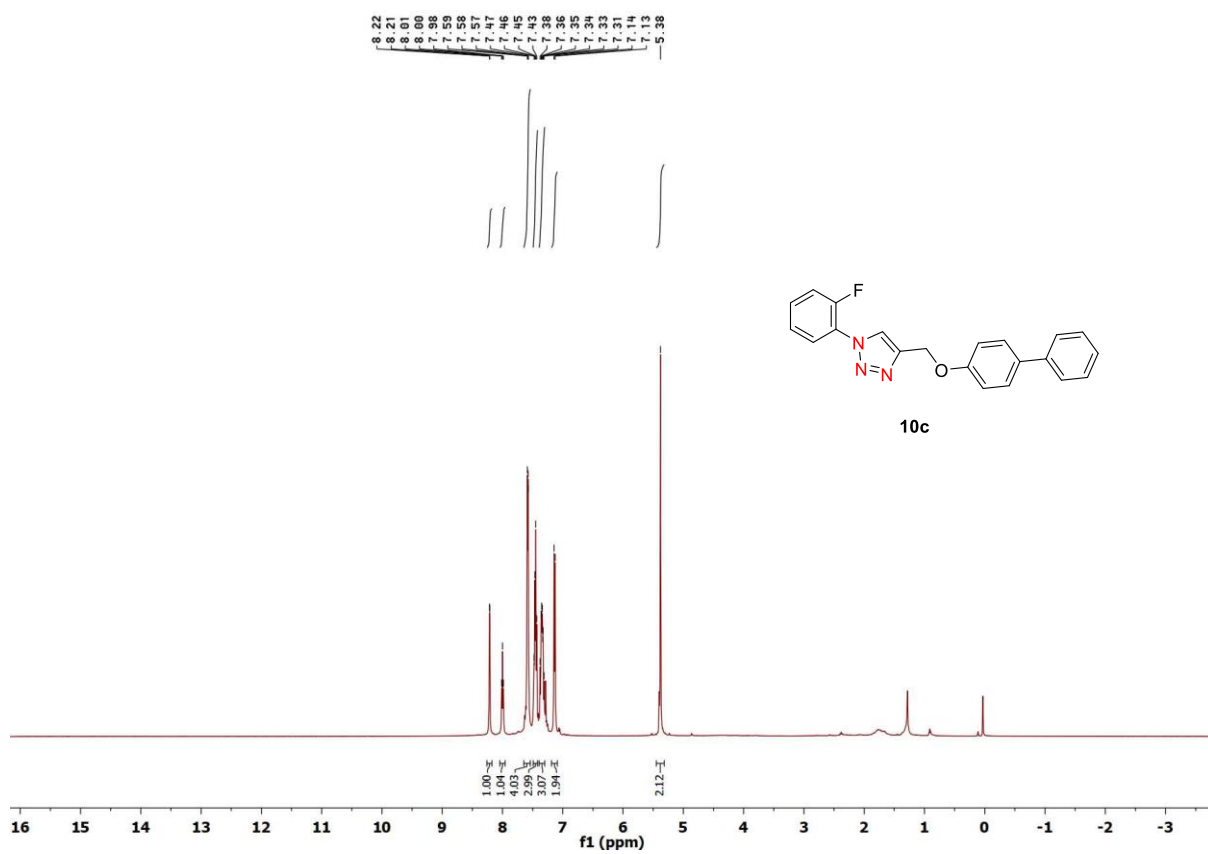

**Fig. S69:**  $^1\text{H NMR}$  (500 MHz,  $\text{CDCl}_3$ ) of the compound **10c**.

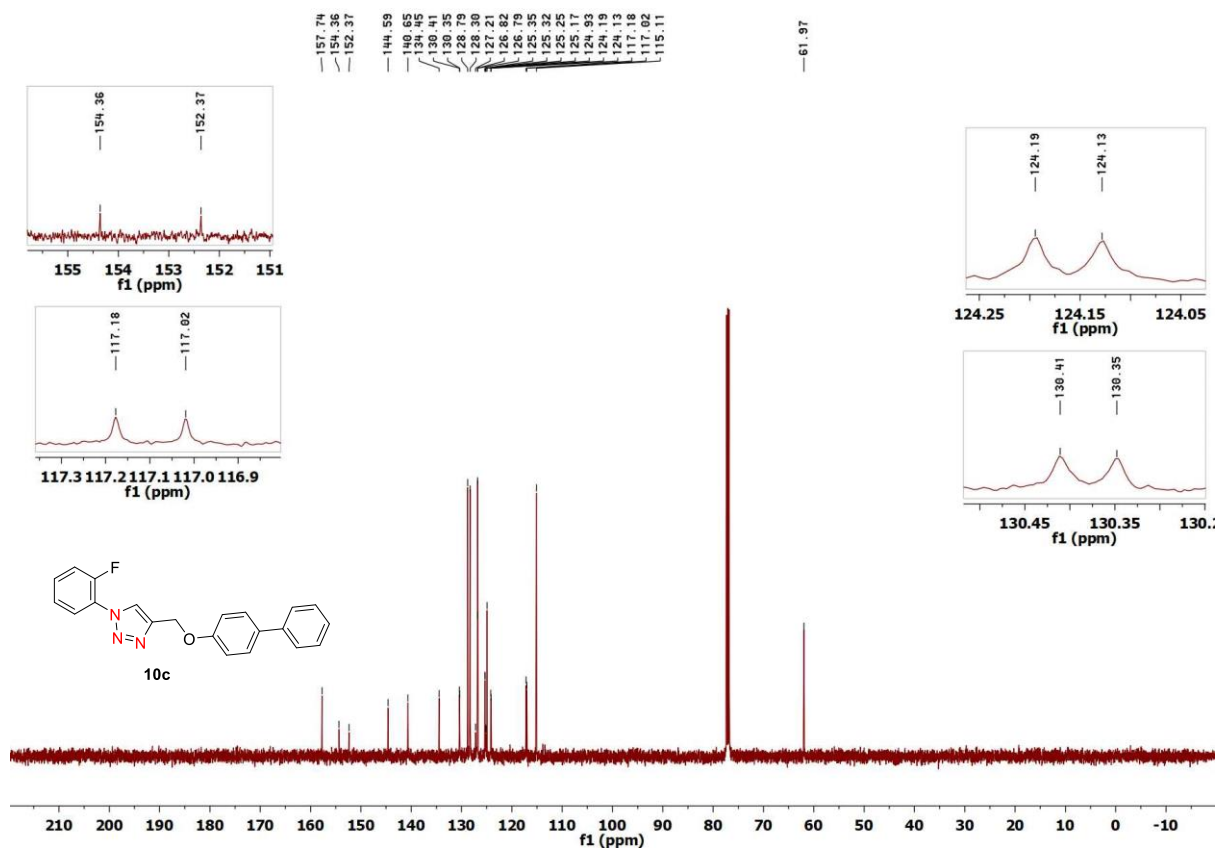

**Fig. S70:** <sup>13</sup>C NMR (125 MHz, CDCl<sub>3</sub>) of the compound **10c**.



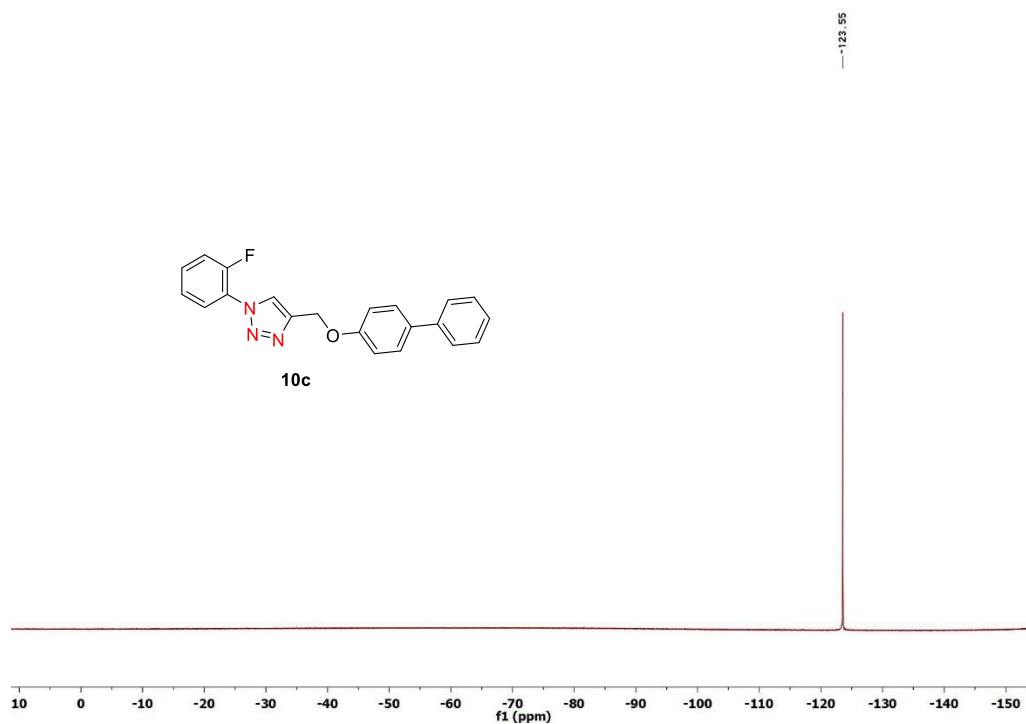

**Fig. S71:**  $^{19}\text{F}$  NMR (470 MHz,  $\text{CDCl}_3$ ) of the compound **10c**.

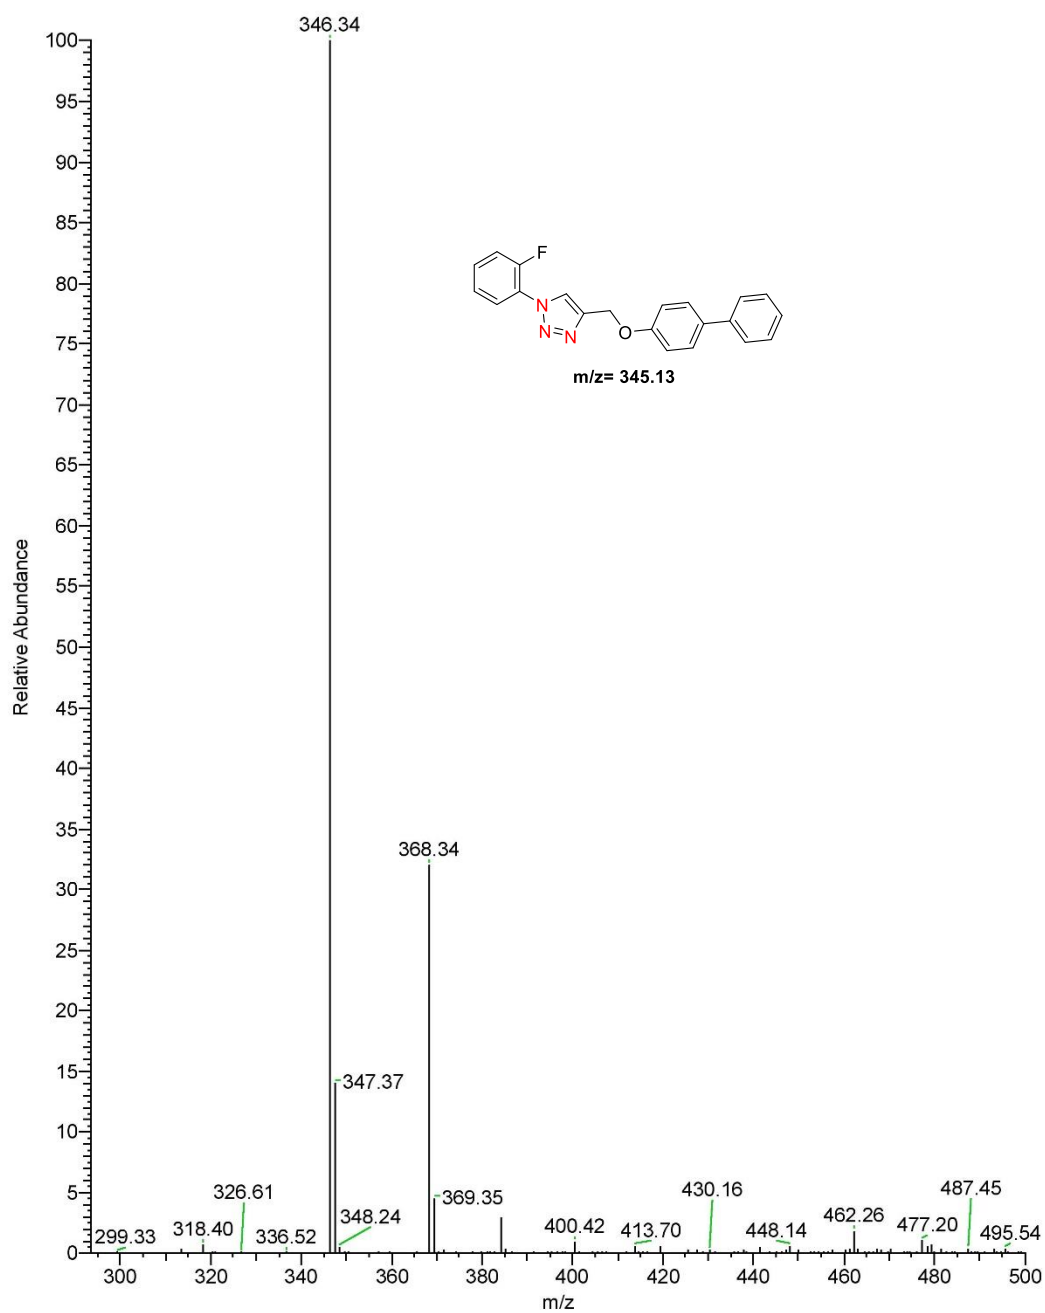

Fig. S72: LC-MS spectra of the compound 10c.

# Check CIF Report-Datablock: P-380

---

Bond precision: C-C = 0.0089 Å Wavelength=0.71073  
Cell: a=8.1513(8) b=5.6813(6) c=14.7970(15)  
alpha=90 beta=93.787(3) gamma=90  
Temperature: 298 K

|                        | Calculated   | Reported      |
|------------------------|--------------|---------------|
| Volume                 | 683.75(12)   | 683.75(12)    |
| Space group            | P 21         | P 21          |
| Hall group             | P 2yb        | P 2yb         |
| Moiety formula         | C16 H15 N3 O | ?             |
| Sum formula            | C16 H15 N3 O | C32 H30 N6 O2 |
| Mr                     | 265.31       | 530.62        |
| Dx, g cm <sup>-3</sup> | 1.289        | 1.289         |
| Z                      | 2            | 1             |
| Mu (mm <sup>-1</sup> ) | 0.083        | 0.083         |
| F000                   | 280.0        | 280.0         |
| F000'                  | 280.10       |               |
| h, k, lmax             | 8, 5, 15     | 8, 5, 15      |
| Nref                   | 1547 [ 873]  | 1539          |
| Tmin, Tmax             | 0.986, 0.993 |               |
| Tmin'                  | 0.980        |               |

Correction method= Not given  
Data completeness= 1.76/0.99 Theta(max)= 21.398  
R(reflections)= 0.0492( 1275) wR2(reflections)= 0.1202( 1539)  
S = 1.076 Npar= 182

---

The following ALERTS were generated. Each ALERT has the format

**test-name\_ALERT\_alert-type\_alert-level.**

Click on the hyperlinks for more details of the test.

---

## Alert level A

[THETM01\\_ALERT\\_3\\_A](#) The value of sine(theta\_max)/wavelength is less than 0.550  
Calculated sin(theta\_max)/wavelength = 0.5133

---

## Alert level B

[PLAT089\\_ALERT\\_3\\_B](#) Poor Data / Parameter Ratio (Zmax < 18) ..... 4.79 Note

---

## Alert level C

[STRVA01\\_ALERT\\_2\\_C](#) Chirality of atom sites is inverted?

From the CIF: `_refine_ls_abs_structure_Flack` 1.000

From the CIF: `_refine_ls_abs_structure_Flack_su` 1.000

[PLAT340\\_ALERT\\_3\\_C](#) Low Bond Precision on C-C Bonds ..... 0.00893 Ang.

[PLAT907\\_ALERT\\_2\\_C](#) Flack x > 0.5, Structure Needs to be Inverted? . 1.00 Check

[PLAT911\\_ALERT\\_3\\_C](#) Missing FCF Refl Between Thmin & STh/L= 0.513 2 Report  
7 1 7, -1 4 11,

---

## Alert level G

[PLAT032\\_ALERT\\_4\\_G](#) Std. Uncertainty on Flack Parameter Value High . 1.000 Report

[PLAT045\\_ALERT\\_1\\_G](#) Calculated and Reported Z Differ by a Factor ... 2 Check

---

PLAT720 ALERT 4 G Number of Unusual/Non-Standard Labels ..... 34 Note

N002 N003 N004 C005 C006 C007 C008 H008  
C009 H009 C00A H00A C00B C00C H00C C00D  
H00D C00E H00B H00E C00F H00F C00G H00G  
C00H H00H C00I H00I C00J H00J C00K H00K  
H00L H00M

PLAT883 ALERT 1 G No Info/Value for \_atom\_sites\_solution\_primary . Please Do !

PLAT899 ALERT 4 G SHELXL2018 is Deprecated and Succeeded by SHELXL 2019/3 Note

PLAT909 ALERT 3 G Percentage of I>2sig(I) Data at Theta(Max) Still 58% Note

PLAT916 ALERT 2 G Hooft y and Flack x Parameter Values Differ by . 0.60 Check

PLAT965 ALERT 2 G The SHELXL WEIGHT Optimisation has not Converged Please Check

PLAT967 ALERT 5 G Note: Two-Theta Cutoff Value in Embedded .res .. 50.0 Degree

PLAT969 ALERT 5 G The 'Henn et al.' R-Factor-gap value ..... 2.93 Note

Predicted wR2: Based on SigI\*\*2 4.10 or SHELX Weight 11.90

PLAT978 ALERT 2 G Number C-C Bonds with Positive Residual Density. 0 Info

- 1 **ALERT level A** = Most likely a serious problem - resolve or explain
- 1 **ALERT level B** = A potentially serious problem, consider carefully
- 4 **ALERT level C** = Check. Ensure it is not caused by an omission or oversight
- 11 **ALERT level G** = General information/check it is not something unexpected

PLATON version of 06/01/2024; check.def file version of 05/01/2024

## Datablock 4af - ellipsoid plot

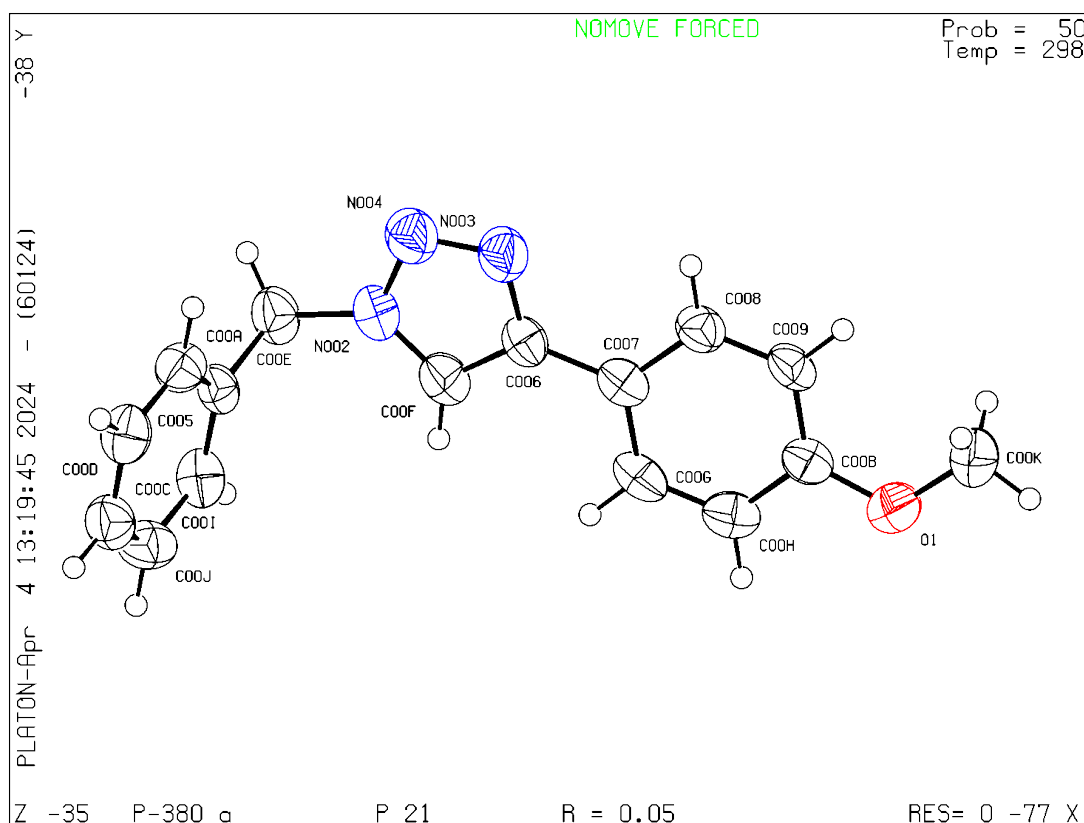

Supplement: d4nj03273j1.pdf [file d4nj03273j1.pdf]
